# Supplementary material for: EZH2 inhibition promotes tumor immunogenicity in lung squamous cell carcinomas
Source: PubMed Central journal article supplement — bioRxiv. 2023 Jun 8:2023.06.06.543919. Preprint. [Version 1] doi: 10.1101/2023.06.06.543919 (PMC10274685; doi:10.1101/2023.06.06.543919), 2023-06-08
Supplement: media-1.pdf [file media-1.pdf]

***EZH2 inhibition promotes tumor immunogenicity in lung squamous cell carcinomas*****Supplementary Tables 1-6****Supplementary Figures 1-6****Supplemental Table 1: GSEA on RNAseq of Tumoroids, related to Figure 3  
NES=Normalized Enrichment Score, FDR=False Discovery Rate**

| MSigDB Signature Name                    | Patient 1      |           | Patient 2      |           | Patient 1      |           | Patient 2      |           |
|------------------------------------------|----------------|-----------|----------------|-----------|----------------|-----------|----------------|-----------|
|                                          | GSK126 vs Veh  |           | GSK126 vs Veh  |           | EPZ6438 vs Veh |           | EPZ6438 vs Veh |           |
|                                          | NES            | FDR q-val | NES            | FDR q-val | NES            | FDR q-val | NES            | FDR q-val |
| HALLMARK_MYC_TARGETS_V1                  | -2.274         | 0.000     | -2.505         | 0.000     |                | 1.000     | -2.127         | 0.000     |
| HALLMARK_MYC_TARGETS_V2                  | -1.482         | 0.079     | -1.940         | 0.014     | -1.711         | 0.017     | -1.743         | 0.026     |
| HALLMARK_DNA_REPAIR                      | -1.356         | 0.085     | -1.413         | 0.097     | -0.833         | 0.644     | -1.207         | 0.217     |
| HALLMARK_UNFOLDED_PROTEIN_RESPONSE       | -1.360         | 0.096     | -1.273         | 0.160     | -1.542         | 0.039     | -1.142         | 0.268     |
| HALLMARK_E2F_TARGETS                     | -0.922         | 0.688     | -1.357         | 0.117     |                | 1.000     | -0.632         | 0.966     |
| HALLMARK_REACTIVE_OXYGEN_SPECIES_PATHWAY | -1.868         | 0.008     | -1.594         | 0.058     | -1.818         | 0.007     | -1.625         | 0.035     |
| HALLMARK_OXIDATIVE_PHOSPHORYLATION       | -2.657         | 0.000     | -2.152         | 0.000     | -2.161         | 0.004     | -2.125         | 0.000     |
| HALLMARK_INFLAMMATORY_RESPONSE           | 1.501          | 0.025     | 0.821          | 0.927     | 1.242          | 0.183     | -1.659         | 0.036     |
| HALLMARK_INTERFERON_GAMMA_RESPONSE       | 1.273          | 0.164     | 0.999          | 0.793     | 1.479          | 0.036     | 0.639          | 1.000     |
|                                          | GSK+IFN vs IFN |           | GSK+IFN vs IFN |           | EPZ+IFN vs IFN |           | EPZ+IFN vs IFN |           |
|                                          | NES            | FDR q-val | NES            | FDR q-val | NES            | FDR q-val | NES            | FDR q-val |
| HALLMARK_MYC_TARGETS_V1                  | -1.753         | 0.024     | -2.284         | 0.000     | -1.801         | 0.026     | -2.111         | 0.000     |
| HALLMARK_MYC_TARGETS_V2                  | -1.527         | 0.062     | -2.244         | 0.000     | -1.637         | 0.051     | -2.139         | 0.000     |
| HALLMARK_DNA_REPAIR                      | -1.064         | 0.420     | -1.540         | 0.069     | -1.121         | 0.361     | -1.419         | 0.117     |
| HALLMARK_UNFOLDED_PROTEIN_RESPONSE       | 0.892          | 0.977     | -0.829         | 0.814     | 0.716          | 1.000     | -0.648         | 0.965     |
| HALLMARK_E2F_TARGETS                     | -1.001         | 0.478     | -1.530         | 0.054     | -0.480         | 1.000     | -0.730         | 0.984     |
| HALLMARK_REACTIVE_OXYGEN_SPECIES_PATHWAY | -1.763         | 0.032     | -1.321         | 0.149     | -1.806         | 0.038     | -1.398         | 0.096     |
| HALLMARK_OXIDATIVE_PHOSPHORYLATION       | -2.091         | 0.002     | -1.393         | 0.107     | -2.064         | 0.000     | -1.557         | 0.067     |
| HALLMARK_INFLAMMATORY_RESPONSE           | 1.503          | 0.036     | 0.882          | 0.934     | 1.178          | 0.421     | -1.413         | 0.100     |
| HALLMARK_INTERFERON_GAMMA_RESPONSE       | 1.722          | 0.002     | 1.066          | 0.698     | 1.385          | 0.118     | 0.912          | 1.000     |
|                                          | Mouse 1        |           | Mouse 2        |           | Mouse 1        |           | Mouse 2        |           |
|                                          | GSK126 vs Veh  |           | GSK126 vs Veh  |           | EPZ6438 vs Veh |           | EPZ6438 vs Veh |           |
|                                          | NES            | FDR q-val | NES            | FDR q-val | NES            | FDR q-val | NES            | FDR q-val |
| HALLMARK_MYC_TARGETS_V1                  | -1.948         | 0.001     | -1.404         | 0.086     | -1.701         | 0.089     | -1.465         | 0.092     |
| HALLMARK_MYC_TARGETS_V2                  | -1.635         | 0.017     | -1.463         | 0.064     | -1.543         | 0.110     | -0.778         | 1.000     |
| HALLMARK_DNA_REPAIR                      | -1.572         | 0.025     | -0.815         | 0.981     | -1.542         | 0.073     | -1.315         | 0.167     |
| HALLMARK_UNFOLDED_PROTEIN_RESPONSE       | -1.348         | 0.112     | -1.000         | 0.690     | -1.313         | 0.178     | -0.693         | 0.931     |
| HALLMARK_E2F_TARGETS                     | -2.393         | 0.000     | -2.560         | 0.000     | -0.597         | 0.980     | -2.231         | 0.003     |
| HALLMARK_REACTIVE_OXYGEN_SPECIES_PATHWAY | -1.054         | 0.424     | 0.979          | 0.591     | -1.317         | 0.218     | 0.695          | 0.960     |
| HALLMARK_OXIDATIVE_PHOSPHORYLATION       | 0.534          | 0.998     | 0.499          | 0.999     | -1.198         | 0.258     | -0.728         | 1.000     |
| HALLMARK_INFLAMMATORY_RESPONSE           | 2.178          | 0.000     | 1.233          | 0.227     | 1.811          | 0.000     | 1.662          | 0.006     |
| HALLMARK_INTERFERON_GAMMA_RESPONSE       | 1.772          | 0.014     | 1.614          | 0.032     | 1.775          | 0.001     | 1.811          | 0.000     |
|                                          | GSK+IFN vs IFN |           | GSK+IFN vs IFN |           | EPZ+IFN vs IFN |           | EPZ+IFN vs IFN |           |
|                                          | NES            | FDR q-val | NES            | FDR q-val | NES            | FDR q-val | NES            | FDR q-val |
| HALLMARK_MYC_TARGETS_V1                  | -1.618         | 0.050     | -2.248         | 0.000     | -2.003         | 0.008     | -2.443         | 0.000     |
| HALLMARK_MYC_TARGETS_V2                  | -2.020         | 0.007     | -2.006         | 0.000     | -1.930         | 0.007     | -1.969         | 0.005     |
| HALLMARK_DNA_REPAIR                      | -0.938         | 0.889     | -1.046         | 0.469     | -1.350         | 0.144     | -1.591         | 0.030     |
| HALLMARK_UNFOLDED_PROTEIN_RESPONSE       | -1.559         | 0.044     | -1.936         | 0.001     | -1.732         | 0.017     | -1.955         | 0.004     |
| HALLMARK_E2F_TARGETS                     | -1.185         | 0.458     | -2.775         | 0.000     | -1.024         | 0.392     | -2.832         | 0.000     |
| HALLMARK_REACTIVE_OXYGEN_SPECIES_PATHWAY | -0.911         | 0.884     | 0.768          | 0.945     | -1.309         | 0.143     | -0.828         | 0.799     |
| HALLMARK_OXIDATIVE_PHOSPHORYLATION       | 0.510          | 0.998     | -0.779         | 1.000     | -1.114         | 0.294     | -1.681         | 0.023     |
| HALLMARK_INFLAMMATORY_RESPONSE           | 2.196          | 0.000     | 1.512          | 0.108     | 1.894          | 0.000     | 1.895          | 0.000     |
| HALLMARK_INTERFERON_GAMMA_RESPONSE       | 1.888          | 0.001     | 1.426          | 0.121     | 1.663          | 0.007     | 1.937          | 0.000     |

**Supplemental Table 2: GSEA on Genes That were Up-regulated and Lost H3K27me3 Peaks in Combination Treatment vs IFN $\gamma$  alone, related to Figure 4**

| Group                       | MSigDB Signature Name                                       | GeneRatio | BgRatio    | P Value  | Adj. P value | FDR q value |
|-----------------------------|-------------------------------------------------------------|-----------|------------|----------|--------------|-------------|
| Inflammatory Responses      | MANNE_COVID19_COMBINED_COHORT_VS_HEALTHY_DONOR_PLATELETS_DN | 16/272    | 228/21697  | 3.32E-08 | 4.54878E-06  | 3.8288E-06  |
|                             | MANNE_COVID19_ICU_VS_HEALTHY_DONOR_PLATELETS_DN             | 13/272    | 162/21697  | 1.4E-07  | 1.74026E-05  | 1.46481E-05 |
|                             | REACTOME_INTERFERON_GAMMA_SIGNALING                         | 8/272     | 93/21697   | 2.23E-05 | 0.001175233  | 0.000989219 |
|                             | REACTOME_PD_1_SIGNALING                                     | 5/272     | 28/21697   | 2.32E-05 | 0.001175233  | 0.000989219 |
|                             | REACTOME_MHC_CLASS_II_ANTIGEN_PRESENTATION                  | 9/272     | 126/21697  | 3.07E-05 | 0.00150398   | 0.001265932 |
|                             | KEGG_ASTHMA                                                 | 5/272     | 30/21697   | 3.29E-05 | 0.001564249  | 0.001316661 |
|                             | KEGG_ALLOGRAFT_REJECTION                                    | 5/272     | 37/21697   | 9.37E-05 | 0.003565296  | 0.003000985 |
|                             | KEGG_GRAFT_VERSUS_HOST_DISEASE                              | 5/272     | 41/21697   | 0.000155 | 0.005362662  | 0.004513866 |
| Cell Adhesion and Signaling | KEGG_CELL_ADHESION_MOLECULES_CAMS                           | 12/272    | 133/21697  | 1.18E-07 | 1.54175E-05  | 1.29773E-05 |
|                             | ZWANG_TRANSIENTLY_UP_BY_2ND_EGF_PULSE_ONLY                  | 50/272    | 1941/21697 | 7.24E-07 | 6.61582E-05  | 5.56867E-05 |
|                             | ONDER_CDH1_TARGETS_2_UP                                     | 12/272    | 257/21697  | 0.000104 | 0.003918949  | 0.003298662 |
|                             | KEGG_FOCAL_ADHESION                                         | 11/272    | 199/21697  | 4.51E-05 | 0.001992359  | 0.001677011 |
| TP53 and Apoptosis          | PEREZ_TP53_TARGETS                                          | 40/272    | 1198/21697 | 1.49E-08 | 2.39558E-06  | 2.01641E-06 |
|                             | BRUINS_UVC_RESPONSE_VIA_TP53_GROUP_A                        | 30/272    | 884/21697  | 7.99E-07 | 6.84384E-05  | 5.7606E-05  |
|                             | PEREZ_TP53_AND_TP63_TARGETS                                 | 11/272    | 208/21697  | 6.73E-05 | 0.002792285  | 0.002350325 |
|                             | HANN_RESISTANCE_TO_BCL2_INHIBITOR_UP                        | 5/272     | 36/21697   | 8.19E-05 | 0.003298434  | 0.002776362 |
| Nervous System              | REACTOME_NEURONAL_SYSTEM                                    | 27/272    | 410/21697  | 2.36E-12 | 6.46166E-10  | 5.43892E-10 |
|                             | REACTOME_TRANSMISSION_ACROSS_CHEMICAL_SYNAPSES              | 16/272    | 269/21697  | 3.22E-07 | 3.39241E-05  | 2.85546E-05 |
|                             | REACTOME_NERVOUS_SYSTEM_DEVELOPMENT                         | 23/272    | 580/21697  | 1.28E-06 | 0.000103351  | 8.69924E-05 |
|                             | REACTOME_NEUROTRANSMITTER_RECEPTORS_AND_POSTSYNAPTIC_SIGNAL | 10/272    | 205/21697  | 0.000276 | 0.008316188  | 0.006999911 |
| Polycomb Targets            | BENPORATH_ES_WITH_H3K27ME3                                  | 76/272    | 1114/21697 | 3.02E-35 | 8.26451E-32  | 6.95641E-32 |
|                             | BENPORATH_SUZ12_TARGETS                                     | 70/272    | 1033/21697 | 4.01E-32 | 5.49216E-29  | 4.62287E-29 |
|                             | MIKKELSEN_MEF_HCP_WITH_H3K27ME3                             | 51/272    | 590/21697  | 4.28E-28 | 3.9059E-25   | 3.28768E-25 |
|                             | BENPORATH_EED_TARGETS                                       | 64/272    | 1058/21697 | 1.75E-26 | 1.19586E-23  | 1.00658E-23 |
|                             | MEISSNER_BRAIN_HCP_WITH_H3K4ME3_AND_H3K27ME3                | 64/272    | 1073/21697 | 3.81E-26 | 2.08627E-23  | 1.75606E-23 |
|                             | MIKKELSEN_MCV6_HCP_WITH_H3K27ME3                            | 43/272    | 437/21697  | 5.7E-26  | 2.60336E-23  | 2.1913E-23  |
|                             | BENPORATH_PRC2_TARGETS                                      | 49/272    | 649/21697  | 2.32E-24 | 9.07209E-22  | 7.63617E-22 |
|                             | MIKKELSEN_NPC_HCP_WITH_H3K27ME3                             | 26/272    | 345/21697  | 2.83E-13 | 9.6866E-11   | 8.15342E-11 |
|                             | MEISSNER_NPC_HCP_WITH_H3K4ME2_AND_H3K27ME3                  | 26/272    | 350/21697  | 3.95E-13 | 1.20105E-10  | 1.01095E-10 |
|                             | MEISSNER_BRAIN_HCP_WITH_H3K27ME3                            | 20/272    | 271/21697  | 2.52E-10 | 6.27713E-08  | 5.28359E-08 |
|                             | MIKKELSEN_NPC_HCP_WITH_H3K4ME3_AND_H3K27ME3                 | 17/272    | 210/21697  | 1.42E-09 | 3.23121E-07  | 2.71978E-07 |
|                             | MEISSNER_NPC_HCP_WITH_H3K4ME3_AND_H3K27ME3                  | 13/272    | 143/21697  | 3.19E-08 | 4.54878E-06  | 3.8288E-06  |

**Supplemental Table 3: Genes Highly Expressed in All 16 Clusters, Related to Figure 6**  
**Log2FC=Log2-fold change between cluster and all others, pct=percentage of cells expressing**

| Cluster | Gene Symbol   | Log2FC | pct.1 | pct.2   | P value | Adj P value | Cluster   | Gene Symbol | Log2FC | pct.1    | pct.2    | P value  | Adj P value |
|---------|---------------|--------|-------|---------|---------|-------------|-----------|-------------|--------|----------|----------|----------|-------------|
| Tumor   | Krt19         | 4.685  | 0.977 | 0.814   | 0.0E+00 | 0.0E+00     | Dendritic | Cd74        | 4.390  | 0.964    | 0.555    | 0.0E+00  | 0.0E+00     |
|         | Ppbp          | 4.050  | 0.781 | 0.673   | 0.0E+00 | 0.0E+00     |           | H2-Ab1      | 4.061  | 0.934    | 0.629    | 0.0E+00  | 0.0E+00     |
|         | S100a7a       | 3.910  | 0.908 | 0.872   | 0.0E+00 | 0.0E+00     |           | C1qa        | 3.857  | 0.988    | 0.581    | 0.0E+00  | 0.0E+00     |
|         | S100a10       | 3.589  | 0.968 | 0.700   | 0.0E+00 | 0.0E+00     |           | H2-Aa       | 3.618  | 0.918    | 0.556    | 0.0E+00  | 0.0E+00     |
|         | Ly6d          | 3.380  | 0.853 | 0.767   | 0.0E+00 | 0.0E+00     |           | C1qb        | 3.455  | 0.982    | 0.503    | 0.0E+00  | 0.0E+00     |
|         | Prss27        | 3.341  | 0.899 | 0.825   | 0.0E+00 | 0.0E+00     |           | Apoe        | 3.074  | 0.985    | 0.781    | 0.0E+00  | 0.0E+00     |
|         | Krt18         | 3.333  | 0.824 | 0.698   | 0.0E+00 | 0.0E+00     |           | C1qc        | 2.985  | 0.988    | 0.640    | 0.0E+00  | 0.0E+00     |
|         | Plet1         | 3.301  | 0.954 | 0.684   | 0.0E+00 | 0.0E+00     |           | Ms4a6c      | 2.243  | 0.930    | 0.407    | 0.0E+00  | 0.0E+00     |
|         | Nupr1         | 3.285  | 0.892 | 0.671   | 0.0E+00 | 0.0E+00     |           | Ms4a7       | 2.238  | 0.969    | 0.433    | 0.0E+00  | 0.0E+00     |
|         | S100a16       | 3.221  | 0.951 | 0.730   | 0.0E+00 | 0.0E+00     |           | Cts5        | 1.932  | 0.990    | 0.654    | 0.0E+00  | 0.0E+00     |
|         | Krt23         | 3.208  | 0.894 | 0.638   | 0.0E+00 | 0.0E+00     |           | Cst3        | 1.844  | 0.987    | 0.817    | 0.0E+00  | 0.0E+00     |
|         | Ly6c1         | 2.943  | 0.832 | 0.652   | 0.0E+00 | 0.0E+00     |           | Gatm        | 1.752  | 0.937    | 0.517    | 0.0E+00  | 0.0E+00     |
|         | Atp1b1        | 2.870  | 0.888 | 0.682   | 0.0E+00 | 0.0E+00     |           | Lair1       | 1.530  | 0.895    | 0.546    | 0.0E+00  | 0.0E+00     |
|         | Irf7          | 2.800  | 0.937 | 0.588   | 0.0E+00 | 0.0E+00     |           | Pld4        | 1.525  | 0.899    | 0.187    | 0.0E+00  | 0.0E+00     |
|         | Isg15         | 2.772  | 0.869 | 0.644   | 0.0E+00 | 0.0E+00     |           | Tmem119     | 0.828  | 0.959    | 0.256    | 0.0E+00  | 0.0E+00     |
|         | Tspan1        | 2.562  | 0.857 | 0.516   | 0.0E+00 | 0.0E+00     |           | Cxcl9       | 0.789  | 0.946    | 0.644    | 0.0E+00  | 0.0E+00     |
|         | Hspa5         | 2.539  | 0.951 | 0.818   | 0.0E+00 | 0.0E+00     |           | Ccl8        | 0.651  | 0.962    | 0.382    | 0.0E+00  | 0.0E+00     |
|         | Glrx          | 2.448  | 0.869 | 0.594   | 0.0E+00 | 0.0E+00     |           | Retnla      | 0.821  | 0.957    | 0.743    | 2.9E-289 | 4.4E-286    |
|         | Emp1          | 2.302  | 0.920 | 0.778   | 0.0E+00 | 0.0E+00     |           | Cybb        | 1.677  | 0.924    | 0.514    | 1.9E-288 | 2.9E-285    |
|         | Hopx          | 2.294  | 0.766 | 0.477   | 0.0E+00 | 0.0E+00     |           | Gngt2       | 1.535  | 0.964    | 0.637    | 4.8E-284 | 7.2E-281    |
|         | Cd81          | 2.276  | 0.909 | 0.547   | 0.0E+00 | 0.0E+00     |           | Cxcl16      | 1.511  | 0.983    | 0.701    | 5.4E-279 | 8.1E-276    |
|         | Arg1          | 2.255  | 0.872 | 0.739   | 0.0E+00 | 0.0E+00     |           | Fyb         | 1.709  | 0.949    | 0.688    | 1.7E-277 | 2.5E-274    |
|         | Scgb1a1       | 2.246  | 0.831 | 0.809   | 0.0E+00 | 0.0E+00     |           | Pou2f2      | 1.956  | 0.849    | 0.421    | 1.4E-270 | 2.1E-267    |
|         | Lmo7          | 2.226  | 0.849 | 0.750   | 0.0E+00 | 0.0E+00     |           | Acp5        | 1.404  | 0.968    | 0.607    | 4.2E-268 | 6.3E-265    |
|         | Ceacam1       | 2.214  | 0.888 | 0.649   | 0.0E+00 | 0.0E+00     |           | Lgmn        | 1.372  | 0.964    | 0.624    | 2.1E-257 | 3.2E-254    |
|         | Dusp14        | 2.072  | 0.836 | 0.675   | 0.0E+00 | 0.0E+00     |           | Air1        | 2.087  | 0.853    | 0.573    | 2.8E-255 | 4.3E-252    |
|         | Wnt4          | 2.037  | 0.882 | 0.722   | 0.0E+00 | 0.0E+00     |           | Atp1a1      | 1.325  | 0.957    | 0.700    | 3.7E-254 | 5.6E-251    |
|         | Clu           | 2.031  | 0.918 | 0.761   | 0.0E+00 | 0.0E+00     |           | Lyz2        | 0.748  | 0.994    | 0.755    | 9.3E-252 | 1.4E-248    |
|         | Epcam         | 2.006  | 0.848 | 0.601   | 0.0E+00 | 0.0E+00     |           | Trf         | 1.377  | 0.891    | 0.499    | 4.4E-247 | 6.7E-244    |
|         | Anxa1         | 2.002  | 0.919 | 0.772   | 0.0E+00 | 0.0E+00     |           | Ms4a6d      | 1.230  | 0.895    | 0.733    | 2.9E-240 | 4.4E-237    |
|         | Cldn3         | 1.963  | 0.803 | 0.773   | 0.0E+00 | 0.0E+00     |           | Csf1r       | 1.731  | 0.824    | 0.437    | 2.0E-233 | 3.1E-230    |
|         | 2310007B03Ril | 1.887  | 0.861 | 0.663   | 0.0E+00 | 0.0E+00     |           | Bcl2a1d     | 1.057  | 0.884    | 0.505    | 3.6E-223 | 5.4E-220    |
|         | Pdzk1ip1      | 1.882  | 0.850 | 0.786   | 0.0E+00 | 0.0E+00     |           | Fcgr1       | 0.866  | 0.839    | 0.480    | 3.3E-217 | 5.0E-214    |
|         | Prss22        | 1.850  | 0.702 | 0.557   | 0.0E+00 | 0.0E+00     |           | Napsa       | 1.159  | 0.904    | 0.579    | 1.7E-213 | 2.5E-210    |
|         | Aqp5          | 1.785  | 0.676 | 0.741   | 0.0E+00 | 0.0E+00     |           | Ly86        | 1.085  | 0.807    | 0.287    | 7.3E-213 | 1.1E-209    |
|         | Cldn7         | 1.777  | 0.732 | 0.679   | 0.0E+00 | 0.0E+00     |           | Ctsc        | 1.394  | 0.881    | 0.644    | 2.9E-207 | 4.4E-204    |
|         | Jdp2          | 1.736  | 0.810 | 0.711   | 0.0E+00 | 0.0E+00     |           | Gm2a        | 1.234  | 0.909    | 0.624    | 5.8E-207 | 8.7E-204    |
|         | Plpp1         | 1.699  | 0.783 | 0.653   | 0.0E+00 | 0.0E+00     |           | Malb        | 1.508  | 0.853    | 0.588    | 4.2E-199 | 6.3E-196    |
|         | Avp1          | 1.689  | 0.843 | 0.712   | 0.0E+00 | 0.0E+00     |           | Ccr2        | 0.905  | 0.788    | 0.255    | 3.8E-195 | 5.7E-192    |
|         | Nccrp1        | 1.658  | 0.754 | 0.730   | 0.0E+00 | 0.0E+00     |           | Ifitm3      | 1.495  | 0.943    | 0.695    | 1.8E-194 | 2.6E-191    |
|         | Errfi1        | 1.618  | 0.894 | 0.564   | 0.0E+00 | 0.0E+00     |           | Pgls        | 0.758  | 0.921    | 0.629    | 5.1E-182 | 7.6E-179    |
|         | Plat          | 1.601  | 0.627 | 0.504   | 0.0E+00 | 0.0E+00     |           | Itgb5       | 0.923  | 0.849    | 0.676    | 1.1E-177 | 1.6E-174    |
|         | Gsta4         | 1.599  | 0.796 | 0.689   | 0.0E+00 | 0.0E+00     |           | Rpl3        | 1.055  | 0.970    | 0.708    | 1.1E-177 | 1.7E-174    |
|         | Tacstd2       | 1.567  | 0.736 | 0.538   | 0.0E+00 | 0.0E+00     |           | Gpx1        | 0.883  | 0.965    | 0.833    | 4.2E-173 | 6.3E-170    |
|         | Calr          | 1.558  | 0.945 | 0.734   | 0.0E+00 | 0.0E+00     |           | Clec4a3     | 1.528  | 0.770    | 0.440    | 5.1E-172 | 7.6E-169    |
|         | Tubb4b        | 1.556  | 0.918 | 0.674   | 0.0E+00 | 0.0E+00     |           | Cd72        | 1.163  | 0.717    | 0.163    | 1.4E-171 | 2.1E-168    |
|         | Wwtr1         | 1.537  | 0.890 | 0.574   | 0.0E+00 | 0.0E+00     |           | Cx3cr1      | 1.589  | 0.759    | 0.360    | 7.3E-171 | 1.1E-167    |
|         | Fxyd3         | 1.529  | 0.782 | 0.582   | 0.0E+00 | 0.0E+00     |           | Tgfb1       | 0.964  | 0.915    | 0.601    | 2.9E-170 | 4.4E-167    |
|         | Csrp1         | 1.520  | 0.819 | 0.671   | 0.0E+00 | 0.0E+00     |           | Asah1       | 0.779  | 0.879    | 0.564    | 1.0E-169 | 1.5E-166    |
|         | Spns3         | 1.512  | 0.823 | 0.552   | 0.0E+00 | 0.0E+00     |           | Ptma        | 0.975  | 0.965    | 0.726    | 1.6E-165 | 2.4E-162    |
|         | Mall          | 1.506  | 0.859 | 0.721   | 0.0E+00 | 0.0E+00     |           | Smpd3a      | 1.034  | 0.904    | 0.622    | 3.0E-163 | 4.5E-160    |
|         | Gprc5a        | 1.498  | 0.799 | 0.586   | 0.0E+00 | 0.0E+00     |           | Ucp2        | 0.852  | 0.973    | 0.726    | 5.8E-162 | 8.7E-159    |
|         | Herpud1       | 1.429  | 0.790 | 0.560   | 0.0E+00 | 0.0E+00     |           | Bcl2a1a     | 0.700  | 0.859    | 0.545    | 1.3E-159 | 1.9E-156    |
|         | Ddit3         | 1.405  | 0.820 | 0.723   | 0.0E+00 | 0.0E+00     |           | Cd300e      | 1.156  | 0.727    | 0.244    | 4.8E-158 | 7.1E-155    |
|         | Clec2g        | 1.386  | 0.818 | 0.436   | 0.0E+00 | 0.0E+00     |           | Ctsz        | 0.849  | 0.994    | 0.790    | 2.0E-152 | 3.1E-149    |
|         | Dnajb1        | 1.374  | 0.893 | 0.567   | 0.0E+00 | 0.0E+00     |           | Laptm5      | 0.768  | 0.989    | 0.732    | 2.3E-151 | 3.5E-148    |
|         | Cidea         | 1.304  | 0.610 | 0.536   | 0.0E+00 | 0.0E+00     |           | Rassf4      | 0.995  | 0.789    | 0.576    | 1.5E-149 | 2.3E-146    |
| Lrrc26  | 1.302         | 0.812  | 0.724 | 0.0E+00 | 0.0E+00 | Emp3        | 1.135     | 0.840       | 0.456  | 8.3E-148 | 1.2E-144 |          |             |
| Cldn23  | 1.294         | 0.734  | 0.615 | 0.0E+00 | 0.0E+00 | Erp29       | 1.067     | 0.922       | 0.709  | 9.2E-146 | 1.4E-142 |          |             |
| Chac1   | 1.291         | 0.750  | 0.706 | 0.0E+00 | 0.0E+00 | Sdf2l1      | 0.667     | 0.902       | 0.718  | 1.0E-143 | 1.5E-140 |          |             |
| Rdh10   | 1.290         | 0.787  | 0.518 | 0.0E+00 | 0.0E+00 | Cd300c2     | 0.691     | 0.932       | 0.651  | 5.4E-142 | 8.1E-139 |          |             |
| Fam57a  | 1.279         | 0.733  | 0.754 | 0.0E+00 | 0.0E+00 | Clec4a1     | 1.686     | 0.720       | 0.281  | 1.3E-141 | 1.9E-138 |          |             |
| Gadd45b | 1.263         | 0.948  | 0.711 | 0.0E+00 | 0.0E+00 | Ms4a6b      | 1.104     | 0.755       | 0.271  | 1.1E-138 | 1.6E-135 |          |             |
| Cops6   | 1.253         | 0.833  | 0.647 | 0.0E+00 | 0.0E+00 | Tmem160     | 0.781     | 0.834       | 0.577  | 2.9E-137 | 4.4E-134 |          |             |
| Krt8    | 1.231         | 0.690  | 0.700 | 0.0E+00 | 0.0E+00 | H2-DMa      | 1.252     | 0.756       | 0.394  | 3.1E-136 | 4.7E-133 |          |             |
| Gadd45g | 1.225         | 0.659  | 0.573 | 0.0E+00 | 0.0E+00 | Abhd12      | 0.845     | 0.790       | 0.432  | 6.7E-135 | 1.0E-131 |          |             |
| Fam110a | 1.163         | 0.787  | 0.499 | 0.0E+00 | 0.0E+00 | Hexb        | 1.403     | 0.863       | 0.751  | 6.5E-132 | 9.7E-129 |          |             |
| Pls3    | 1.149         | 0.784  | 0.594 | 0.0E+00 | 0.0E+00 | S100a4      | 1.042     | 0.790       | 0.500  | 1.6E-130 | 2.3E-127 |          |             |
| Hbegf   | 1.114         | 0.731  | 0.762 | 0.0E+00 | 0.0E+00 | Flna        | 0.830     | 0.835       | 0.487  | 2.2E-128 | 3.3E-125 |          |             |

|               |       |       |       |          |          |                |       |       |       |          |          |
|---------------|-------|-------|-------|----------|----------|----------------|-------|-------|-------|----------|----------|
| Phlda1        | 1.100 | 0.759 | 0.510 | 0.0E+00  | 0.0E+00  | Unc93b1        | 0.755 | 0.848 | 0.511 | 1.4E-127 | 2.0E-124 |
| Krt80         | 1.097 | 0.845 | 0.529 | 0.0E+00  | 0.0E+00  | Pid1           | 0.802 | 0.765 | 0.585 | 1.5E-127 | 2.2E-124 |
| Manf          | 1.096 | 0.869 | 0.829 | 0.0E+00  | 0.0E+00  | Rras           | 0.921 | 0.760 | 0.544 | 7.2E-126 | 1.1E-122 |
| Pamr1         | 1.078 | 0.778 | 0.721 | 0.0E+00  | 0.0E+00  | Itgb2          | 0.950 | 0.910 | 0.585 | 2.3E-124 | 3.5E-121 |
| Hsd17b2       | 1.076 | 0.686 | 0.537 | 0.0E+00  | 0.0E+00  | Lilra5         | 1.100 | 0.724 | 0.321 | 2.1E-120 | 3.2E-117 |
| Slco2a1       | 1.075 | 0.676 | 0.528 | 0.0E+00  | 0.0E+00  | Mgst1          | 0.710 | 0.874 | 0.601 | 1.1E-119 | 1.6E-116 |
| 2610528A11Ril | 1.070 | 0.701 | 0.641 | 0.0E+00  | 0.0E+00  | Selenop        | 0.924 | 0.776 | 0.519 | 2.1E-115 | 3.2E-112 |
| Apol7a        | 1.050 | 0.698 | 0.453 | 0.0E+00  | 0.0E+00  | mt-Nd1         | 0.722 | 0.963 | 0.666 | 1.7E-114 | 2.6E-111 |
| Mlph          | 1.045 | 0.754 | 0.665 | 0.0E+00  | 0.0E+00  | Fcgrt          | 0.886 | 0.735 | 0.282 | 7.0E-114 | 1.0E-110 |
| Sqstm1        | 1.023 | 0.873 | 0.581 | 0.0E+00  | 0.0E+00  | Plekho1        | 0.926 | 0.756 | 0.553 | 7.7E-112 | 1.2E-108 |
| Pmaip1        | 0.991 | 0.742 | 0.669 | 0.0E+00  | 0.0E+00  | Ndufa4         | 0.708 | 0.879 | 0.666 | 2.0E-111 | 3.0E-108 |
| Oasl1         | 0.984 | 0.620 | 0.575 | 0.0E+00  | 0.0E+00  | Mef2c          | 1.025 | 0.724 | 0.384 | 3.3E-106 | 5.0E-103 |
| Plac8         | 0.977 | 0.735 | 0.523 | 0.0E+00  | 0.0E+00  | Irf8           | 1.231 | 0.760 | 0.635 | 2.2E-105 | 3.3E-102 |
| Ifi202b       | 0.963 | 0.703 | 0.648 | 0.0E+00  | 0.0E+00  | Npc2           | 0.824 | 0.958 | 0.889 | 2.4E-101 | 3.7E-98  |
| Rbp1          | 0.960 | 0.608 | 0.545 | 0.0E+00  | 0.0E+00  | Plac8          | 1.352 | 0.759 | 0.557 | 6.2E-100 | 9.3E-97  |
| 2010109I03Rik | 0.930 | 0.607 | 0.662 | 0.0E+00  | 0.0E+00  | H2-DMb1        | 1.111 | 0.707 | 0.428 | 3.2E-94  | 4.9E-91  |
| Tspan8        | 0.903 | 0.766 | 0.646 | 0.0E+00  | 0.0E+00  | Tifab          | 0.751 | 0.686 | 0.354 | 2.7E-81  | 4.1E-78  |
| Yod1          | 0.898 | 0.649 | 0.569 | 0.0E+00  | 0.0E+00  | Pltp           | 0.669 | 0.703 | 0.365 | 9.6E-81  | 1.4E-77  |
| Cald1         | 0.888 | 0.677 | 0.690 | 0.0E+00  | 0.0E+00  | Ccdc88a        | 1.007 | 0.688 | 0.547 | 2.3E-70  | 3.5E-67  |
| Plk2          | 0.881 | 0.723 | 0.493 | 0.0E+00  | 0.0E+00  | Ear2           | 1.003 | 0.647 | 0.320 | 8.7E-66  | 1.3E-62  |
| Ephb3         | 0.877 | 0.717 | 0.631 | 0.0E+00  | 0.0E+00  | Ms4a4c         | 0.756 | 0.630 | 0.135 | 1.7E-64  | 2.5E-61  |
| Oit1          | 0.851 | 0.751 | 0.566 | 0.0E+00  | 0.0E+00  | Ace            | 1.683 | 0.644 | 0.536 | 6.6E-64  | 9.9E-61  |
| Hsp90aa1      | 0.846 | 0.911 | 0.832 | 0.0E+00  | 0.0E+00  | Evl            | 0.693 | 0.688 | 0.340 | 1.6E-61  | 2.4E-58  |
| Klk8          | 0.932 | 0.547 | 0.488 | 6.8E-289 | 1.0E-285 | Ifi2712a       | 0.784 | 0.697 | 0.528 | 8.9E-55  | 1.3E-51  |
| Hsp90b1       | 1.266 | 0.827 | 0.781 | 2.1E-272 | 3.1E-269 | Gm15987        | 0.810 | 0.635 | 0.261 | 1.1E-54  | 1.6E-51  |
| Tsc22d1       | 0.850 | 0.640 | 0.773 | 8.6E-178 | 1.3E-174 | Klf4           | 0.724 | 0.648 | 0.422 | 4.9E-44  | 7.3E-41  |
| Clic5         | 1.114 | 0.581 | 0.733 | 7.7E-159 | 1.2E-155 | Slc12a2        | 1.262 | 0.706 | 0.578 | 4.8E-43  | 7.2E-40  |
| Ifit1b1       | 1.446 | 0.487 | 0.470 | 6.4E-149 | 9.6E-146 | Adgre4         | 0.930 | 0.597 | 0.375 | 2.9E-42  | 4.4E-39  |
| Cxcl5         | 1.588 | 0.446 | 0.399 | 6.7E-125 | 1.0E-121 | Bst2           | 0.727 | 0.651 | 0.506 | 1.1E-30  | 1.7E-27  |
| Pigr          | 0.995 | 0.441 | 0.469 | 6.3E-68  | 9.5E-65  | Tmem176b       | 1.272 | 0.622 | 0.568 | 1.4E-22  | 2.1E-19  |
| Cxcl3         | 1.035 | 0.364 | 0.517 | 5.7E-03  | 1.0E+00  | Krt80          | 0.745 | 0.634 | 0.587 | 1.1E-20  | 1.6E-17  |
| <b>Neu-1</b>  |       |       |       |          |          | <b>B cells</b> |       |       |       |          |          |
| Cst3          | 1.532 | 0.929 | 0.800 | 0.0E+00  | 0.0E+00  | Igkc           | 4.317 | 0.964 | 0.279 | 0.0E+00  | 0.0E+00  |
| Gngt2         | 1.374 | 0.812 | 0.614 | 0.0E+00  | 0.0E+00  | Ighm           | 3.141 | 0.908 | 0.317 | 0.0E+00  | 0.0E+00  |
| Id2           | 1.172 | 0.925 | 0.753 | 0.0E+00  | 0.0E+00  | Cd74           | 3.059 | 0.992 | 0.554 | 0.0E+00  | 0.0E+00  |
| Ptgs1         | 1.172 | 0.772 | 0.678 | 0.0E+00  | 0.0E+00  | H2-Ab1         | 2.828 | 0.975 | 0.628 | 0.0E+00  | 0.0E+00  |
| Laptm5        | 0.838 | 0.829 | 0.722 | 0.0E+00  | 0.0E+00  | H2-Aa          | 2.789 | 0.983 | 0.554 | 0.0E+00  | 0.0E+00  |
| Gm19951       | 0.675 | 0.840 | 0.656 | 0.0E+00  | 0.0E+00  | Cd79a          | 2.550 | 0.908 | 0.408 | 0.0E+00  | 0.0E+00  |
| Ccl4          | 0.552 | 0.895 | 0.685 | 0.0E+00  | 0.0E+00  | Cd79b          | 2.207 | 0.854 | 0.309 | 0.0E+00  | 0.0E+00  |
| Hist1h1e      | 0.491 | 0.794 | 0.590 | 0.0E+00  | 0.0E+00  | Ebf1           | 2.190 | 0.862 | 0.157 | 0.0E+00  | 0.0E+00  |
| Asprv1        | 0.446 | 0.778 | 0.552 | 0.0E+00  | 0.0E+00  | Igic2          | 2.133 | 0.870 | 0.147 | 0.0E+00  | 0.0E+00  |
| Egr2          | 0.310 | 0.274 | 0.401 | 3.3E-290 | 5.0E-287 | Cd72           | 1.409 | 0.846 | 0.159 | 0.0E+00  | 0.0E+00  |
| B930036N10Ri  | 0.499 | 0.642 | 0.468 | 1.2E-283 | 1.8E-280 | Serpina3g      | 0.465 | 0.972 | 0.560 | 0.0E+00  | 0.0E+00  |
| Id1           | 1.043 | 0.832 | 0.665 | 4.7E-266 | 7.1E-263 | Gatm           | 0.355 | 0.992 | 0.516 | 0.0E+00  | 0.0E+00  |
| Gpx1          | 0.848 | 0.869 | 0.830 | 3.8E-265 | 5.7E-262 | Ighd           | 2.304 | 0.799 | 0.270 | 1.4E-299 | 2.1E-296 |
| Ms4a6d        | 0.565 | 0.805 | 0.725 | 7.4E-254 | 1.1E-250 | Gm15987        | 0.802 | 0.838 | 0.255 | 1.2E-273 | 1.9E-270 |
| Csf1r         | 0.366 | 0.280 | 0.483 | 9.3E-226 | 1.4E-222 | Jchain         | 1.341 | 0.826 | 0.370 | 9.8E-271 | 1.5E-267 |
| Gpc3          | 0.286 | 0.688 | 0.670 | 3.7E-198 | 5.5E-195 | Ms4a1          | 1.914 | 0.819 | 0.197 | 6.8E-270 | 1.0E-266 |
| Cd300c2       | 1.210 | 0.716 | 0.649 | 5.2E-190 | 7.8E-187 | Ly6d           | 0.446 | 0.929 | 0.779 | 5.9E-245 | 8.9E-242 |
| Hist1h1d      | 0.253 | 0.697 | 0.533 | 8.4E-188 | 1.3E-184 | Rpl3           | 1.155 | 0.991 | 0.707 | 7.0E-233 | 1.1E-229 |
| Ptgs2         | 0.526 | 0.234 | 0.306 | 4.4E-180 | 6.6E-177 | Mef2c          | 1.562 | 0.830 | 0.381 | 8.7E-231 | 1.3E-227 |
| Pmaip1        | 0.518 | 0.787 | 0.662 | 1.1E-178 | 1.6E-175 | Bank1          | 1.757 | 0.792 | 0.348 | 2.6E-210 | 3.9E-207 |
| Ccl3          | 0.592 | 0.738 | 0.624 | 1.2E-148 | 1.8E-145 | Ptma           | 0.989 | 0.991 | 0.725 | 2.2E-205 | 3.3E-202 |
| Osgin1        | 0.724 | 0.685 | 0.570 | 7.6E-146 | 1.1E-142 | Igha           | 1.645 | 0.780 | 0.378 | 1.0E-200 | 1.5E-197 |
| Olr1          | 0.348 | 0.328 | 0.404 | 8.3E-139 | 1.2E-135 | Ighg1          | 1.025 | 0.772 | 0.364 | 8.7E-190 | 1.3E-186 |
| Pi16          | 0.312 | 0.619 | 0.443 | 4.3E-134 | 6.5E-131 | H2-DMa         | 0.962 | 0.810 | 0.392 | 7.6E-178 | 1.1E-174 |
| Hexb          | 0.810 | 0.794 | 0.746 | 4.2E-133 | 6.3E-130 | Fam96a         | 0.433 | 0.939 | 0.556 | 5.6E-177 | 8.5E-174 |
| Fcgr4         | 0.354 | 0.750 | 0.685 | 1.7E-126 | 2.6E-123 | Gpr65          | 0.440 | 0.838 | 0.448 | 3.8E-174 | 5.7E-171 |
| Bcl2a1d       | 0.547 | 0.380 | 0.543 | 1.6E-123 | 2.4E-120 | Igic3          | 1.588 | 0.712 | 0.157 | 2.9E-168 | 4.3E-165 |
| Cd63          | 0.327 | 0.866 | 0.768 | 2.9E-120 | 4.4E-117 | Napsa          | 1.338 | 0.843 | 0.582 | 3.3E-163 | 5.0E-160 |
| Ier3          | 0.771 | 0.802 | 0.786 | 5.3E-113 | 8.0E-110 | mt-Nd1         | 0.665 | 0.967 | 0.666 | 1.3E-152 | 1.9E-149 |
| Atp1a1        | 0.853 | 0.779 | 0.694 | 1.1E-110 | 1.7E-107 | Ets1           | 1.116 | 0.792 | 0.447 | 1.3E-150 | 1.9E-147 |
| Hk2           | 0.263 | 0.470 | 0.609 | 5.4E-104 | 8.0E-101 | Mzb1           | 1.617 | 0.728 | 0.330 | 2.9E-146 | 4.3E-143 |
| P2ry6         | 0.401 | 0.710 | 0.682 | 1.5E-100 | 2.3E-97  | Rps2           | 0.667 | 0.989 | 0.892 | 8.8E-135 | 1.3E-131 |
| Lrg1          | 0.265 | 0.765 | 0.686 | 1.4E-95  | 2.1E-92  | Fcmr           | 1.153 | 0.750 | 0.392 | 8.3E-132 | 1.2E-128 |
| Gm12840       | 1.099 | 0.321 | 0.411 | 2.0E-95  | 3.0E-92  | Gm31243        | 1.017 | 0.709 | 0.181 | 9.7E-121 | 1.5E-117 |
| H1f0          | 0.599 | 0.700 | 0.568 | 2.2E-87  | 3.3E-84  | H2-DMb2        | 1.138 | 0.718 | 0.272 | 2.2E-119 | 3.3E-116 |
| Naaa          | 0.359 | 0.655 | 0.568 | 4.8E-75  | 7.2E-72  | Ranbp1         | 0.695 | 0.826 | 0.642 | 4.2E-105 | 6.4E-102 |
| Ltc4s         | 0.796 | 0.644 | 0.599 | 1.2E-72  | 1.9E-69  | Gm8369         | 0.449 | 0.297 | 0.105 | 1.4E-101 | 2.1E-98  |
| Reep5         | 0.646 | 0.749 | 0.711 | 5.2E-55  | 7.9E-52  | Gimap6         | 1.256 | 0.710 | 0.321 | 1.5E-98  | 2.3E-95  |
| Egr1          | 0.842 | 0.617 | 0.544 | 1.1E-51  | 1.6E-48  | 4930523C07R    | 1.050 | 0.716 | 0.510 | 6.0E-92  | 9.0E-89  |
| Asah1         | 0.261 | 0.666 | 0.555 | 1.3E-49  | 2.0E-46  | Ptprcap        | 0.932 | 0.716 | 0.524 | 7.3E-82  | 1.1E-78  |
| Gm2a          | 0.855 | 0.637 | 0.632 | 1.0E-45  | 1.5E-42  | Cd55           | 0.849 | 0.734 | 0.433 | 3.2E-81  | 4.8E-78  |
| Hist1h4i      | 1.255 | 0.646 | 0.671 | 1.8E-45  | 2.8E-42  | Fcer2a         | 1.434 | 0.669 | 0.501 | 4.6E-75  | 6.9E-72  |
| Chil1         | 0.513 | 0.593 | 0.475 | 2.1E-43  | 3.2E-40  | Erp29          | 0.518 | 0.910 | 0.710 | 1.4E-73  | 2.1E-70  |
| Tgm2          | 0.664 | 0.463 | 0.641 | 5.8E-43  | 8.6E-40  | Pax5           | 0.985 | 0.641 | 0.212 | 3.4E-73  | 5.1E-70  |

|              |       |       |       |          |          |                 |       |       |       |          |          |         |
|--------------|-------|-------|-------|----------|----------|-----------------|-------|-------|-------|----------|----------|---------|
| Dpep2        | 0.374 | 0.652 | 0.687 | 7.8E-43  | 1.2E-39  | Ndufa4          | 0.509 | 0.843 | 0.667 | 4.6E-69  | 6.9E-66  |         |
| Ctsa         | 0.381 | 0.744 | 0.697 | 2.0E-42  | 2.9E-39  | Sdc4            | 0.893 | 0.745 | 0.674 | 2.2E-67  | 3.3E-64  |         |
| Fgd4         | 0.251 | 0.688 | 0.624 | 1.5E-41  | 2.3E-38  | Tnfrsf13c       | 0.888 | 0.622 | 0.177 | 2.7E-67  | 4.1E-64  |         |
| Fam20c       | 0.442 | 0.792 | 0.763 | 5.8E-41  | 8.7E-38  | Scd1            | 1.063 | 0.661 | 0.348 | 8.6E-65  | 1.3E-61  |         |
| Pou2f2       | 0.312 | 0.387 | 0.444 | 1.9E-34  | 2.9E-31  | Hmg1            | 0.833 | 0.723 | 0.652 | 7.2E-61  | 1.1E-57  |         |
| Cks2         | 1.189 | 0.534 | 0.460 | 3.2E-33  | 4.8E-30  | Hspe1           | 0.691 | 0.777 | 0.674 | 5.8E-60  | 8.7E-57  |         |
| Rhoc         | 0.380 | 0.529 | 0.605 | 3.6E-33  | 5.3E-30  | Hes1            | 0.392 | 0.338 | 0.532 | 7.1E-59  | 1.1E-55  |         |
| Fyb          | 0.514 | 0.751 | 0.686 | 7.6E-32  | 1.1E-28  | Pxdc1           | 0.899 | 0.660 | 0.339 | 2.1E-58  | 3.2E-55  |         |
| Fcgr2b       | 0.347 | 0.713 | 0.648 | 2.8E-31  | 4.1E-28  | Cd180           | 0.448 | 0.352 | 0.326 | 1.2E-54  | 1.8E-51  |         |
| C3           | 0.875 | 0.585 | 0.551 | 5.4E-30  | 8.1E-27  | Pgls            | 0.647 | 0.753 | 0.634 | 2.2E-54  | 3.3E-51  |         |
| Slc7a11      | 0.272 | 0.428 | 0.478 | 6.5E-28  | 9.7E-25  | Nap111          | 0.555 | 0.726 | 0.561 | 1.5E-44  | 2.2E-41  |         |
| Hist1h1c     | 0.763 | 0.664 | 0.606 | 5.7E-26  | 8.5E-23  | Blk             | 0.482 | 0.380 | 0.328 | 1.6E-43  | 2.3E-40  |         |
| Tcirg1       | 0.280 | 0.550 | 0.636 | 9.7E-26  | 1.5E-22  | Bcar3           | 0.432 | 0.387 | 0.408 | 3.1E-43  | 4.7E-40  |         |
| Abca1        | 0.438 | 0.768 | 0.731 | 1.2E-25  | 1.7E-22  | Gimap3          | 0.924 | 0.632 | 0.218 | 1.3E-42  | 2.0E-39  |         |
| Rgs1         | 1.284 | 0.650 | 0.628 | 1.6E-25  | 2.4E-22  | AC149090.1      | 1.234 | 0.659 | 0.455 | 1.3E-41  | 1.9E-38  |         |
| Csf2rb       | 0.693 | 0.676 | 0.689 | 3.6E-25  | 5.5E-22  | Irf8            | 0.826 | 0.671 | 0.638 | 8.6E-38  | 1.3E-34  |         |
| Bcl2a1b      | 0.872 | 0.640 | 0.631 | 2.0E-23  | 2.9E-20  | Pou2f2          | 0.590 | 0.656 | 0.428 | 5.8E-36  | 8.7E-33  |         |
| Ccng1        | 0.266 | 0.520 | 0.595 | 7.3E-23  | 1.1E-19  | Ms4a4c          | 0.498 | 0.386 | 0.143 | 8.2E-36  | 1.2E-32  |         |
| Agap1        | 0.867 | 0.586 | 0.610 | 2.6E-22  | 3.9E-19  | Tubb5           | 0.433 | 0.727 | 0.599 | 1.1E-33  | 1.7E-30  |         |
| Erp29        | 0.301 | 0.600 | 0.739 | 1.2E-21  | 1.7E-18  | Ly86            | 0.735 | 0.619 | 0.293 | 8.3E-27  | 1.2E-23  |         |
| Slc6a6       | 0.338 | 0.463 | 0.522 | 2.5E-21  | 3.7E-18  | Aldh2           | 0.584 | 0.639 | 0.517 | 2.6E-26  | 3.9E-23  |         |
| Tnf          | 0.725 | 0.327 | 0.308 | 9.4E-19  | 1.4E-15  | S1pr1           | 0.415 | 0.391 | 0.514 | 1.3E-24  | 1.9E-21  |         |
| Hist1h2ap    | 0.263 | 0.508 | 0.479 | 6.2E-18  | 9.3E-15  | Id3             | 0.855 | 0.605 | 0.569 | 1.8E-24  | 2.7E-21  |         |
| Gm20186      | 0.564 | 0.404 | 0.440 | 6.6E-18  | 9.9E-15  | Pou2af1         | 1.186 | 0.585 | 0.245 | 5.4E-24  | 8.1E-21  |         |
| Cfp          | 0.354 | 0.543 | 0.434 | 1.4E-17  | 2.2E-14  | Lmo2            | 0.870 | 0.616 | 0.400 | 1.0E-23  | 1.5E-20  |         |
| Unc93b1      | 0.643 | 0.570 | 0.512 | 3.2E-16  | 4.8E-13  | Gimap1          | 0.903 | 0.615 | 0.455 | 3.2E-23  | 4.9E-20  |         |
| Ptma         | 0.282 | 0.760 | 0.728 | 3.5E-15  | 5.2E-12  | C1qbp           | 0.416 | 0.684 | 0.663 | 3.0E-22  | 4.5E-19  |         |
| Itgax        | 0.746 | 0.468 | 0.563 | 2.5E-14  | 3.8E-11  | Slc25a4         | 0.458 | 0.662 | 0.537 | 2.2E-21  | 3.3E-18  |         |
| Aprt         | 0.365 | 0.639 | 0.761 | 2.1E-12  | 3.1E-09  | Gimap7          | 0.681 | 0.581 | 0.231 | 4.9E-21  | 7.3E-18  |         |
| Itgb2        | 0.303 | 0.503 | 0.614 | 2.2E-12  | 3.3E-09  | Myo1e           | 0.370 | 0.454 | 0.610 | 3.7E-20  | 5.5E-17  |         |
| Ucp2         | 0.280 | 0.743 | 0.732 | 4.5E-11  | 6.8E-08  | Siglecg         | 0.415 | 0.590 | 0.505 | 4.4E-17  | 6.6E-14  |         |
| Bcl2a1a      | 0.956 | 0.592 | 0.547 | 7.5E-10  | 1.1E-06  | Eprs            | 0.470 | 0.654 | 0.584 | 2.2E-16  | 3.3E-13  |         |
| Arhgap25     | 0.475 | 0.546 | 0.497 | 4.7E-08  | 7.1E-05  | Nucks1          | 0.526 | 0.636 | 0.534 | 2.7E-15  | 4.0E-12  |         |
| G0s2         | 0.960 | 0.524 | 0.494 | 1.9E-06  | 2.8E-03  | Plekho1         | 0.670 | 0.621 | 0.557 | 1.2E-14  | 1.9E-11  |         |
| Gm26870      | 0.339 | 0.577 | 0.569 | 5.6E-05  | 8.3E-02  | Zbtb20          | 0.422 | 0.454 | 0.546 | 7.7E-14  | 1.2E-10  |         |
| Cdkn1a       | 0.436 | 0.825 | 0.760 | 5.5E-04  | 8.2E-01  | Evl             | 0.561 | 0.600 | 0.343 | 3.7E-13  | 5.6E-10  |         |
| Tgfb         | 0.656 | 0.586 | 0.616 | 5.7E-04  | 8.5E-01  | Snx5            | 0.608 | 0.621 | 0.551 | 2.3E-12  | 3.5E-09  |         |
| Mpeg1        | 0.405 | 0.595 | 0.629 | 6.4E-04  | 9.6E-01  | Ciita           | 0.638 | 0.441 | 0.281 | 1.7E-11  | 2.6E-08  |         |
| Csf2ra       | 0.674 | 0.543 | 0.575 | 1.5E-03  | 1.0E+00  | Blnk            | 0.663 | 0.596 | 0.738 | 2.1E-10  | 3.2E-07  |         |
| Tnfrsf23     | 0.465 | 0.654 | 0.712 | 5.8E-03  | 1.0E+00  | Sptbn1          | 0.654 | 0.623 | 0.580 | 6.2E-10  | 9.3E-07  |         |
| <b>Neu-2</b> |       |       |       |          |          | Igcl1           | 1.620 | 0.546 | 0.204 | 9.9E-09  | 1.5E-05  |         |
| Gm5483       | 2.762 | 0.938 | 0.564 | 0.0E+00  | 0.0E+00  | Ms4a6c          | 0.618 | 0.593 | 0.418 | 1.4E-08  | 2.1E-05  |         |
| BC100530     | 2.671 | 0.815 | 0.520 | 0.0E+00  | 0.0E+00  | Cd2ap           | 0.534 | 0.624 | 0.597 | 1.7E-08  | 2.6E-05  |         |
| Wfdc17       | 2.485 | 0.993 | 0.744 | 0.0E+00  | 0.0E+00  | Cd69            | 0.605 | 0.558 | 0.334 | 5.9E-08  | 8.8E-05  |         |
| Cxcl2        | 2.340 | 0.951 | 0.469 | 0.0E+00  | 0.0E+00  | Ms4a6b          | 0.387 | 0.469 | 0.280 | 2.3E-07  | 3.4E-04  |         |
| Ifitm1       | 2.087 | 0.963 | 0.701 | 0.0E+00  | 0.0E+00  | Bin1            | 0.731 | 0.578 | 0.566 | 2.8E-07  | 4.2E-04  |         |
| Retnlg       | 2.057 | 0.960 | 0.576 | 0.0E+00  | 0.0E+00  | Kcnq1ot1        | 0.583 | 0.624 | 0.657 | 3.6E-07  | 5.4E-04  |         |
| Wfdc21       | 1.768 | 0.945 | 0.605 | 0.0E+00  | 0.0E+00  | Odc1            | 0.433 | 0.478 | 0.572 | 3.6E-07  | 5.4E-04  |         |
| Lrg1         | 1.760 | 0.929 | 0.661 | 0.0E+00  | 0.0E+00  | Vpreb3          | 1.232 | 0.539 | 0.135 | 4.7E-07  | 7.1E-04  |         |
| G0s2         | 1.756 | 0.819 | 0.446 | 0.0E+00  | 0.0E+00  | Nr4a1           | 0.505 | 0.424 | 0.317 | 1.1E-06  | 1.7E-03  |         |
| Egr1         | 1.705 | 0.912 | 0.497 | 0.0E+00  | 0.0E+00  | Rftn1           | 0.435 | 0.495 | 0.627 | 2.7E-06  | 4.1E-03  |         |
| Lcn2         | 1.667 | 0.911 | 0.561 | 0.0E+00  | 0.0E+00  | Pdia4           | 0.591 | 0.566 | 0.537 | 7.0E-06  | 1.1E-02  |         |
| Ier3         | 1.643 | 0.972 | 0.758 | 0.0E+00  | 0.0E+00  | Gpr171          | 0.531 | 0.481 | 0.578 | 3.9E-05  | 5.9E-02  |         |
| Slpi         | 1.397 | 0.904 | 0.602 | 0.0E+00  | 0.0E+00  | Ikzf3           | 0.915 | 0.544 | 0.267 | 4.1E-05  | 6.2E-02  |         |
| Adam8        | 1.286 | 0.729 | 0.572 | 0.0E+00  | 0.0E+00  | Gpr183          | 0.771 | 0.535 | 0.267 | 4.2E-04  | 6.2E-01  |         |
| Ccl4         | 1.276 | 0.981 | 0.676 | 0.0E+00  | 0.0E+00  | Cd38            | 0.484 | 0.588 | 0.584 | 8.6E-03  | 1.0E+00  |         |
| F630028O10Ri | 1.234 | 0.798 | 0.503 | 0.0E+00  | 0.0E+00  | <b>Lung Ep.</b> | Il33  | 1.978 | 0.892 | 0.537    | 0.0E+00  | 0.0E+00 |
| Sifn4        | 1.160 | 0.942 | 0.505 | 0.0E+00  | 0.0E+00  | Areg            | 1.182 | 0.853 | 0.425 | 1.7E-291 | 2.6E-288 |         |
| Id1          | 0.989 | 0.915 | 0.655 | 0.0E+00  | 0.0E+00  | Fxyd3           | 2.925 | 0.930 | 0.612 | 1.3E-275 | 2.0E-272 |         |
| Csf2rb       | 0.976 | 0.921 | 0.648 | 0.0E+00  | 0.0E+00  | Wfdc2           | 4.063 | 0.911 | 0.760 | 1.7E-275 | 2.5E-272 |         |
| Steap4       | 0.965 | 0.732 | 0.447 | 0.0E+00  | 0.0E+00  | Col1a1          | 1.424 | 0.721 | 0.220 | 4.9E-249 | 7.3E-246 |         |
| Hcar2        | 0.955 | 0.882 | 0.648 | 0.0E+00  | 0.0E+00  | Dapl1           | 1.474 | 0.823 | 0.391 | 1.1E-243 | 1.6E-240 |         |
| Prok2        | 0.868 | 0.790 | 0.548 | 0.0E+00  | 0.0E+00  | Col1a2          | 1.973 | 0.756 | 0.381 | 8.7E-239 | 1.3E-235 |         |
| Olfm4        | 0.701 | 0.793 | 0.426 | 0.0E+00  | 0.0E+00  | Btb3            | 1.083 | 0.834 | 0.570 | 1.3E-220 | 1.9E-217 |         |
| Dgat2        | 0.563 | 0.795 | 0.603 | 0.0E+00  | 0.0E+00  | Ly6d            | 1.756 | 0.948 | 0.779 | 8.8E-220 | 1.3E-216 |         |
| Tceal9       | 0.557 | 0.888 | 0.641 | 0.0E+00  | 0.0E+00  | Hspb1           | 1.934 | 0.823 | 0.582 | 6.5E-217 | 9.7E-214 |         |
| Cxcl3        | 0.533 | 0.840 | 0.429 | 0.0E+00  | 0.0E+00  | Wfdc3           | 1.449 | 0.821 | 0.682 | 5.9E-205 | 8.8E-202 |         |
| Cd177        | 0.461 | 0.740 | 0.458 | 0.0E+00  | 0.0E+00  | Ckmt1           | 1.370 | 0.883 | 0.732 | 1.1E-200 | 1.7E-197 |         |
| Tnfrsf23     | 0.440 | 0.910 | 0.668 | 0.0E+00  | 0.0E+00  | Gpx2            | 1.928 | 0.819 | 0.571 | 1.7E-198 | 2.6E-195 |         |
| Hk2          | 0.430 | 0.884 | 0.536 | 0.0E+00  | 0.0E+00  | Cdh1            | 1.240 | 0.859 | 0.604 | 1.2E-197 | 1.8E-194 |         |
| Ccl6         | 0.398 | 0.910 | 0.592 | 0.0E+00  | 0.0E+00  | Tmem176a        | 2.040 | 0.873 | 0.582 | 7.6E-197 | 1.1E-193 |         |
| Cdkn1a       | 0.298 | 0.945 | 0.742 | 0.0E+00  | 0.0E+00  | Ehf             | 2.134 | 0.855 | 0.799 | 5.1E-196 | 7.6E-193 |         |
| Rgcc         | 0.260 | 0.926 | 0.710 | 0.0E+00  | 0.0E+00  | Gsta4           | 2.610 | 0.871 | 0.705 | 1.8E-191 | 2.7E-188 |         |
| Slc7a11      | 0.868 | 0.715 | 0.429 | 1.1E-307 | 1.6E-304 | Them5           | 1.260 | 0.732 | 0.268 | 1.7E-187 | 2.5E-184 |         |
| Mmp8         | 0.729 | 0.731 | 0.597 | 8.0E-292 | 1.2E-288 | Cldn7           | 1.072 | 0.896 | 0.684 | 1.1E-182 | 1.6E-179 |         |
| Stfa211      | 2.238 | 0.682 | 0.448 | 1.4E-272 | 2.1E-269 |                 |       |       |       |          |          |         |

|               |       |       |       |          |          |           |       |       |       |          |          |
|---------------|-------|-------|-------|----------|----------|-----------|-------|-------|-------|----------|----------|
| Osgin1        | 0.516 | 0.765 | 0.560 | 5.6E-269 | 8.5E-266 | Clu       | 2.509 | 0.912 | 0.787 | 1.7E-182 | 2.5E-179 |
| Stfa2         | 1.396 | 0.680 | 0.497 | 3.6E-261 | 5.4E-258 | Api1      | 1.828 | 0.900 | 0.732 | 2.4E-182 | 3.6E-179 |
| Il1f9         | 0.937 | 0.718 | 0.534 | 1.0E-248 | 1.6E-245 | Cp        | 1.550 | 0.766 | 0.560 | 1.4E-168 | 2.1E-165 |
| Gadd45a       | 0.936 | 0.731 | 0.606 | 1.1E-241 | 1.7E-238 | Cald1     | 1.304 | 0.837 | 0.684 | 1.2E-164 | 1.8E-161 |
| Ifitm3        | 0.397 | 0.844 | 0.679 | 2.8E-228 | 4.3E-225 | Mgp       | 2.757 | 0.817 | 0.644 | 3.8E-162 | 5.7E-159 |
| Hip1          | 0.280 | 0.812 | 0.586 | 5.1E-221 | 7.7E-218 | Cbr2      | 3.030 | 0.806 | 0.745 | 6.7E-160 | 1.0E-156 |
| Ifitm6        | 0.479 | 0.683 | 0.435 | 1.5E-216 | 2.2E-213 | Ybx3      | 1.340 | 0.857 | 0.598 | 6.7E-160 | 1.0E-156 |
| Chil1         | 0.781 | 0.691 | 0.462 | 2.0E-216 | 2.9E-213 | Far1      | 1.422 | 0.882 | 0.509 | 6.9E-160 | 1.0E-156 |
| Asprv1        | 1.206 | 0.707 | 0.570 | 1.3E-199 | 1.9E-196 | Plac8     | 1.530 | 0.919 | 0.554 | 8.7E-160 | 1.3E-156 |
| Tgm2          | 0.428 | 0.758 | 0.587 | 5.2E-159 | 7.8E-156 | Serping1  | 1.481 | 0.693 | 0.306 | 5.8E-159 | 8.7E-156 |
| Acod1         | 0.849 | 0.624 | 0.389 | 1.6E-127 | 2.5E-124 | Akr1b3    | 1.620 | 0.866 | 0.517 | 1.5E-157 | 2.2E-154 |
| Fyb           | 0.331 | 0.786 | 0.682 | 1.7E-118 | 2.6E-115 | Cd81      | 1.439 | 0.922 | 0.607 | 1.0E-155 | 1.5E-152 |
| Saa3          | 0.560 | 0.748 | 0.606 | 4.7E-83  | 7.1E-80  | Scgb1a1   | 3.980 | 0.915 | 0.811 | 7.6E-155 | 1.1E-151 |
| Ly6g          | 0.520 | 0.596 | 0.425 | 4.1E-82  | 6.1E-79  | Id3       | 1.470 | 0.769 | 0.565 | 1.6E-149 | 2.5E-146 |
| Tgfb1         | 0.391 | 0.696 | 0.596 | 1.9E-80  | 2.8E-77  | Perp      | 1.659 | 0.834 | 0.733 | 1.2E-147 | 1.8E-144 |
| Gm5416        | 0.363 | 0.605 | 0.486 | 5.7E-76  | 8.5E-73  | Ppp1r14b  | 1.481 | 0.892 | 0.660 | 6.9E-146 | 1.0E-142 |
| Pi16          | 0.460 | 0.605 | 0.450 | 1.1E-70  | 1.6E-67  | Tpm2      | 1.173 | 0.815 | 0.658 | 4.9E-138 | 7.4E-135 |
| Fcgr4         | 0.341 | 0.715 | 0.693 | 1.4E-60  | 2.0E-57  | Ceacam1   | 1.300 | 0.918 | 0.689 | 2.4E-135 | 3.5E-132 |
| Slc6a6        | 0.335 | 0.651 | 0.489 | 4.4E-51  | 6.6E-48  | Igfbp4    | 1.213 | 0.714 | 0.516 | 3.6E-125 | 5.4E-122 |
| Csf2ra        | 0.339 | 0.671 | 0.553 | 1.6E-47  | 2.4E-44  | Rpl3      | 1.482 | 0.892 | 0.712 | 1.4E-118 | 2.1E-115 |
| Fgd4          | 0.308 | 0.677 | 0.628 | 5.9E-39  | 8.9E-36  | Ptprf     | 1.412 | 0.746 | 0.622 | 2.3E-117 | 3.4E-114 |
| Stfa3         | 0.456 | 0.528 | 0.544 | 1.1E-08  | 1.7E-05  | Rps2      | 1.263 | 0.934 | 0.894 | 1.5E-115 | 2.2E-112 |
| Hacd4         | 0.323 | 0.496 | 0.524 | 8.5E-08  | 1.3E-04  | Nenf      | 1.188 | 0.790 | 0.520 | 6.5E-109 | 9.7E-106 |
| Ptgs2         | 0.592 | 0.407 | 0.275 | 1.3E-07  | 2.0E-04  | Arg1      | 1.174 | 0.919 | 0.760 | 1.7E-105 | 2.6E-102 |
| Fosb          | 0.422 | 0.476 | 0.366 | 3.8E-03  | 1.0E+00  | Nedd4     | 1.526 | 0.696 | 0.323 | 1.8E-105 | 2.8E-102 |
| <b>Neu-3</b>  |       |       |       |          |          | Dmkn      | 1.828 | 0.776 | 0.719 | 1.0E-104 | 1.6E-101 |
| Ccl3          | 2.965 | 0.920 | 0.610 | 0.0E+00  | 0.0E+00  | Fabp5     | 2.134 | 0.923 | 0.803 | 7.8E-103 | 1.2E-99  |
| Hcar2         | 2.705 | 0.884 | 0.657 | 0.0E+00  | 0.0E+00  | Gm26870   | 1.224 | 0.813 | 0.564 | 1.2E-101 | 1.8E-98  |
| Ccl4          | 2.320 | 0.868 | 0.702 | 0.0E+00  | 0.0E+00  | Ein       | 1.022 | 0.671 | 0.350 | 3.1E-100 | 4.6E-97  |
| Nceh1         | 2.161 | 0.856 | 0.686 | 0.0E+00  | 0.0E+00  | Scgb3a1   | 4.567 | 0.740 | 0.635 | 1.2E-99  | 1.8E-96  |
| Gadd45b       | 2.109 | 0.877 | 0.741 | 0.0E+00  | 0.0E+00  | Pam       | 1.544 | 0.788 | 0.651 | 1.9E-97  | 2.9E-94  |
| lfrd1         | 1.995 | 0.819 | 0.702 | 0.0E+00  | 0.0E+00  | Aqp5      | 1.174 | 0.777 | 0.728 | 4.3E-96  | 6.5E-93  |
| Hilpda        | 1.887 | 0.836 | 0.728 | 0.0E+00  | 0.0E+00  | Phlda1    | 1.105 | 0.823 | 0.551 | 4.7E-95  | 7.1E-92  |
| Atp6v1c1      | 1.859 | 0.857 | 0.741 | 0.0E+00  | 0.0E+00  | Prdx2     | 1.395 | 0.805 | 0.642 | 2.1E-89  | 3.1E-86  |
| Zeb2          | 1.831 | 0.829 | 0.607 | 0.0E+00  | 0.0E+00  | Epcam     | 1.512 | 0.786 | 0.644 | 4.0E-89  | 6.0E-86  |
| Cd63          | 1.769 | 0.936 | 0.766 | 0.0E+00  | 0.0E+00  | Dcxr      | 1.400 | 0.768 | 0.619 | 4.5E-87  | 6.8E-84  |
| Ftl1          | 1.745 | 1.000 | 0.953 | 0.0E+00  | 0.0E+00  | Serpinb6b | 1.063 | 0.769 | 0.688 | 5.7E-86  | 8.6E-83  |
| Id2           | 1.629 | 0.874 | 0.771 | 0.0E+00  | 0.0E+00  | Rbp1      | 1.619 | 0.722 | 0.552 | 4.9E-85  | 7.3E-82  |
| F10           | 1.608 | 0.863 | 0.694 | 0.0E+00  | 0.0E+00  | Muc5b     | 2.403 | 0.675 | 0.506 | 7.2E-84  | 1.1E-80  |
| Ctsz          | 1.414 | 0.936 | 0.780 | 0.0E+00  | 0.0E+00  | Scd1      | 1.002 | 0.226 | 0.360 | 1.4E-83  | 2.2E-80  |
| Ctsb          | 1.241 | 0.977 | 0.941 | 0.0E+00  | 0.0E+00  | Tsc22d1   | 1.408 | 0.780 | 0.747 | 1.2E-81  | 1.9E-78  |
| Gas2l3        | 1.116 | 0.818 | 0.634 | 0.0E+00  | 0.0E+00  | Socs2     | 1.111 | 0.732 | 0.667 | 2.5E-80  | 3.8E-77  |
| Dhfr          | 0.942 | 0.789 | 0.739 | 0.0E+00  | 0.0E+00  | Selenbp1  | 2.144 | 0.707 | 0.645 | 4.2E-80  | 6.3E-77  |
| Lhfp12        | 0.915 | 0.784 | 0.664 | 0.0E+00  | 0.0E+00  | Krt8      | 1.959 | 0.720 | 0.698 | 5.2E-77  | 7.9E-74  |
| Ctsd          | 0.494 | 0.987 | 0.963 | 0.0E+00  | 0.0E+00  | Atp5g1    | 1.265 | 0.834 | 0.645 | 8.9E-76  | 1.3E-72  |
| Fcgr2b        | 0.726 | 0.838 | 0.637 | 1.2E-307 | 1.8E-304 | Prdx1     | 1.233 | 0.822 | 0.667 | 1.8E-74  | 2.6E-71  |
| Chka          | 0.537 | 0.738 | 0.519 | 3.0E-302 | 4.5E-299 | Stfb      | 1.227 | 0.664 | 0.439 | 2.9E-74  | 4.4E-71  |
| H2-Eb1        | 1.000 | 0.683 | 0.519 | 1.0E-285 | 1.5E-282 | Retnla    | 1.246 | 0.738 | 0.750 | 1.6E-71  | 2.3E-68  |
| Cd274         | 1.549 | 0.725 | 0.579 | 2.4E-265 | 3.6E-262 | Nfib      | 1.180 | 0.680 | 0.619 | 2.7E-70  | 4.1E-67  |
| Plcx2         | 0.637 | 0.728 | 0.653 | 3.2E-265 | 4.8E-262 | Aldh1a1   | 1.071 | 0.648 | 0.384 | 9.0E-69  | 1.3E-65  |
| Hexa          | 0.947 | 0.839 | 0.688 | 1.1E-248 | 1.7E-245 | Nupr1     | 1.463 | 0.795 | 0.711 | 1.2E-68  | 1.8E-65  |
| Dock10        | 0.893 | 0.783 | 0.666 | 2.7E-239 | 4.1E-236 | Ifitm3    | 1.335 | 0.809 | 0.700 | 6.7E-68  | 1.0E-64  |
| Pdxk          | 0.597 | 0.726 | 0.574 | 7.5E-236 | 1.1E-232 | Sdc4      | 1.174 | 0.760 | 0.674 | 1.7E-65  | 2.5E-62  |
| Cxcl2         | 1.230 | 0.759 | 0.512 | 6.9E-233 | 1.0E-229 | Cldn3     | 1.119 | 0.776 | 0.778 | 5.3E-64  | 8.0E-61  |
| Psap          | 0.760 | 0.852 | 0.749 | 1.3E-230 | 1.9E-227 | Scd2      | 1.073 | 0.705 | 0.541 | 6.5E-63  | 9.7E-60  |
| Gns           | 1.339 | 0.782 | 0.688 | 1.3E-230 | 2.0E-227 | Timp3     | 1.525 | 0.657 | 0.569 | 1.1E-59  | 1.6E-56  |
| Lamp1         | 1.194 | 0.885 | 0.861 | 2.6E-229 | 3.9E-226 | Scgb3a2   | 2.769 | 0.668 | 0.618 | 4.3E-58  | 6.5E-55  |
| Atf3          | 1.754 | 0.679 | 0.548 | 3.1E-224 | 4.7E-221 | Dbi       | 1.376 | 0.776 | 0.646 | 7.1E-52  | 1.1E-48  |
| Npc1          | 1.211 | 0.749 | 0.677 | 5.2E-220 | 7.8E-217 | Tmem176b  | 1.986 | 0.660 | 0.567 | 2.6E-51  | 3.9E-48  |
| Ccnf          | 0.536 | 0.662 | 0.612 | 4.8E-210 | 7.3E-207 | Sdc1      | 1.649 | 0.700 | 0.709 | 1.3E-43  | 2.0E-40  |
| Plekha2       | 1.096 | 0.785 | 0.726 | 1.7E-206 | 2.5E-203 | Cyp2f2    | 2.315 | 0.663 | 0.704 | 2.5E-42  | 3.7E-39  |
| Rgs1          | 1.675 | 0.774 | 0.615 | 1.1E-205 | 1.6E-202 | Bgn       | 1.569 | 0.550 | 0.243 | 1.1E-39  | 1.7E-36  |
| Ier3          | 1.085 | 0.810 | 0.786 | 1.8E-195 | 2.7E-192 | Trf       | 1.356 | 0.684 | 0.507 | 1.6E-37  | 2.5E-34  |
| 9130230L23Rik | 0.335 | 0.648 | 0.524 | 1.2E-192 | 1.8E-189 | Wfdc18    | 1.473 | 0.361 | 0.563 | 6.2E-34  | 9.4E-31  |
| P2rx7         | 0.626 | 0.760 | 0.609 | 9.9E-177 | 1.5E-173 | Sparc     | 2.443 | 0.542 | 0.358 | 1.0E-32  | 1.6E-29  |
| Fam20c        | 0.499 | 0.847 | 0.758 | 1.7E-170 | 2.6E-167 | Foxq1     | 1.159 | 0.583 | 0.537 | 2.1E-25  | 3.2E-22  |
| Gstm1         | 0.562 | 0.697 | 0.550 | 1.0E-164 | 1.6E-161 | Tff2      | 1.506 | 0.544 | 0.381 | 1.1E-24  | 1.7E-21  |
| Hmox1         | 1.389 | 0.790 | 0.754 | 7.4E-133 | 1.1E-129 | Ndufc2    | 1.065 | 0.660 | 0.625 | 1.1E-23  | 1.7E-20  |
| Aprt          | 0.932 | 0.820 | 0.731 | 3.6E-132 | 5.4E-129 | Chchd10   | 1.241 | 0.644 | 0.644 | 2.8E-22  | 4.3E-19  |
| Tnfrsf12a     | 0.301 | 0.721 | 0.595 | 1.8E-125 | 2.7E-122 | Igfbp5    | 1.952 | 0.347 | 0.441 | 9.8E-22  | 1.5E-18  |
| Tpp1          | 0.909 | 0.716 | 0.608 | 4.3E-113 | 6.5E-110 | Ccnd1     | 1.370 | 0.572 | 0.514 | 2.1E-19  | 3.2E-16  |
| Inhba         | 0.910 | 0.622 | 0.550 | 4.4E-112 | 6.5E-109 | Tagln2    | 1.084 | 0.659 | 0.593 | 5.6E-18  | 8.5E-15  |
| Tst           | 0.398 | 0.688 | 0.590 | 1.2E-95  | 1.9E-92  | Hmg1      | 1.450 | 0.616 | 0.655 | 9.1E-17  | 1.4E-13  |
| Tcirg1        | 1.119 | 0.670 | 0.616 | 9.4E-90  | 1.4E-86  | Snhg18    | 1.056 | 0.551 | 0.593 | 1.2E-10  | 1.7E-07  |
| Canx          | 0.712 | 0.769 | 0.666 | 1.2E-87  | 1.8E-84  | C3        | 1.081 | 0.651 | 0.554 | 3.2E-06  | 4.8E-03  |
| Mpeg1         | 0.696 | 0.701 | 0.614 | 6.5E-80  | 9.7E-77  |           |       |       |       |          |          |

|                |          |       |       |         |         |                  |          |       |       |          |          |          |
|----------------|----------|-------|-------|---------|---------|------------------|----------|-------|-------|----------|----------|----------|
| Tmem86a        | 0.586    | 0.724 | 0.687 | 1.8E-78 | 2.7E-75 | Tst              | 1.319    | 0.571 | 0.602 | 1.0E-05  | 1.6E-02  |          |
| Osm            | 0.502    | 0.286 | 0.341 | 5.9E-76 | 8.8E-73 | Pmepa1           | 1.556    | 0.563 | 0.622 | 5.8E-05  | 8.7E-02  |          |
| C3             | 0.873    | 0.632 | 0.548 | 3.4E-72 | 5.1E-69 | Fmo2             | 1.044    | 0.413 | 0.343 | 2.5E-04  | 3.8E-01  |          |
| Slc7a11        | 1.622    | 0.565 | 0.458 | 4.8E-70 | 7.2E-67 | Crip2            | 1.269    | 0.502 | 0.560 | 1.6E-03  | 1.0E+00  |          |
| Acod1          | 1.455    | 0.548 | 0.408 | 1.2E-65 | 1.8E-62 | Igfbp7           | 1.823    | 0.413 | 0.473 | 5.7E-03  | 1.0E+00  |          |
| Ftl1-ps1       | 0.517    | 0.338 | 0.440 | 5.7E-65 | 8.5E-62 | Sftpd            | 1.945    | 0.489 | 0.461 | 8.2E-03  | 1.0E+00  |          |
| Naglu          | 0.833    | 0.616 | 0.547 | 7.7E-61 | 1.2E-57 | <b>T cells 2</b> | Ccl5     | 6.355 | 0.988 | 0.505    | 0.0E+00  | 0.0E+00  |
| Gm5416         | 0.294    | 0.605 | 0.491 | 3.2E-55 | 4.8E-52 | Nkg7             | 4.438    | 0.997 | 0.532 | 0.0E+00  | 0.0E+00  |          |
| Prok2          | 0.362    | 0.643 | 0.575 | 3.5E-50 | 5.2E-47 | AW112010         | 3.298    | 0.997 | 0.502 | 0.0E+00  | 0.0E+00  |          |
| Cd300c2        | 0.878    | 0.675 | 0.658 | 2.2E-49 | 3.3E-46 | Cd3g             | 2.927    | 0.963 | 0.453 | 0.0E+00  | 0.0E+00  |          |
| Hk2            | 0.718    | 0.466 | 0.600 | 6.9E-44 | 1.0E-40 | Klrd1            | 2.649    | 0.930 | 0.383 | 0.0E+00  | 0.0E+00  |          |
| Slc43a3        | 0.347    | 0.577 | 0.585 | 8.1E-44 | 1.2E-40 | Gimap4           | 2.407    | 0.904 | 0.222 | 0.0E+00  | 0.0E+00  |          |
| Creg1          | 1.161    | 0.702 | 0.668 | 6.8E-39 | 1.0E-35 | Cxcr6            | 2.039    | 0.977 | 0.308 | 0.0E+00  | 0.0E+00  |          |
| Cldn1          | 0.605    | 0.582 | 0.623 | 1.3E-37 | 2.0E-34 | Ikzf3            | 1.577    | 0.956 | 0.261 | 0.0E+00  | 0.0E+00  |          |
| Hspa1b         | 0.760    | 0.659 | 0.609 | 2.5E-37 | 3.8E-34 | Pdcd1            | 1.413    | 0.989 | 0.234 | 0.0E+00  | 0.0E+00  |          |
| G0s2           | 0.733    | 0.597 | 0.488 | 6.5E-37 | 9.7E-34 | Rgs16            | 0.578    | 0.966 | 0.464 | 0.0E+00  | 0.0E+00  |          |
| Tgm2           | 0.386    | 0.453 | 0.630 | 1.1E-35 | 1.7E-32 | Bcl2             | 2.127    | 0.963 | 0.426 | 1.1E-305 | 1.6E-302 |          |
| Ctsa           | 0.424    | 0.748 | 0.700 | 1.5E-35 | 2.2E-32 | Klre1            | 1.502    | 0.905 | 0.518 | 5.3E-294 | 8.0E-291 |          |
| Cxcr1          | 0.882    | 0.643 | 0.718 | 9.1E-35 | 1.4E-31 | Gimap1           | 2.138    | 0.918 | 0.450 | 1.1E-276 | 1.6E-273 |          |
| Gadd45g        | 0.961    | 0.634 | 0.584 | 2.1E-31 | 3.2E-28 | Ptprcap          | 2.054    | 0.919 | 0.521 | 6.8E-265 | 1.0E-261 |          |
| Cd68           | 0.694    | 0.714 | 0.715 | 6.3E-31 | 9.4E-28 | Gzma             | 3.710    | 0.885 | 0.291 | 3.3E-263 | 5.0E-260 |          |
| Tnfrsf23       | 0.997    | 0.661 | 0.707 | 8.2E-31 | 1.2E-27 | Serpib9          | 1.165    | 0.887 | 0.348 | 3.6E-245 | 5.4E-242 |          |
| Hal            | 0.570    | 0.514 | 0.710 | 1.2E-30 | 1.8E-27 | Wls              | 1.997    | 0.925 | 0.525 | 5.8E-242 | 8.8E-239 |          |
| Syng1          | 0.408    | 0.721 | 0.777 | 1.4E-28 | 2.0E-25 | Ctsw             | 2.064    | 0.826 | 0.206 | 9.3E-235 | 1.4E-231 |          |
| Ptgs2          | 0.446    | 0.299 | 0.293 | 4.0E-27 | 6.0E-24 | Gpr171           | 0.922    | 0.902 | 0.568 | 2.0E-234 | 3.1E-231 |          |
| Slc37a2        | 0.659    | 0.609 | 0.589 | 5.6E-27 | 8.4E-24 | Camk2n1          | 0.674    | 0.893 | 0.584 | 6.5E-232 | 9.8E-229 |          |
| Dpp7           | 0.410    | 0.624 | 0.628 | 5.7E-25 | 8.6E-22 | Klrb1c           | 0.994    | 0.792 | 0.241 | 1.3E-217 | 2.0E-214 |          |
| Laptm5         | 0.357    | 0.748 | 0.739 | 3.4E-23 | 5.1E-20 | Thy1             | 1.399    | 0.805 | 0.194 | 2.8E-212 | 4.2E-209 |          |
| Hpgds          | 0.365    | 0.680 | 0.634 | 4.8E-21 | 7.2E-18 | Itga1            | 1.174    | 0.858 | 0.540 | 2.9E-207 | 4.3E-204 |          |
| Rps6ka2        | 0.407    | 0.521 | 0.487 | 7.5E-20 | 1.1E-16 | Lck              | 1.936    | 0.843 | 0.282 | 9.4E-198 | 1.4E-194 |          |
| Slc6a6         | 0.352    | 0.448 | 0.520 | 6.6E-18 | 9.9E-15 | Cd3e             | 1.702    | 0.850 | 0.307 | 4.9E-196 | 7.4E-193 |          |
| Syne1          | 0.775    | 0.511 | 0.619 | 2.1E-17 | 3.1E-14 | Bin1             | 1.028    | 0.889 | 0.559 | 4.2E-175 | 6.3E-172 |          |
| Vegfa          | 0.957    | 0.495 | 0.433 | 7.9E-17 | 1.2E-13 | Rpl3             | 1.327    | 0.992 | 0.710 | 1.8E-173 | 2.7E-170 |          |
| Asprv1         | 0.304    | 0.639 | 0.584 | 1.2E-14 | 1.8E-11 | mt-Nd1           | 1.057    | 0.991 | 0.669 | 1.2E-168 | 1.8E-165 |          |
| Sqstm1         | 0.695    | 0.608 | 0.639 | 3.5E-14 | 5.2E-11 | Ctla2a           | 1.995    | 0.849 | 0.746 | 4.1E-167 | 6.2E-164 |          |
| Tnf            | 0.606    | 0.311 | 0.311 | 1.1E-12 | 1.6E-09 | Gbp4             | 0.491    | 0.908 | 0.599 | 6.1E-164 | 9.2E-161 |          |
| Gm26870        | 0.659    | 0.567 | 0.570 | 1.1E-11 | 1.7E-08 | Skap1            | 1.419    | 0.785 | 0.187 | 8.8E-160 | 1.3E-156 |          |
| Hspa9          | 0.318    | 0.651 | 0.648 | 1.1E-09 | 1.6E-06 | Lgals1           | 1.245    | 0.915 | 0.575 | 1.1E-159 | 1.6E-156 |          |
| Osgin1         | 0.594    | 0.500 | 0.600 | 5.8E-08 | 8.7E-05 | Gimap3           | 1.887    | 0.779 | 0.219 | 8.9E-157 | 1.3E-153 |          |
| Cst2rb         | 0.453    | 0.681 | 0.687 | 7.0E-07 | 1.1E-03 | Gpr65            | 0.821    | 0.870 | 0.451 | 4.5E-153 | 6.7E-150 |          |
| Egr1           | 0.431    | 0.574 | 0.554 | 8.2E-07 | 1.2E-03 | Ets1             | 1.314    | 0.838 | 0.449 | 9.4E-153 | 1.4E-149 |          |
| Dhrs3          | 0.461    | 0.674 | 0.676 | 1.1E-06 | 1.7E-03 | Ptma             | 1.057    | 0.983 | 0.728 | 1.0E-151 | 1.5E-148 |          |
| Thbs1          | 1.309    | 0.451 | 0.550 | 7.4E-06 | 1.1E-02 | Il2rb            | 1.677    | 0.756 | 0.242 | 1.1E-147 | 1.7E-144 |          |
| Cdkn1a         | 0.339    | 0.776 | 0.770 | 4.9E-05 | 7.3E-02 | Crip1            | 0.729    | 0.947 | 0.503 | 4.0E-140 | 5.9E-137 |          |
| Gadd45a        | 0.424    | 0.639 | 0.622 | 1.8E-04 | 2.6E-01 | Hspe1            | 0.981    | 0.928 | 0.671 | 4.3E-139 | 6.5E-136 |          |
| Hist1h4i       | 0.531    | 0.648 | 0.669 | 3.2E-04 | 4.8E-01 | Gzmb             | 2.047    | 0.733 | 0.217 | 1.6E-136 | 2.4E-133 |          |
| Slpi           | 0.477    | 0.653 | 0.644 | 3.7E-04 | 5.5E-01 | Bcl2a1d          | 0.761    | 0.902 | 0.508 | 6.0E-129 | 9.1E-126 |          |
| Ddit3          | 0.444    | 0.598 | 0.758 | 3.7E-04 | 5.6E-01 | Ly9              | 0.743    | 0.798 | 0.321 | 9.2E-125 | 1.4E-121 |          |
| Il1f9          | 0.929    | 0.529 | 0.564 | 5.8E-04 | 8.7E-01 | Laptm5           | 0.968    | 0.994 | 0.735 | 1.4E-124 | 2.2E-121 |          |
| Sirpa          | 0.299    | 0.560 | 0.634 | 5.2E-03 | 1.0E+00 | Trbc2            | 2.552    | 0.763 | 0.257 | 3.1E-120 | 4.7E-117 |          |
| <b>T cells</b> | Cd3g     | 2.602 | 0.918 | 0.436   | 0.0E+00 | 0.0E+00          | Gimap6   | 1.119 | 0.771 | 0.323    | 5.1E-115 | 7.7E-112 |
|                | Trbc2    | 2.530 | 0.904 | 0.229   | 0.0E+00 | 0.0E+00          | Rps2     | 0.852 | 0.998 | 0.893    | 4.5E-114 | 6.7E-111 |
|                | Il7r     | 2.308 | 0.820 | 0.669   | 0.0E+00 | 0.0E+00          | Trac     | 1.458 | 0.734 | 0.151    | 8.0E-114 | 1.2E-110 |
|                | Bcl2     | 2.093 | 0.817 | 0.414   | 0.0E+00 | 0.0E+00          | AU020206 | 0.620 | 0.934 | 0.698    | 2.9E-110 | 4.4E-107 |
|                | Rpl3     | 1.972 | 0.988 | 0.699   | 0.0E+00 | 0.0E+00          | Irf8     | 0.532 | 0.853 | 0.635    | 3.3E-106 | 4.9E-103 |
|                | Cd3e     | 1.953 | 0.856 | 0.286   | 0.0E+00 | 0.0E+00          | H2afz    | 0.948 | 0.944 | 0.804    | 2.5E-104 | 3.7E-101 |
|                | Cd3d     | 1.904 | 0.890 | 0.375   | 0.0E+00 | 0.0E+00          | Ccnd2    | 1.530 | 0.785 | 0.608    | 3.8E-104 | 5.7E-101 |
|                | Ptprcap  | 1.902 | 0.828 | 0.511   | 0.0E+00 | 0.0E+00          | Dut      | 0.533 | 0.774 | 0.448    | 1.5E-98  | 2.3E-95  |
|                | Gimap1   | 1.875 | 0.851 | 0.436   | 0.0E+00 | 0.0E+00          | Emp3     | 0.746 | 0.876 | 0.460    | 5.1E-97  | 7.6E-94  |
|                | Cxcr6    | 1.867 | 0.946 | 0.284   | 0.0E+00 | 0.0E+00          | Id2      | 0.628 | 0.977 | 0.778    | 1.4E-96  | 2.0E-93  |
|                | Ctla2a   | 1.782 | 0.926 | 0.738   | 0.0E+00 | 0.0E+00          | Ebpl     | 0.549 | 0.782 | 0.407    | 2.9E-88  | 4.4E-85  |
|                | Trac     | 1.722 | 0.781 | 0.126   | 0.0E+00 | 0.0E+00          | Ndufa4   | 0.747 | 0.879 | 0.668    | 4.0E-88  | 6.0E-85  |
|                | Gimap3   | 1.701 | 0.790 | 0.197   | 0.0E+00 | 0.0E+00          | Cd2      | 1.412 | 0.725 | 0.421    | 1.2E-85  | 1.8E-82  |
|                | AW112010 | 1.634 | 0.891 | 0.489   | 0.0E+00 | 0.0E+00          | Ilf47    | 0.906 | 0.766 | 0.648    | 1.7E-82  | 2.6E-79  |
|                | Ets1     | 1.568 | 0.849 | 0.434   | 0.0E+00 | 0.0E+00          | Klrk1    | 1.640 | 0.666 | 0.100    | 2.0E-81  | 3.0E-78  |
|                | Ms4a6b   | 1.553 | 0.803 | 0.254   | 0.0E+00 | 0.0E+00          | Serpib6b | 0.741 | 0.769 | 0.688    | 8.2E-73  | 1.2E-69  |
|                | Skap1    | 1.513 | 0.806 | 0.163   | 0.0E+00 | 0.0E+00          | Cx3cr1   | 0.855 | 0.716 | 0.365    | 3.6E-72  | 5.4E-69  |
|                | Lck      | 1.488 | 0.779 | 0.264   | 0.0E+00 | 0.0E+00          | Reep5    | 0.686 | 0.904 | 0.713    | 1.6E-71  | 2.4E-68  |
|                | Ramp1    | 1.368 | 0.783 | 0.405   | 0.0E+00 | 0.0E+00          | Pla2g16  | 0.823 | 0.780 | 0.548    | 3.0E-65  | 4.5E-62  |
|                | Rps2     | 1.301 | 0.993 | 0.889   | 0.0E+00 | 0.0E+00          | Racgap1  | 0.500 | 0.689 | 0.255    | 1.8E-63  | 2.7E-60  |
|                | Nkg7     | 1.264 | 0.876 | 0.521   | 0.0E+00 | 0.0E+00          | Cd7      | 1.311 | 0.653 | 0.123    | 3.7E-59  | 5.5E-56  |
|                | Ptma     | 1.233 | 0.983 | 0.718   | 0.0E+00 | 0.0E+00          | F2r      | 1.007 | 0.699 | 0.655    | 1.7E-57  | 2.5E-54  |
|                | Maf      | 1.184 | 0.936 | 0.701   | 0.0E+00 | 0.0E+00          | Iitm2c   | 0.598 | 0.789 | 0.595    | 2.3E-57  | 3.5E-54  |
|                | Thy1     | 1.172 | 0.878 | 0.165   | 0.0E+00 | 0.0E+00          | Maf      | 0.484 | 0.773 | 0.713    | 6.1E-56  | 9.2E-53  |
|                | Hspe1    | 1.096 | 0.879 | 0.665   | 0.0E+00 | 0.0E+00          | Sh2d1a   | 1.028 | 0.637 | 0.160    | 4.7E-49  | 7.0E-46  |

|               |       |       |       |          |          |                    |       |       |       |          |          |
|---------------|-------|-------|-------|----------|----------|--------------------|-------|-------|-------|----------|----------|
| Ccl5          | 1.061 | 0.893 | 0.492 | 0.0E+00  | 0.0E+00  | Cd3d               | 1.570 | 0.660 | 0.399 | 1.5E-48  | 2.3E-45  |
| Pdcd1         | 1.058 | 0.965 | 0.206 | 0.0E+00  | 0.0E+00  | Nme1               | 0.638 | 0.798 | 0.715 | 6.0E-44  | 9.0E-41  |
| Icos          | 1.040 | 0.721 | 0.224 | 0.0E+00  | 0.0E+00  | Cd48               | 1.146 | 0.658 | 0.445 | 9.0E-42  | 1.3E-38  |
| Il2rb         | 0.938 | 0.822 | 0.219 | 0.0E+00  | 0.0E+00  | Pycard             | 0.597 | 0.864 | 0.778 | 3.7E-39  | 5.5E-36  |
| Trdc          | 0.926 | 0.888 | 0.260 | 0.0E+00  | 0.0E+00  | Zbp1               | 0.508 | 0.708 | 0.633 | 3.6E-36  | 5.5E-33  |
| Ikzf3         | 0.876 | 0.895 | 0.238 | 0.0E+00  | 0.0E+00  | Itgb7              | 0.911 | 0.655 | 0.528 | 4.8E-34  | 7.2E-31  |
| F2r           | 0.833 | 0.807 | 0.646 | 0.0E+00  | 0.0E+00  | Gimap7             | 1.216 | 0.618 | 0.234 | 2.7E-31  | 4.0E-28  |
| mt-Nd1        | 0.778 | 0.971 | 0.657 | 0.0E+00  | 0.0E+00  | Tmem160            | 0.727 | 0.687 | 0.583 | 2.4E-28  | 3.7E-25  |
| Tcrg-C1       | 0.619 | 0.895 | 0.175 | 0.0E+00  | 0.0E+00  | Phf11b             | 0.550 | 0.623 | 0.316 | 8.7E-28  | 1.3E-24  |
| Cd163l1       | 0.484 | 0.811 | 0.167 | 0.0E+00  | 0.0E+00  | Dock10             | 0.734 | 0.696 | 0.678 | 3.1E-27  | 4.7E-24  |
| Camk2n1       | 0.476 | 0.974 | 0.567 | 0.0E+00  | 0.0E+00  | Klra4              | 1.070 | 0.347 | 0.141 | 2.8E-26  | 4.2E-23  |
| Il2ra         | 0.462 | 0.861 | 0.138 | 0.0E+00  | 0.0E+00  | Kcnq1ot1           | 0.612 | 0.692 | 0.655 | 1.8E-18  | 2.6E-15  |
| Gbp4          | 0.441 | 0.879 | 0.589 | 0.0E+00  | 0.0E+00  | Nucks1             | 0.618 | 0.643 | 0.535 | 1.4E-17  | 2.1E-14  |
| AU020206      | 0.440 | 0.957 | 0.687 | 0.0E+00  | 0.0E+00  | Ranbp1             | 0.579 | 0.682 | 0.647 | 3.9E-15  | 5.9E-12  |
| Nrp1          | 0.439 | 0.886 | 0.725 | 0.0E+00  | 0.0E+00  | Trbc1              | 1.609 | 0.582 | 0.216 | 9.1E-15  | 1.4E-11  |
| Gpr171        | 0.417 | 0.782 | 0.562 | 3.2E-288 | 4.8E-285 | Osbp13             | 0.642 | 0.631 | 0.611 | 1.3E-13  | 1.9E-10  |
| S100a4        | 1.528 | 0.865 | 0.488 | 9.4E-267 | 1.4E-263 | AC149090.1         | 0.829 | 0.602 | 0.458 | 1.3E-12  | 2.0E-09  |
| Crip1         | 0.519 | 0.881 | 0.490 | 1.0E-230 | 1.6E-227 | Bcl11b             | 1.186 | 0.573 | 0.347 | 3.4E-12  | 5.1E-09  |
| Ctsw          | 0.610 | 0.694 | 0.191 | 3.5E-222 | 5.3E-219 | Sept9              | 0.475 | 0.618 | 0.475 | 1.9E-10  | 2.8E-07  |
| Slc25a4       | 0.912 | 0.791 | 0.526 | 7.1E-222 | 1.1E-218 | Il18r1             | 0.691 | 0.586 | 0.426 | 6.5E-10  | 9.8E-07  |
| Lat           | 0.926 | 0.715 | 0.457 | 1.0E-202 | 1.6E-199 | Il7r               | 0.709 | 0.631 | 0.679 | 2.1E-09  | 3.1E-06  |
| Gimap4        | 1.294 | 0.695 | 0.208 | 3.3E-200 | 5.0E-197 | S100a4             | 1.032 | 0.598 | 0.508 | 3.6E-09  | 5.4E-06  |
| Tcf7          | 0.897 | 0.659 | 0.050 | 2.1E-199 | 3.1E-196 | Ev1                | 0.553 | 0.597 | 0.346 | 4.4E-08  | 6.6E-05  |
| Gimap6        | 0.852 | 0.713 | 0.309 | 4.4E-194 | 6.6E-191 | Dok2               | 0.675 | 0.563 | 0.438 | 3.4E-07  | 5.0E-04  |
| Cd28          | 1.003 | 0.702 | 0.529 | 1.9E-184 | 2.8E-181 | Sms                | 0.505 | 0.435 | 0.441 | 5.8E-07  | 8.7E-04  |
| Bcl11b        | 1.081 | 0.686 | 0.332 | 1.0E-181 | 1.6E-178 | Ms4a6b             | 0.880 | 0.574 | 0.280 | 7.1E-07  | 1.1E-03  |
| Ebpl          | 0.434 | 0.744 | 0.395 | 1.2E-177 | 1.7E-174 | Ybx3               | 0.569 | 0.449 | 0.607 | 4.5E-06  | 6.7E-03  |
| Itgb7         | 1.071 | 0.709 | 0.520 | 5.7E-170 | 8.5E-167 | Cblb               | 0.518 | 0.449 | 0.632 | 7.0E-06  | 1.0E-02  |
| Wls           | 0.694 | 0.775 | 0.518 | 1.0E-164 | 1.6E-161 | Esyt1              | 0.697 | 0.566 | 0.420 | 1.5E-05  | 2.2E-02  |
| Cd2           | 1.084 | 0.694 | 0.411 | 6.8E-162 | 1.0E-158 | Sept11             | 0.805 | 0.568 | 0.594 | 8.0E-05  | 1.2E-01  |
| Gpr65         | 0.404 | 0.737 | 0.442 | 2.0E-150 | 3.0E-147 | Slamf7             | 0.845 | 0.534 | 0.547 | 8.7E-03  | 1.0E+00  |
| 4930523C07Ril | 0.862 | 0.693 | 0.505 | 1.3E-137 | 1.9E-134 | <b>Prol.</b> Pclaf | 2.491 | 0.958 | 0.145 | 0.0E+00  | 0.0E+00  |
| Pla2g16       | 0.610 | 0.767 | 0.540 | 8.1E-130 | 1.2E-126 | Tpx2               | 1.659 | 0.979 | 0.461 | 0.0E+00  | 0.0E+00  |
| Pgls          | 0.429 | 0.820 | 0.627 | 5.4E-121 | 8.1E-118 | Hmmr               | 1.416 | 0.965 | 0.417 | 0.0E+00  | 0.0E+00  |
| Dut           | 0.633 | 0.647 | 0.443 | 7.5E-88  | 1.1E-84  | Cks1b              | 1.929 | 0.966 | 0.434 | 5.1E-307 | 7.7E-304 |
| Cd7           | 0.448 | 0.374 | 0.119 | 7.0E-70  | 1.1E-66  | Ccnb1              | 1.412 | 0.897 | 0.279 | 9.5E-295 | 1.4E-291 |
| Ifi203        | 0.760 | 0.642 | 0.560 | 2.2E-69  | 3.3E-66  | Sp25               | 1.049 | 0.954 | 0.304 | 7.3E-293 | 1.1E-289 |
| Il18r1        | 0.468 | 0.359 | 0.433 | 9.1E-69  | 1.4E-65  | Stmn1              | 2.414 | 0.965 | 0.511 | 2.1E-290 | 3.1E-287 |
| Ranbp1        | 0.564 | 0.715 | 0.643 | 6.1E-68  | 9.1E-65  | Mki67              | 2.558 | 0.959 | 0.570 | 2.8E-289 | 4.3E-286 |
| Mllt3         | 0.629 | 0.666 | 0.631 | 2.6E-67  | 3.8E-64  | Nusap1             | 1.629 | 0.920 | 0.239 | 1.2E-271 | 1.7E-268 |
| Ar            | 0.464 | 0.380 | 0.208 | 8.1E-65  | 1.2E-61  | Cdca8              | 1.719 | 0.927 | 0.543 | 1.2E-265 | 1.8E-262 |
| Ccnd2         | 0.721 | 0.677 | 0.608 | 5.6E-64  | 8.3E-61  | Tuba1b             | 2.789 | 0.975 | 0.597 | 1.6E-247 | 2.4E-244 |
| Tmem176a      | 0.693 | 0.737 | 0.580 | 1.5E-62  | 2.3E-59  | Cenpe              | 1.483 | 0.904 | 0.409 | 3.6E-245 | 5.4E-242 |
| Igfbp4        | 0.442 | 0.371 | 0.530 | 4.0E-61  | 6.0E-58  | Racgap1            | 1.111 | 0.892 | 0.252 | 2.0E-234 | 3.0E-231 |
| Hmgn1         | 0.444 | 0.702 | 0.651 | 8.9E-57  | 1.3E-53  | Ptma               | 2.106 | 0.961 | 0.729 | 9.1E-234 | 1.4E-230 |
| Nucks1        | 0.698 | 0.651 | 0.530 | 2.2E-56  | 3.2E-53  | Lig1               | 1.309 | 0.922 | 0.604 | 1.5E-224 | 2.2E-221 |
| Ifi27l2a      | 0.810 | 0.649 | 0.527 | 1.1E-55  | 1.7E-52  | Comt               | 1.054 | 0.981 | 0.624 | 1.5E-214 | 2.2E-211 |
| Nrip1         | 0.824 | 0.664 | 0.612 | 7.0E-54  | 1.1E-50  | Fn1                | 1.115 | 0.950 | 0.408 | 2.4E-214 | 3.6E-211 |
| Esyt1         | 0.550 | 0.636 | 0.410 | 6.1E-53  | 9.1E-50  | Mt1                | 1.467 | 0.989 | 0.771 | 5.7E-214 | 8.6E-211 |
| Ifi47         | 0.471 | 0.662 | 0.649 | 1.9E-50  | 2.9E-47  | Tacc3              | 1.088 | 0.885 | 0.465 | 6.6E-212 | 1.0E-208 |
| Dock10        | 0.556 | 0.688 | 0.678 | 8.2E-47  | 1.2E-43  | Nucks1             | 2.033 | 0.961 | 0.529 | 6.2E-211 | 9.3E-208 |
| Trbc1         | 1.908 | 0.580 | 0.202 | 3.3E-44  | 4.9E-41  | H2afz              | 1.932 | 0.933 | 0.805 | 2.0E-204 | 3.0E-201 |
| C1qbp         | 0.468 | 0.666 | 0.664 | 9.5E-43  | 1.4E-39  | Tagln2             | 2.069 | 0.991 | 0.587 | 7.3E-196 | 1.1E-192 |
| Ms4a4b        | 0.952 | 0.551 | 0.088 | 2.1E-41  | 3.2E-38  | Snx5               | 1.077 | 0.986 | 0.545 | 5.5E-194 | 8.2E-191 |
| Gm12840       | 1.196 | 0.572 | 0.386 | 9.3E-39  | 1.4E-35  | Tubb5              | 2.638 | 0.927 | 0.597 | 1.1E-193 | 1.6E-190 |
| Gimap7        | 0.743 | 0.566 | 0.222 | 1.6E-32  | 2.4E-29  | Hmgn1              | 1.810 | 0.970 | 0.649 | 2.7E-191 | 4.0E-188 |
| Klk8          | 0.546 | 0.598 | 0.493 | 8.8E-32  | 1.3E-28  | Atad2              | 1.082 | 0.929 | 0.479 | 9.4E-191 | 1.4E-187 |
| Rexo2         | 0.515 | 0.636 | 0.637 | 1.1E-25  | 1.6E-22  | Ppp1r14b           | 1.888 | 0.981 | 0.660 | 1.3E-189 | 1.9E-186 |
| Zbtb20        | 0.641 | 0.604 | 0.540 | 1.0E-24  | 1.5E-21  | Lgals1             | 1.754 | 0.982 | 0.574 | 1.6E-188 | 2.4E-185 |
| Ev1           | 0.589 | 0.582 | 0.337 | 5.4E-18  | 8.2E-15  | Slc25a4            | 1.447 | 0.961 | 0.533 | 1.2E-185 | 1.8E-182 |
| Las1l         | 0.388 | 0.576 | 0.490 | 5.6E-17  | 8.4E-14  | Ccnb2              | 1.586 | 0.846 | 0.228 | 4.4E-185 | 6.7E-182 |
| Kcnq1ot1      | 0.582 | 0.619 | 0.658 | 8.6E-16  | 1.3E-12  | Hebp1              | 1.259 | 0.989 | 0.644 | 2.7E-183 | 4.1E-180 |
| S1pr1         | 0.739 | 0.552 | 0.507 | 8.8E-16  | 1.3E-12  | Ezh2               | 1.288 | 0.869 | 0.522 | 1.3E-180 | 2.0E-177 |
| Lef1          | 0.517 | 0.517 | 0.035 | 3.6E-14  | 5.4E-11  | Crip1              | 1.624 | 0.982 | 0.504 | 1.2E-176 | 1.8E-173 |
| Gpr183        | 0.598 | 0.436 | 0.265 | 9.7E-11  | 1.5E-07  | Tmem256            | 1.475 | 0.968 | 0.545 | 1.8E-173 | 2.7E-170 |
| Kcnn4         | 0.510 | 0.468 | 0.579 | 5.0E-10  | 7.6E-07  | Prdx1              | 1.850 | 0.996 | 0.665 | 5.2E-173 | 7.7E-170 |
| Gm8369        | 0.566 | 0.443 | 0.091 | 1.8E-09  | 2.8E-06  | Selenoh            | 1.849 | 0.871 | 0.469 | 1.9E-168 | 2.8E-165 |
| Tnfrsf8       | 0.669 | 0.451 | 0.396 | 5.5E-09  | 8.3E-06  | Cenpa              | 1.756 | 0.867 | 0.426 | 3.0E-166 | 4.4E-163 |
| Ramp3         | 0.410 | 0.540 | 0.413 | 1.2E-07  | 1.8E-04  | Cenpx              | 1.309 | 0.959 | 0.664 | 6.9E-165 | 1.0E-161 |
| Ccr2          | 0.445 | 0.449 | 0.261 | 4.5E-07  | 6.8E-04  | Rexo2              | 1.263 | 0.965 | 0.631 | 8.8E-164 | 1.3E-160 |
| Tmem160       | 0.367 | 0.600 | 0.584 | 5.6E-07  | 8.5E-04  | Ndufa4             | 2.100 | 0.982 | 0.667 | 3.8E-158 | 5.8E-155 |
| Dapl1         | 0.839 | 0.526 | 0.394 | 4.6E-06  | 6.9E-03  | Pycard             | 1.529 | 0.989 | 0.776 | 2.6E-157 | 4.0E-154 |
| Cblb          | 0.388 | 0.487 | 0.637 | 1.4E-04  | 2.1E-01  | Smc4               | 1.764 | 0.924 | 0.614 | 5.8E-155 | 8.7E-152 |
| Odc1          | 0.426 | 0.573 | 0.569 | 1.2E-03  | 1.0E+00  | Fabp5              | 1.449 | 0.993 | 0.803 | 1.1E-154 | 1.7E-151 |
| Tmem176b      | 0.675 | 0.581 | 0.569 | 5.8E-03  | 1.0E+00  | Cks2               | 1.430 | 0.931 | 0.464 | 1.4E-152 | 2.2E-149 |



|              |       |       |       |         |         |          |       |       |       |          |          |
|--------------|-------|-------|-------|---------|---------|----------|-------|-------|-------|----------|----------|
| Igfbp4       | 0.442 | 0.371 | 0.530 | 4.0E-61 | 6.0E-58 | Racgap1  | 1.111 | 0.892 | 0.252 | 2.0E-234 | 3.0E-231 |
| Hmgn1        | 0.444 | 0.702 | 0.651 | 8.9E-57 | 1.3E-53 | Ptma     | 2.106 | 0.961 | 0.729 | 9.1E-234 | 1.4E-230 |
| Nucks1       | 0.698 | 0.651 | 0.530 | 2.2E-56 | 3.2E-53 | Lig1     | 1.309 | 0.922 | 0.604 | 1.5E-224 | 2.2E-221 |
| Ifi2712a     | 0.810 | 0.649 | 0.527 | 1.1E-55 | 1.7E-52 | Comt     | 1.054 | 0.981 | 0.624 | 1.5E-214 | 2.2E-211 |
| Nrip1        | 0.824 | 0.664 | 0.612 | 7.0E-54 | 1.1E-50 | Fn1      | 1.115 | 0.950 | 0.408 | 2.4E-214 | 3.6E-211 |
| Esyt1        | 0.550 | 0.636 | 0.410 | 6.1E-53 | 9.1E-50 | Mt1      | 1.467 | 0.989 | 0.771 | 5.7E-214 | 8.6E-211 |
| Ifi47        | 0.471 | 0.662 | 0.649 | 1.9E-50 | 2.9E-47 | Tacc3    | 1.088 | 0.885 | 0.465 | 6.6E-212 | 1.0E-208 |
| Dock10       | 0.556 | 0.688 | 0.678 | 8.2E-47 | 1.2E-43 | Nucks1   | 2.033 | 0.961 | 0.529 | 6.2E-211 | 9.3E-208 |
| Trbc1        | 1.908 | 0.580 | 0.202 | 3.3E-44 | 4.9E-41 | H2afz    | 1.932 | 0.933 | 0.805 | 2.0E-204 | 3.0E-201 |
| C1qbp        | 0.468 | 0.666 | 0.664 | 9.5E-43 | 1.4E-39 | Tagln2   | 2.069 | 0.991 | 0.587 | 7.3E-196 | 1.1E-192 |
| Ms4a4b       | 0.952 | 0.551 | 0.088 | 2.1E-41 | 3.2E-38 | Snx5     | 1.077 | 0.986 | 0.545 | 5.5E-194 | 8.2E-191 |
| Gm12840      | 1.196 | 0.572 | 0.386 | 9.3E-39 | 1.4E-35 | Tubb5    | 2.638 | 0.927 | 0.597 | 1.1E-193 | 1.6E-190 |
| Gimap7       | 0.743 | 0.566 | 0.222 | 1.6E-32 | 2.4E-29 | Hmgn1    | 1.810 | 0.970 | 0.649 | 2.7E-191 | 4.0E-188 |
| Klk8         | 0.546 | 0.598 | 0.493 | 8.8E-32 | 1.3E-28 | Atad2    | 1.082 | 0.929 | 0.479 | 9.4E-191 | 1.4E-187 |
| Rexo2        | 0.515 | 0.636 | 0.637 | 1.1E-25 | 1.6E-22 | Ppp1r14b | 1.888 | 0.981 | 0.660 | 1.3E-189 | 1.9E-186 |
| Zbtb20       | 0.641 | 0.604 | 0.540 | 1.0E-24 | 1.5E-21 | Lgals1   | 1.754 | 0.982 | 0.574 | 1.6E-188 | 2.4E-185 |
| Evi          | 0.589 | 0.582 | 0.337 | 5.4E-18 | 8.2E-15 | Slc25a4  | 1.447 | 0.961 | 0.533 | 1.2E-185 | 1.8E-182 |
| Las1l        | 0.388 | 0.576 | 0.490 | 5.6E-17 | 8.4E-14 | Ccnb2    | 1.586 | 0.846 | 0.228 | 4.4E-185 | 6.7E-182 |
| Kcnq1ot1     | 0.582 | 0.619 | 0.658 | 8.6E-16 | 1.3E-12 | Hebp1    | 1.259 | 0.989 | 0.644 | 2.7E-183 | 4.1E-180 |
| S1pr1        | 0.739 | 0.552 | 0.507 | 8.8E-16 | 1.3E-12 | Ezh2     | 1.288 | 0.869 | 0.522 | 1.3E-180 | 2.0E-177 |
| Lef1         | 0.517 | 0.517 | 0.035 | 3.6E-14 | 5.4E-11 | Crip1    | 1.624 | 0.982 | 0.504 | 1.2E-176 | 1.8E-173 |
| Gpr183       | 0.598 | 0.436 | 0.265 | 9.7E-11 | 1.5E-07 | Tmem256  | 1.475 | 0.968 | 0.545 | 1.8E-173 | 2.7E-170 |
| Kcnn4        | 0.510 | 0.468 | 0.579 | 5.0E-10 | 7.6E-07 | Prdx1    | 1.850 | 0.996 | 0.665 | 5.2E-173 | 7.7E-170 |
| Gm8369       | 0.566 | 0.443 | 0.091 | 1.8E-09 | 2.8E-06 | Selenoh  | 1.849 | 0.871 | 0.469 | 1.9E-168 | 2.8E-165 |
| Tnfrsf8      | 0.669 | 0.451 | 0.396 | 5.5E-09 | 8.3E-06 | Cenpa    | 1.756 | 0.867 | 0.426 | 3.0E-166 | 4.4E-163 |
| Ramp3        | 0.410 | 0.540 | 0.413 | 1.2E-07 | 1.8E-04 | Cenpx    | 1.309 | 0.959 | 0.664 | 6.9E-165 | 1.0E-161 |
| Ccr2         | 0.445 | 0.449 | 0.261 | 4.5E-07 | 6.8E-04 | Rexo2    | 1.263 | 0.965 | 0.631 | 8.8E-164 | 1.3E-160 |
| Tmem160      | 0.367 | 0.600 | 0.584 | 5.6E-07 | 8.5E-04 | Ndufa4   | 2.100 | 0.982 | 0.667 | 3.8E-158 | 5.8E-155 |
| Dapl1        | 0.839 | 0.526 | 0.394 | 4.6E-06 | 6.9E-03 | Pycard   | 1.529 | 0.989 | 0.776 | 2.6E-157 | 4.0E-154 |
| Cblb         | 0.388 | 0.487 | 0.637 | 1.4E-04 | 2.1E-01 | Smc4     | 1.764 | 0.924 | 0.614 | 5.8E-155 | 8.7E-152 |
| Odc1         | 0.426 | 0.573 | 0.569 | 1.2E-03 | 1.0E+00 | Fabp5    | 1.449 | 0.993 | 0.803 | 1.1E-154 | 1.7E-151 |
| Tmem176b     | 0.675 | 0.581 | 0.569 | 5.8E-03 | 1.0E+00 | Cks2     | 1.430 | 0.931 | 0.464 | 1.4E-152 | 2.2E-149 |
| <b>Mac 1</b> |       |       |       |         |         | Nap111   | 1.688 | 0.954 | 0.558 | 1.7E-148 | 2.5E-145 |
| ApoE         | 3.645 | 0.999 | 0.776 | 0.0E+00 | 0.0E+00 | Hspa9    | 1.285 | 0.938 | 0.643 | 9.9E-148 | 1.5E-144 |
| Ctss         | 3.156 | 1.000 | 0.646 | 0.0E+00 | 0.0E+00 | Nme1     | 1.906 | 0.965 | 0.712 | 1.0E-146 | 1.5E-143 |
| Fn1          | 3.070 | 0.961 | 0.389 | 0.0E+00 | 0.0E+00 | Prdx2    | 1.788 | 0.940 | 0.640 | 2.6E-141 | 3.9E-138 |
| Lyz2         | 2.912 | 1.000 | 0.750 | 0.0E+00 | 0.0E+00 | Rpl3     | 1.645 | 0.952 | 0.712 | 2.0E-140 | 3.0E-137 |
| Trem2        | 2.398 | 0.999 | 0.563 | 0.0E+00 | 0.0E+00 | Rps2     | 1.458 | 0.940 | 0.894 | 2.3E-130 | 3.5E-127 |
| Lgals1       | 2.386 | 1.000 | 0.559 | 0.0E+00 | 0.0E+00 | Spp1     | 1.101 | 0.991 | 0.788 | 3.2E-128 | 4.8E-125 |
| Spp1         | 2.356 | 0.996 | 0.780 | 0.0E+00 | 0.0E+00 | Tubb4b   | 1.816 | 0.977 | 0.715 | 3.8E-128 | 5.6E-125 |
| Ma1b         | 2.251 | 0.977 | 0.576 | 0.0E+00 | 0.0E+00 | Cybb     | 1.037 | 0.947 | 0.519 | 8.9E-128 | 1.3E-124 |
| C1qa         | 2.202 | 0.980 | 0.573 | 0.0E+00 | 0.0E+00 | Vim      | 1.633 | 0.988 | 0.644 | 2.4E-125 | 3.5E-122 |
| Fabp5        | 2.165 | 0.994 | 0.796 | 0.0E+00 | 0.0E+00 | Mcm7     | 1.071 | 0.851 | 0.556 | 1.5E-124 | 2.2E-121 |
| C1qb         | 2.126 | 0.982 | 0.493 | 0.0E+00 | 0.0E+00 | Ybx3     | 1.869 | 0.865 | 0.599 | 1.9E-123 | 2.8E-120 |
| Psap         | 2.095 | 1.000 | 0.747 | 0.0E+00 | 0.0E+00 | Siva1    | 1.363 | 0.931 | 0.730 | 6.4E-120 | 9.6E-117 |
| Ctsl         | 2.035 | 0.999 | 0.840 | 0.0E+00 | 0.0E+00 | Pgls     | 1.338 | 0.950 | 0.632 | 5.3E-119 | 8.0E-116 |
| C1qc         | 2.002 | 0.983 | 0.633 | 0.0E+00 | 0.0E+00 | Ptms     | 1.038 | 0.988 | 0.620 | 2.7E-116 | 4.1E-113 |
| Gpnmb        | 1.975 | 0.994 | 0.642 | 0.0E+00 | 0.0E+00 | Fkbp2    | 1.125 | 0.931 | 0.533 | 4.2E-114 | 6.3E-111 |
| Vim          | 1.894 | 0.998 | 0.631 | 0.0E+00 | 0.0E+00 | Tyms     | 1.094 | 0.796 | 0.470 | 1.6E-111 | 2.5E-108 |
| Ms4a6c       | 1.887 | 0.981 | 0.393 | 0.0E+00 | 0.0E+00 | Lamtor4  | 1.288 | 0.982 | 0.702 | 9.9E-107 | 1.5E-103 |
| Emp3         | 1.866 | 0.993 | 0.440 | 0.0E+00 | 0.0E+00 | Hist1h4d | 1.284 | 0.839 | 0.676 | 1.0E-105 | 1.5E-102 |
| Plin2        | 1.859 | 1.000 | 0.843 | 0.0E+00 | 0.0E+00 | Dbi      | 1.394 | 0.936 | 0.644 | 2.0E-103 | 3.0E-100 |
| Cd68         | 1.847 | 0.999 | 0.699 | 0.0E+00 | 0.0E+00 | Top2a    | 2.140 | 0.749 | 0.304 | 1.5E-100 | 2.3E-97  |
| F13a1        | 1.817 | 0.892 | 0.611 | 0.0E+00 | 0.0E+00 | mt-Nd1   | 1.535 | 0.881 | 0.672 | 2.2E-98  | 3.2E-95  |
| Lgmn         | 1.795 | 0.994 | 0.615 | 0.0E+00 | 0.0E+00 | Birc5    | 2.119 | 0.756 | 0.487 | 3.7E-96  | 5.6E-93  |
| Gm           | 1.771 | 1.000 | 0.840 | 0.0E+00 | 0.0E+00 | Hsp90b1  | 1.288 | 0.991 | 0.786 | 4.3E-96  | 6.5E-93  |
| S100a4       | 1.755 | 0.940 | 0.486 | 0.0E+00 | 0.0E+00 | Cdca3    | 1.395 | 0.733 | 0.222 | 6.4E-91  | 9.6E-88  |
| Lrp1         | 1.691 | 0.995 | 0.503 | 0.0E+00 | 0.0E+00 | Reep5    | 1.089 | 0.966 | 0.713 | 1.3E-90  | 2.0E-87  |
| Ms4a7        | 1.620 | 0.981 | 0.421 | 0.0E+00 | 0.0E+00 | Gm26917  | 1.427 | 0.839 | 0.566 | 1.8E-88  | 2.7E-85  |
| mt-Nd1       | 1.606 | 0.996 | 0.658 | 0.0E+00 | 0.0E+00 | Aprt     | 1.160 | 0.943 | 0.737 | 1.0E-83  | 1.6E-80  |
| Hexa         | 1.594 | 0.999 | 0.688 | 0.0E+00 | 0.0E+00 | Gzma     | 1.044 | 0.791 | 0.294 | 5.1E-75  | 7.7E-72  |
| Npc2         | 1.576 | 1.000 | 0.885 | 0.0E+00 | 0.0E+00 | C1qbp    | 1.452 | 0.809 | 0.661 | 1.8E-71  | 2.7E-68  |
| Hexb         | 1.575 | 0.998 | 0.741 | 0.0E+00 | 0.0E+00 | Ranbp1   | 1.666 | 0.798 | 0.645 | 3.8E-71  | 5.8E-68  |
| Crip1        | 1.546 | 0.994 | 0.486 | 0.0E+00 | 0.0E+00 | Cdc20    | 1.193 | 0.713 | 0.484 | 2.7E-70  | 4.1E-67  |
| Lamp1        | 1.530 | 1.000 | 0.856 | 0.0E+00 | 0.0E+00 | Tmed3    | 1.101 | 0.873 | 0.617 | 4.5E-69  | 6.7E-66  |
| Saa3         | 1.523 | 0.868 | 0.613 | 0.0E+00 | 0.0E+00 | Pdia6    | 1.130 | 0.973 | 0.783 | 2.8E-67  | 4.2E-64  |
| Mgst1        | 1.502 | 0.992 | 0.589 | 0.0E+00 | 0.0E+00 | Cenpf    | 1.498 | 0.697 | 0.197 | 9.5E-65  | 1.4E-61  |
| Syng1        | 1.501 | 0.994 | 0.759 | 0.0E+00 | 0.0E+00 | Calr     | 1.114 | 0.973 | 0.770 | 1.3E-59  | 1.9E-56  |
| Ctsz         | 1.495 | 1.000 | 0.786 | 0.0E+00 | 0.0E+00 | Ramp1    | 1.043 | 0.756 | 0.421 | 6.4E-56  | 9.5E-53  |
| Ctsb         | 1.482 | 1.000 | 0.942 | 0.0E+00 | 0.0E+00 | Atp5g1   | 1.539 | 0.749 | 0.648 | 3.7E-50  | 5.5E-47  |
| Ccl9         | 1.476 | 0.919 | 0.528 | 0.0E+00 | 0.0E+00 | Hspd1    | 1.695 | 0.731 | 0.563 | 1.7E-49  | 2.6E-46  |
| C3ar1        | 1.475 | 0.992 | 0.552 | 0.0E+00 | 0.0E+00 | Igkc     | 2.677 | 0.216 | 0.301 | 7.5E-49  | 1.1E-45  |
| Pycard       | 1.449 | 0.984 | 0.769 | 0.0E+00 | 0.0E+00 | Igha     | 1.754 | 0.694 | 0.385 | 6.0E-45  | 9.0E-42  |
| Ctsd         | 1.430 | 1.000 | 0.964 | 0.0E+00 | 0.0E+00 | Hspe1    | 1.292 | 0.779 | 0.675 | 1.7E-44  | 2.6E-41  |
| Smpd13a      | 1.420 | 0.995 | 0.611 | 0.0E+00 | 0.0E+00 | Dtymk    | 1.346 | 0.694 | 0.574 | 2.7E-43  | 4.1E-40  |
| Anxa5        | 1.419 | 0.999 | 0.669 | 0.0E+00 | 0.0E+00 |          |       |       |       |          |          |

|               |       |       |       |          |          |              |       |       |       |          |          |
|---------------|-------|-------|-------|----------|----------|--------------|-------|-------|-------|----------|----------|
| Cybb          | 1.397 | 0.993 | 0.501 | 0.0E+00  | 0.0E+00  | Camp         | 4.266 | 0.267 | 0.373 | 3.4E-41  | 5.1E-38  |
| Ctsa          | 1.395 | 0.999 | 0.689 | 0.0E+00  | 0.0E+00  | Hist1h2ap    | 1.712 | 0.662 | 0.481 | 8.0E-37  | 1.2E-33  |
| Fcgr2b        | 1.362 | 0.991 | 0.641 | 0.0E+00  | 0.0E+00  | Erp29        | 1.042 | 0.758 | 0.715 | 5.1E-28  | 7.7E-25  |
| Ms4a6d        | 1.355 | 0.957 | 0.726 | 0.0E+00  | 0.0E+00  | Ube2c        | 1.866 | 0.621 | 0.424 | 1.2E-24  | 1.7E-21  |
| Ctsc          | 1.326 | 0.970 | 0.634 | 0.0E+00  | 0.0E+00  | Serpnb1a     | 1.100 | 0.363 | 0.542 | 1.4E-23  | 2.2E-20  |
| Rpl3          | 1.324 | 0.999 | 0.701 | 0.0E+00  | 0.0E+00  | Ngp          | 3.416 | 0.294 | 0.366 | 1.9E-22  | 2.8E-19  |
| Tmem256       | 1.321 | 0.978 | 0.530 | 0.0E+00  | 0.0E+00  | H2afx        | 1.423 | 0.598 | 0.441 | 1.4E-15  | 2.1E-12  |
| Erp29         | 1.320 | 0.994 | 0.701 | 0.0E+00  | 0.0E+00  | Prc1         | 1.160 | 0.595 | 0.429 | 2.0E-15  | 2.9E-12  |
| Lrpap1        | 1.315 | 0.993 | 0.571 | 0.0E+00  | 0.0E+00  | Hist1h2ae    | 1.473 | 0.600 | 0.599 | 3.2E-09  | 4.8E-06  |
| Gpx1          | 1.307 | 1.000 | 0.828 | 0.0E+00  | 0.0E+00  | Hist1h1b     | 2.008 | 0.556 | 0.500 | 1.6E-06  | 2.4E-03  |
| Prdx1         | 1.306 | 0.998 | 0.653 | 0.0E+00  | 0.0E+00  | Car2         | 1.424 | 0.451 | 0.501 | 5.3E-05  | 7.9E-02  |
| Selenop       | 1.301 | 0.939 | 0.505 | 0.0E+00  | 0.0E+00  | Smc2         | 1.419 | 0.545 | 0.391 | 1.3E-04  | 2.0E-01  |
| Ccl6          | 1.287 | 0.993 | 0.618 | 0.0E+00  | 0.0E+00  | Jchain       | 1.375 | 0.566 | 0.380 | 9.6E-04  | 1.0E+00  |
| Itgb5         | 1.270 | 0.995 | 0.664 | 0.0E+00  | 0.0E+00  | <b>Neu-5</b> |       |       |       |          |          |
| Snx5          | 1.244 | 0.989 | 0.529 | 0.0E+00  | 0.0E+00  | <b>IFN</b>   |       |       |       |          |          |
| Gusb          | 1.240 | 0.981 | 0.609 | 0.0E+00  | 0.0E+00  | Rsad2        | 3.882 | 0.893 | 0.683 | 2.2E-159 | 3.2E-156 |
| Aprt          | 1.235 | 0.992 | 0.727 | 0.0E+00  | 0.0E+00  | lsg15        | 2.862 | 0.914 | 0.683 | 9.1E-136 | 1.4E-132 |
| Dbi           | 1.213 | 0.986 | 0.631 | 0.0E+00  | 0.0E+00  | lfitm3       | 2.426 | 0.937 | 0.699 | 9.8E-131 | 1.5E-127 |
| Rps2          | 1.206 | 0.998 | 0.889 | 0.0E+00  | 0.0E+00  | Gbp2         | 3.508 | 0.883 | 0.647 | 3.1E-123 | 4.6E-120 |
| Cst3          | 1.200 | 0.999 | 0.812 | 0.0E+00  | 0.0E+00  | Slfn4        | 3.032 | 0.848 | 0.564 | 3.0E-118 | 4.5E-115 |
| Atp5g1        | 1.188 | 0.996 | 0.631 | 0.0E+00  | 0.0E+00  | lfi47        | 2.533 | 0.858 | 0.647 | 4.5E-108 | 6.7E-105 |
| Plekho1       | 1.164 | 0.955 | 0.538 | 0.0E+00  | 0.0E+00  | lfit2        | 1.494 | 0.827 | 0.689 | 1.6E-98  | 2.5E-95  |
| Myof          | 1.160 | 0.994 | 0.484 | 0.0E+00  | 0.0E+00  | Rtp4         | 2.650 | 0.820 | 0.679 | 1.4E-96  | 2.1E-93  |
| Abca1         | 1.158 | 0.989 | 0.723 | 0.0E+00  | 0.0E+00  | lfit1bl2     | 1.106 | 0.794 | 0.562 | 1.8E-92  | 2.6E-89  |
| Mpeg1         | 1.121 | 0.999 | 0.603 | 0.0E+00  | 0.0E+00  | Slfn5        | 2.500 | 0.787 | 0.570 | 5.6E-89  | 8.5E-86  |
| Creg1         | 1.120 | 0.999 | 0.654 | 0.0E+00  | 0.0E+00  | lfit3b       | 2.020 | 0.698 | 0.421 | 5.4E-66  | 8.2E-63  |
| Irf8          | 1.119 | 0.934 | 0.623 | 0.0E+00  | 0.0E+00  | Ccl4         | 1.652 | 0.921 | 0.717 | 1.5E-61  | 2.2E-58  |
| Cd93          | 1.117 | 0.916 | 0.618 | 0.0E+00  | 0.0E+00  | Acod1        | 1.515 | 0.764 | 0.419 | 5.1E-59  | 7.7E-56  |
| Lamtor4       | 1.117 | 0.985 | 0.692 | 0.0E+00  | 0.0E+00  | lfit1        | 2.933 | 0.693 | 0.445 | 1.8E-55  | 2.7E-52  |
| Pdia6         | 1.103 | 0.993 | 0.775 | 0.0E+00  | 0.0E+00  | lsg20        | 2.176 | 0.731 | 0.572 | 2.0E-51  | 3.0E-48  |
| Fam20c        | 1.100 | 0.997 | 0.755 | 0.0E+00  | 0.0E+00  | Cldn1        | 0.347 | 0.777 | 0.616 | 3.0E-47  | 4.4E-44  |
| Hebp1         | 1.091 | 0.971 | 0.633 | 0.0E+00  | 0.0E+00  | Fcgr4        | 1.090 | 0.812 | 0.694 | 1.6E-45  | 2.3E-42  |
| Hspe1         | 1.089 | 0.996 | 0.660 | 0.0E+00  | 0.0E+00  | Zbp1         | 1.271 | 0.789 | 0.633 | 5.8E-45  | 8.7E-42  |
| Fam96a        | 1.086 | 0.958 | 0.547 | 0.0E+00  | 0.0E+00  | Cmpk2        | 1.335 | 0.647 | 0.457 | 6.9E-42  | 1.0E-38  |
| Tubb5         | 1.084 | 0.991 | 0.582 | 0.0E+00  | 0.0E+00  | Wfdc17       | 0.879 | 0.916 | 0.778 | 1.7E-38  | 2.6E-35  |
| Sash1         | 1.076 | 0.988 | 0.700 | 0.0E+00  | 0.0E+00  | Oas1         | 2.003 | 0.668 | 0.582 | 1.0E-34  | 1.5E-31  |
| Msr1          | 1.069 | 0.965 | 0.286 | 0.0E+00  | 0.0E+00  | Hcar2        | 0.498 | 0.830 | 0.679 | 1.6E-30  | 2.4E-27  |
| Nme1          | 1.065 | 0.992 | 0.702 | 0.0E+00  | 0.0E+00  | Gbp5         | 1.549 | 0.660 | 0.546 | 6.0E-30  | 9.0E-27  |
| Fkbp2         | 1.048 | 0.993 | 0.516 | 0.0E+00  | 0.0E+00  | lfit3        | 2.987 | 0.612 | 0.399 | 9.5E-30  | 1.4E-26  |
| Tmem160       | 1.046 | 0.970 | 0.564 | 0.0E+00  | 0.0E+00  | Gm4316       | 0.371 | 0.279 | 0.493 | 1.4E-29  | 2.1E-26  |
| Gyg           | 1.041 | 0.960 | 0.639 | 0.0E+00  | 0.0E+00  | Gm12840      | 0.275 | 0.201 | 0.399 | 4.9E-28  | 7.3E-25  |
| Gatm          | 1.037 | 0.904 | 0.510 | 0.0E+00  | 0.0E+00  | Retnlg       | 0.406 | 0.835 | 0.628 | 9.9E-28  | 1.5E-24  |
| Anxa4         | 1.008 | 0.987 | 0.484 | 0.0E+00  | 0.0E+00  | G0s2         | 1.012 | 0.711 | 0.497 | 7.3E-27  | 1.1E-23  |
| Pgls          | 1.005 | 0.988 | 0.619 | 0.0E+00  | 0.0E+00  | Fyb          | 0.799 | 0.835 | 0.695 | 1.1E-26  | 1.6E-23  |
| Pid1          | 1.002 | 0.863 | 0.576 | 0.0E+00  | 0.0E+00  | Ffar2        | 0.272 | 0.701 | 0.484 | 2.4E-26  | 3.6E-23  |
| Ppp1r14b      | 1.000 | 0.991 | 0.648 | 0.0E+00  | 0.0E+00  | Cd274        | 1.280 | 0.736 | 0.593 | 5.4E-26  | 8.2E-23  |
| Ucp2          | 0.994 | 0.999 | 0.719 | 0.0E+00  | 0.0E+00  | Bst2         | 1.457 | 0.657 | 0.508 | 1.2E-23  | 1.7E-20  |
| Aldh2         | 0.986 | 0.970 | 0.496 | 0.0E+00  | 0.0E+00  | Egr1         | 0.572 | 0.756 | 0.554 | 1.1E-22  | 1.7E-19  |
| Tuba1b        | 0.983 | 0.991 | 0.583 | 0.0E+00  | 0.0E+00  | Ccl3         | 0.827 | 0.799 | 0.641 | 1.1E-22  | 1.7E-19  |
| Timp2         | 0.980 | 0.994 | 0.767 | 0.0E+00  | 0.0E+00  | Cxcl2        | 1.001 | 0.741 | 0.536 | 4.1E-22  | 6.2E-19  |
| Tmed3         | 0.973 | 0.994 | 0.602 | 0.0E+00  | 0.0E+00  | Cxcl10       | 1.921 | 0.551 | 0.311 | 1.4E-21  | 2.2E-18  |
| Zeb2          | 0.969 | 0.991 | 0.611 | 0.0E+00  | 0.0E+00  | ler3         | 0.726 | 0.820 | 0.788 | 1.7E-21  | 2.5E-18  |
| Sgk1          | 0.967 | 0.986 | 0.632 | 0.0E+00  | 0.0E+00  | Gm20234      | 0.309 | 0.609 | 0.491 | 1.1E-18  | 1.6E-15  |
| Lat2          | 0.960 | 0.968 | 0.664 | 0.0E+00  | 0.0E+00  | Ly6i         | 0.652 | 0.586 | 0.455 | 1.5E-18  | 2.2E-15  |
| Hai           | 0.960 | 0.984 | 0.673 | 0.0E+00  | 0.0E+00  | Usp18        | 1.392 | 0.604 | 0.553 | 2.2E-18  | 3.4E-15  |
| Ccr2          | 0.957 | 0.715 | 0.248 | 2.0E-241 | 3.0E-238 | Clec4a3      | 0.263 | 0.614 | 0.448 | 7.7E-17  | 1.1E-13  |
| Ccl2          | 1.048 | 0.587 | 0.454 | 4.3E-39  | 6.5E-36  | Slpi         | 0.712 | 0.797 | 0.643 | 1.8E-16  | 2.6E-13  |
| <b>Macs 2</b> |       |       |       |          |          | Gm5483       | 0.695 | 0.728 | 0.616 | 2.9E-16  | 4.3E-13  |
| Chil3         | 4.719 | 0.975 | 0.671 | 0.0E+00  | 0.0E+00  | Olfm4        | 0.430 | 0.635 | 0.476 | 1.4E-15  | 2.1E-12  |
| GpnmB         | 3.826 | 1.000 | 0.645 | 0.0E+00  | 0.0E+00  | Saa3         | 0.296 | 0.764 | 0.624 | 1.7E-15  | 2.6E-12  |
| Lpl           | 3.697 | 0.989 | 0.496 | 0.0E+00  | 0.0E+00  | Asprv1       | 0.545 | 0.734 | 0.588 | 2.1E-15  | 3.1E-12  |
| Ctsk          | 3.692 | 0.959 | 0.550 | 0.0E+00  | 0.0E+00  | Gm19951      | 0.676 | 0.769 | 0.685 | 5.5E-15  | 8.3E-12  |
| Mmp12         | 3.321 | 0.870 | 0.537 | 0.0E+00  | 0.0E+00  | lfi202b      | 0.285 | 0.739 | 0.658 | 5.6E-15  | 8.4E-12  |
| Lyz2          | 3.173 | 1.000 | 0.752 | 0.0E+00  | 0.0E+00  | lfitm1       | 0.593 | 0.807 | 0.738 | 8.3E-15  | 1.2E-11  |
| Psap          | 3.172 | 1.000 | 0.749 | 0.0E+00  | 0.0E+00  | Osgin1       | 0.663 | 0.678 | 0.588 | 7.4E-14  | 1.1E-10  |
| Cybb          | 2.910 | 1.000 | 0.504 | 0.0E+00  | 0.0E+00  | Fgd4         | 0.355 | 0.713 | 0.634 | 7.6E-14  | 1.1E-10  |
| Crip1         | 2.846 | 0.996 | 0.490 | 0.0E+00  | 0.0E+00  | Lcn2         | 0.607 | 0.683 | 0.610 | 1.0E-11  | 1.5E-08  |
| Atp6v0d2      | 2.784 | 0.999 | 0.677 | 0.0E+00  | 0.0E+00  | Cst3         | 0.478 | 0.858 | 0.821 | 2.9E-11  | 4.3E-08  |
| Spp1          | 2.744 | 0.996 | 0.782 | 0.0E+00  | 0.0E+00  | Fam20c       | 0.267 | 0.858 | 0.766 | 2.1E-10  | 3.2E-07  |
| Mfge8         | 2.720 | 0.895 | 0.672 | 0.0E+00  | 0.0E+00  | Bcl2a1a      | 0.523 | 0.398 | 0.556 | 5.1E-10  | 7.6E-07  |
| Ctss          | 2.600 | 0.999 | 0.649 | 0.0E+00  | 0.0E+00  | ld2          | 0.498 | 0.881 | 0.780 | 1.8E-09  | 2.6E-06  |
| Fabp5         | 2.562 | 0.999 | 0.797 | 0.0E+00  | 0.0E+00  | Wfdc21       | 0.437 | 0.713 | 0.653 | 1.8E-09  | 2.6E-06  |
| Ctsl          | 2.553 | 0.996 | 0.841 | 0.0E+00  | 0.0E+00  | lfi19        | 0.718 | 0.632 | 0.560 | 2.7E-09  | 4.0E-06  |
| Ctsd          | 2.452 | 1.000 | 0.964 | 0.0E+00  | 0.0E+00  | Laptm5       | 0.349 | 0.812 | 0.739 | 3.7E-08  | 5.6E-05  |
|               |       |       |       |          |          | ld1          | 0.788 | 0.688 | 0.693 | 5.4E-08  | 8.1E-05  |

|          |       |       |       |         |         |                      |       |       |       |          |          |
|----------|-------|-------|-------|---------|---------|----------------------|-------|-------|-------|----------|----------|
| Fabp4    | 2.405 | 0.976 | 0.611 | 0.0E+00 | 0.0E+00 | Csf2rb               | 0.657 | 0.721 | 0.686 | 8.4E-08  | 1.3E-04  |
| Lipa     | 2.389 | 0.997 | 0.513 | 0.0E+00 | 0.0E+00 | Bcl2a1b              | 0.643 | 0.751 | 0.631 | 3.8E-07  | 5.7E-04  |
| Mgll     | 2.382 | 0.973 | 0.587 | 0.0E+00 | 0.0E+00 | Ddx60                | 1.401 | 0.528 | 0.488 | 5.3E-07  | 8.0E-04  |
| Trem2    | 2.379 | 0.995 | 0.566 | 0.0E+00 | 0.0E+00 | Mpeg1                | 0.362 | 0.726 | 0.622 | 1.2E-06  | 1.7E-03  |
| Mpeg1    | 2.367 | 0.999 | 0.606 | 0.0E+00 | 0.0E+00 | Tnfrsf23             | 0.333 | 0.741 | 0.702 | 5.0E-06  | 7.5E-03  |
| Vim      | 2.330 | 0.999 | 0.634 | 0.0E+00 | 0.0E+00 | Osm                  | 0.260 | 0.475 | 0.334 | 5.3E-06  | 8.0E-03  |
| Sgk1     | 2.323 | 0.999 | 0.634 | 0.0E+00 | 0.0E+00 | Ifi2712a             | 2.007 | 0.553 | 0.533 | 5.5E-06  | 8.2E-03  |
| mt-Nd1   | 2.303 | 0.998 | 0.660 | 0.0E+00 | 0.0E+00 | Cdc42ep3             | 0.290 | 0.622 | 0.527 | 7.5E-06  | 1.1E-02  |
| S100a1   | 2.291 | 0.994 | 0.634 | 0.0E+00 | 0.0E+00 | Il18bp               | 0.429 | 0.508 | 0.450 | 1.3E-05  | 2.0E-02  |
| Ccl6     | 2.274 | 0.994 | 0.621 | 0.0E+00 | 0.0E+00 | Irf7                 | 0.399 | 0.642 | 0.654 | 2.9E-05  | 4.4E-02  |
| Abcg1    | 2.256 | 0.997 | 0.645 | 0.0E+00 | 0.0E+00 | Lrg1                 | 0.382 | 0.668 | 0.699 | 2.1E-04  | 3.1E-01  |
| Mrc1     | 2.227 | 0.894 | 0.408 | 0.0E+00 | 0.0E+00 | Cd300c2              | 0.587 | 0.657 | 0.660 | 2.3E-04  | 3.4E-01  |
| Myof     | 2.219 | 0.995 | 0.488 | 0.0E+00 | 0.0E+00 | Hk2                  | 0.508 | 0.497 | 0.587 | 2.8E-04  | 4.2E-01  |
| Selenop  | 2.137 | 0.991 | 0.506 | 0.0E+00 | 0.0E+00 | Steap4               | 0.298 | 0.586 | 0.487 | 3.4E-04  | 5.1E-01  |
| Pld3     | 2.132 | 0.995 | 0.574 | 0.0E+00 | 0.0E+00 | Ifi209               | 0.898 | 0.563 | 0.599 | 4.8E-04  | 7.3E-01  |
| Plin2    | 2.121 | 0.999 | 0.844 | 0.0E+00 | 0.0E+00 | Ly6c2                | 1.077 | 0.482 | 0.398 | 5.2E-04  | 7.8E-01  |
| Apoe     | 2.006 | 0.979 | 0.778 | 0.0E+00 | 0.0E+00 | Chil1                | 0.308 | 0.429 | 0.495 | 7.0E-04  | 1.0E+00  |
| Anxa5    | 1.983 | 0.999 | 0.671 | 0.0E+00 | 0.0E+00 | Il18                 | 0.297 | 0.556 | 0.516 | 8.5E-04  | 1.0E+00  |
| Cd68     | 1.963 | 0.998 | 0.702 | 0.0E+00 | 0.0E+00 | Ly6g                 | 0.309 | 0.497 | 0.449 | 1.5E-03  | 1.0E+00  |
| Aig1     | 1.926 | 0.981 | 0.665 | 0.0E+00 | 0.0E+00 | Rgs1                 | 0.948 | 0.627 | 0.632 | 1.9E-03  | 1.0E+00  |
| Mgst1    | 1.906 | 0.996 | 0.592 | 0.0E+00 | 0.0E+00 | Unc93b1              | 0.563 | 0.569 | 0.521 | 2.0E-03  | 1.0E+00  |
| Slc7a2   | 1.859 | 0.953 | 0.593 | 0.0E+00 | 0.0E+00 | Hist1h1c             | 0.327 | 0.497 | 0.617 | 2.6E-03  | 1.0E+00  |
| Ear2     | 1.849 | 0.881 | 0.305 | 0.0E+00 | 0.0E+00 | Ifitm6               | 0.346 | 0.391 | 0.472 | 4.6E-03  | 1.0E+00  |
| Sh3bgrl  | 1.816 | 0.991 | 0.540 | 0.0E+00 | 0.0E+00 | <b>Eryth.</b> Hbb-bs | 9.669 | 1.000 | 0.782 | 0.0E+00  | 0.0E+00  |
| Lrp1     | 1.810 | 0.995 | 0.507 | 0.0E+00 | 0.0E+00 | Hba-a1               | 8.916 | 1.000 | 0.499 | 0.0E+00  | 0.0E+00  |
| Hexa     | 1.807 | 0.999 | 0.690 | 0.0E+00 | 0.0E+00 | Hbb-bt               | 8.788 | 0.996 | 0.481 | 0.0E+00  | 0.0E+00  |
| Gns      | 1.748 | 1.000 | 0.684 | 0.0E+00 | 0.0E+00 | Hba-a2               | 8.609 | 1.000 | 0.450 | 0.0E+00  | 0.0E+00  |
| Abhd12   | 1.739 | 0.990 | 0.418 | 0.0E+00 | 0.0E+00 | Bpgm                 | 4.001 | 0.837 | 0.481 | 0.0E+00  | 0.0E+00  |
| Ahnak2   | 1.738 | 0.981 | 0.542 | 0.0E+00 | 0.0E+00 | Alas2                | 3.365 | 0.939 | 0.531 | 0.0E+00  | 0.0E+00  |
| Creg1    | 1.723 | 0.999 | 0.657 | 0.0E+00 | 0.0E+00 | Snca                 | 2.876 | 0.949 | 0.366 | 0.0E+00  | 0.0E+00  |
| Prdx1    | 1.712 | 0.996 | 0.656 | 0.0E+00 | 0.0E+00 | Fech                 | 2.293 | 0.957 | 0.604 | 0.0E+00  | 0.0E+00  |
| Lgals1   | 1.693 | 0.991 | 0.563 | 0.0E+00 | 0.0E+00 | Fam46c               | 1.861 | 0.916 | 0.610 | 0.0E+00  | 0.0E+00  |
| Lgmn     | 1.687 | 0.991 | 0.618 | 0.0E+00 | 0.0E+00 | Rsad2                | 1.161 | 0.865 | 0.679 | 0.0E+00  | 0.0E+00  |
| Gstm1    | 1.679 | 0.977 | 0.546 | 0.0E+00 | 0.0E+00 | Gypa                 | 0.702 | 0.791 | 0.028 | 0.0E+00  | 0.0E+00  |
| Trf      | 1.674 | 0.974 | 0.490 | 0.0E+00 | 0.0E+00 | Slc4a1               | 0.430 | 0.640 | 0.027 | 0.0E+00  | 0.0E+00  |
| Gm26917  | 1.673 | 0.905 | 0.556 | 0.0E+00 | 0.0E+00 | Prdx2                | 1.533 | 0.891 | 0.636 | 2.0E-288 | 3.0E-285 |
| Gusb     | 1.658 | 0.988 | 0.611 | 0.0E+00 | 0.0E+00 | Fam213a              | 0.874 | 0.916 | 0.568 | 2.3E-282 | 3.5E-279 |
| Lamp1    | 1.650 | 0.999 | 0.858 | 0.0E+00 | 0.0E+00 | Isg20                | 1.050 | 0.910 | 0.561 | 2.0E-245 | 2.9E-242 |
| Acp5     | 1.634 | 0.995 | 0.601 | 0.0E+00 | 0.0E+00 | Ncoa4                | 0.766 | 0.907 | 0.558 | 3.4E-228 | 5.0E-225 |
| Vat1     | 1.632 | 0.981 | 0.642 | 0.0E+00 | 0.0E+00 | Aldh1a1              | 0.377 | 0.748 | 0.376 | 5.6E-212 | 8.4E-209 |
| F7       | 1.632 | 0.925 | 0.406 | 0.0E+00 | 0.0E+00 | Car2                 | 0.406 | 0.781 | 0.489 | 6.8E-212 | 1.0E-208 |
| Axl      | 1.612 | 0.892 | 0.422 | 0.0E+00 | 0.0E+00 | Ube2c                | 0.553 | 0.642 | 0.419 | 4.5E-87  | 6.8E-84  |
| Ctsb     | 1.608 | 1.000 | 0.943 | 0.0E+00 | 0.0E+00 | Gpx1                 | 0.918 | 0.898 | 0.834 | 2.7E-17  | 4.0E-14  |
| Ctsz     | 1.605 | 1.000 | 0.787 | 0.0E+00 | 0.0E+00 | <b>Macs 3</b> Lyz2   | 3.103 | 0.994 | 0.755 | 0.0E+00  | 0.0E+00  |
| Snx5     | 1.602 | 0.992 | 0.532 | 0.0E+00 | 0.0E+00 | Atp6v0d2             | 2.835 | 0.929 | 0.683 | 0.0E+00  | 0.0E+00  |
| Ctsa     | 1.599 | 0.999 | 0.692 | 0.0E+00 | 0.0E+00 | Fabp5                | 2.818 | 0.976 | 0.801 | 0.0E+00  | 0.0E+00  |
| Dusp3    | 1.564 | 0.986 | 0.628 | 0.0E+00 | 0.0E+00 | Fabp4                | 2.446 | 0.907 | 0.618 | 0.0E+00  | 0.0E+00  |
| Cd36     | 1.561 | 0.877 | 0.480 | 0.0E+00 | 0.0E+00 | Trem2                | 2.287 | 0.948 | 0.573 | 0.0E+00  | 0.0E+00  |
| Myo5a    | 1.560 | 0.983 | 0.491 | 0.0E+00 | 0.0E+00 | Mmp12                | 2.260 | 0.889 | 0.540 | 0.0E+00  | 0.0E+00  |
| Aplp2    | 1.550 | 0.995 | 0.630 | 0.0E+00 | 0.0E+00 | Vim                  | 2.236 | 0.943 | 0.640 | 0.0E+00  | 0.0E+00  |
| Il11ra1  | 1.532 | 0.958 | 0.470 | 0.0E+00 | 0.0E+00 | Gpnmb                | 2.203 | 0.955 | 0.651 | 0.0E+00  | 0.0E+00  |
| Kcnq1ot1 | 1.510 | 0.945 | 0.642 | 0.0E+00 | 0.0E+00 | Ftl1                 | 1.976 | 1.000 | 0.956 | 0.0E+00  | 0.0E+00  |
| Sirpa    | 1.506 | 0.996 | 0.609 | 0.0E+00 | 0.0E+00 | C1qa                 | 1.299 | 0.907 | 0.583 | 0.0E+00  | 0.0E+00  |
| Ilgax    | 1.499 | 0.986 | 0.527 | 0.0E+00 | 0.0E+00 | Il11ra1              | 1.068 | 0.868 | 0.479 | 1.4E-302 | 2.1E-299 |
| Anxa4    | 1.494 | 0.988 | 0.487 | 0.0E+00 | 0.0E+00 | Lgals1               | 2.459 | 0.899 | 0.571 | 2.8E-293 | 4.2E-290 |
| Fstl1    | 1.486 | 0.862 | 0.466 | 0.0E+00 | 0.0E+00 | C1qb                 | 1.319 | 0.890 | 0.505 | 4.2E-288 | 6.2E-285 |
| Dnmt3a   | 1.473 | 0.946 | 0.462 | 0.0E+00 | 0.0E+00 | Lpl                  | 2.532 | 0.875 | 0.506 | 1.6E-278 | 2.4E-275 |
| Cdo1     | 1.466 | 0.918 | 0.461 | 0.0E+00 | 0.0E+00 | Cdkn2a               | 0.952 | 0.852 | 0.657 | 1.9E-278 | 2.9E-275 |
| Shtn1    | 1.463 | 0.978 | 0.464 | 0.0E+00 | 0.0E+00 | Pld3                 | 1.832 | 0.903 | 0.582 | 6.5E-275 | 9.7E-272 |
| Laptn5   | 1.462 | 0.999 | 0.728 | 0.0E+00 | 0.0E+00 | Crip1                | 2.187 | 0.866 | 0.500 | 1.9E-269 | 2.8E-266 |
| Grn      | 1.460 | 0.996 | 0.841 | 0.0E+00 | 0.0E+00 | Serpnb6a             | 2.298 | 0.917 | 0.672 | 1.5E-268 | 2.3E-265 |
| Mertk    | 1.458 | 0.955 | 0.387 | 0.0E+00 | 0.0E+00 | Spp1                 | 2.531 | 0.948 | 0.786 | 4.3E-264 | 6.4E-261 |
| Slc6a6   | 1.456 | 0.997 | 0.490 | 0.0E+00 | 0.0E+00 | Prdx1                | 2.470 | 0.877 | 0.664 | 4.4E-258 | 6.7E-255 |
| Smpd3a   | 1.454 | 0.996 | 0.614 | 0.0E+00 | 0.0E+00 | Sdc3                 | 1.041 | 0.862 | 0.567 | 9.7E-254 | 1.5E-250 |
| Il18     | 1.438 | 0.916 | 0.498 | 0.0E+00 | 0.0E+00 | S100a1               | 2.732 | 0.862 | 0.643 | 1.9E-248 | 2.8E-245 |
| Abcc5    | 1.434 | 0.946 | 0.408 | 0.0E+00 | 0.0E+00 | Myof                 | 1.428 | 0.860 | 0.499 | 6.7E-247 | 1.0E-243 |
| Colgalt1 | 1.434 | 0.980 | 0.501 | 0.0E+00 | 0.0E+00 | Ctsk                 | 2.393 | 0.836 | 0.559 | 2.3E-238 | 3.5E-235 |

|                      |              |       |       |          |          |          |         |          |       |       |         |          |          |
|----------------------|--------------|-------|-------|----------|----------|----------|---------|----------|-------|-------|---------|----------|----------|
|                      | Ucp2         | 1.423 | 0.999 | 0.721    | 0.0E+00  | 0.0E+00  |         | Mt2      | 1.490 | 0.817 | 0.645   | 2.6E-238 | 3.8E-235 |
|                      | Serpinb6a    | 1.419 | 0.997 | 0.665    | 0.0E+00  | 0.0E+00  |         | Ccl6     | 2.295 | 0.913 | 0.628   | 1.9E-236 | 2.9E-233 |
|                      | Itgb2        | 1.419 | 0.996 | 0.577    | 0.0E+00  | 0.0E+00  |         | Cd63     | 2.069 | 0.968 | 0.778   | 4.8E-228 | 7.2E-225 |
|                      | Cd63         | 1.419 | 0.999 | 0.774    | 0.0E+00  | 0.0E+00  |         | Apoe     | 1.530 | 0.947 | 0.782   | 7.2E-227 | 1.1E-223 |
|                      | Dbi          | 1.415 | 0.987 | 0.634    | 0.0E+00  | 0.0E+00  |         | Chil3    | 2.328 | 0.881 | 0.677   | 1.7E-224 | 2.5E-221 |
|                      | Tgfb2        | 1.413 | 0.988 | 0.488    | 0.0E+00  | 0.0E+00  |         | C1qc     | 1.093 | 0.861 | 0.644   | 9.6E-215 | 1.4E-211 |
|                      | Sdc3         | 1.412 | 0.957 | 0.559    | 0.0E+00  | 0.0E+00  |         | Lgmn     | 1.340 | 0.917 | 0.625   | 6.9E-209 | 1.0E-205 |
|                      | Npc2         | 1.410 | 1.000 | 0.886    | 0.0E+00  | 0.0E+00  |         | Plin2    | 1.944 | 0.957 | 0.847   | 9.8E-201 | 1.5E-197 |
|                      | Dhrs3        | 1.394 | 0.995 | 0.661    | 0.0E+00  | 0.0E+00  |         | Mfge8    | 2.225 | 0.887 | 0.675   | 2.6E-200 | 3.9E-197 |
|                      | Serpine1     | 1.356 | 0.860 | 0.281    | 0.0E+00  | 0.0E+00  |         | Gngt2    | 2.023 | 0.880 | 0.639   | 1.5E-198 | 2.2E-195 |
|                      | Syng1        | 1.354 | 0.971 | 0.762    | 0.0E+00  | 0.0E+00  |         | Cd36     | 1.210 | 0.816 | 0.487   | 1.8E-196 | 2.6E-193 |
|                      | Atp13a2      | 1.353 | 0.978 | 0.468    | 0.0E+00  | 0.0E+00  |         | Bhlhe41  | 1.075 | 0.805 | 0.561   | 8.0E-189 | 1.2E-185 |
|                      | Tcf7l2       | 1.342 | 0.915 | 0.455    | 0.0E+00  | 0.0E+00  |         | Syng1    | 1.161 | 0.875 | 0.768   | 9.8E-184 | 1.5E-180 |
|                      | Sort1        | 1.301 | 0.946 | 0.559    | 0.0E+00  | 0.0E+00  |         | Mt1      | 2.231 | 0.865 | 0.772   | 4.2E-183 | 6.3E-180 |
|                      | Lrpap1       | 1.294 | 0.948 | 0.577    | 0.0E+00  | 0.0E+00  |         | Psap     | 1.901 | 0.939 | 0.754   | 5.8E-181 | 8.4E-178 |
|                      | Bhlhe41      | 1.284 | 0.943 | 0.552    | 0.0E+00  | 0.0E+00  |         | Comt     | 1.663 | 0.818 | 0.624   | 8.2E-180 | 1.2E-176 |
|                      | AU020206     | 1.254 | 0.941 | 0.692    | 0.0E+00  | 0.0E+00  |         | Ucp2     | 1.750 | 0.878 | 0.729   | 1.1E-168 | 1.6E-165 |
| <b>Neu-4 classic</b> | Retnlg       | 4.320 | 0.993 | 0.616    | 0.0E+00  | 0.0E+00  |         | Ctsz     | 1.495 | 0.959 | 0.791   | 1.0E-166 | 1.5E-163 |
|                      | lfitm6       | 3.584 | 0.992 | 0.450    | 0.0E+00  | 0.0E+00  |         | Vat1     | 1.214 | 0.850 | 0.651   | 4.9E-166 | 7.4E-163 |
|                      | Lcn2         | 3.566 | 0.999 | 0.596    | 0.0E+00  | 0.0E+00  |         | Ctss     | 1.571 | 0.856 | 0.658   | 2.9E-164 | 4.3E-161 |
|                      | Wfdc21       | 3.439 | 0.999 | 0.640    | 0.0E+00  | 0.0E+00  |         | Rps2     | 1.322 | 0.923 | 0.894   | 6.8E-152 | 1.0E-148 |
|                      | Mmp8         | 2.882 | 0.971 | 0.602    | 0.0E+00  | 0.0E+00  |         | Mgll     | 1.555 | 0.775 | 0.599   | 2.6E-149 | 3.9E-146 |
|                      | Wfdc17       | 2.808 | 0.997 | 0.771    | 0.0E+00  | 0.0E+00  |         | Lipa     | 1.354 | 0.858 | 0.524   | 4.6E-147 | 6.9E-144 |
|                      | lfitm1       | 2.636 | 0.992 | 0.728    | 0.0E+00  | 0.0E+00  |         | Nme1     | 1.536 | 0.864 | 0.712   | 2.6E-139 | 3.8E-136 |
|                      | Lrg1         | 2.580 | 0.992 | 0.687    | 0.0E+00  | 0.0E+00  |         | Npc2     | 1.668 | 0.952 | 0.889   | 1.9E-138 | 2.9E-135 |
|                      | Prok2        | 2.540 | 0.960 | 0.568    | 0.0E+00  | 0.0E+00  |         | Cd68     | 1.715 | 0.860 | 0.710   | 4.7E-137 | 7.0E-134 |
|                      | Ly6g         | 2.372 | 0.944 | 0.430    | 0.0E+00  | 0.0E+00  |         | Ndufc2   | 1.120 | 0.806 | 0.620   | 1.0E-130 | 1.6E-127 |
|                      | Slpi         | 1.882 | 0.978 | 0.632    | 0.0E+00  | 0.0E+00  |         | Ctsd     | 1.460 | 0.982 | 0.965   | 5.3E-126 | 8.0E-123 |
|                      | lfitm3       | 1.752 | 0.989 | 0.691    | 0.0E+00  | 0.0E+00  |         | Chchd10  | 0.992 | 0.770 | 0.640   | 1.8E-116 | 2.7E-113 |
|                      | Stfa2        | 1.639 | 0.909 | 0.508    | 0.0E+00  | 0.0E+00  |         | Acp5     | 1.333 | 0.859 | 0.610   | 1.3E-111 | 2.0E-108 |
|                      | Cd177        | 1.499 | 0.907 | 0.482    | 0.0E+00  | 0.0E+00  |         | Blvra    | 1.204 | 0.765 | 0.688   | 3.1E-107 | 4.6E-104 |
|                      | Chil1        | 1.440 | 0.942 | 0.477    | 0.0E+00  | 0.0E+00  |         | Ckb      | 1.006 | 0.730 | 0.512   | 4.7E-105 | 7.1E-102 |
|                      | Anxa1        | 1.274 | 0.997 | 0.792    | 0.0E+00  | 0.0E+00  |         | Lrpap1   | 1.029 | 0.784 | 0.587   | 1.6E-100 | 2.4E-97  |
|                      | Steap4       | 1.122 | 0.940 | 0.470    | 0.0E+00  | 0.0E+00  |         | Marco    | 1.092 | 0.638 | 0.382   | 1.4E-99  | 2.1E-96  |
|                      | Ggt1         | 1.101 | 0.897 | 0.480    | 0.0E+00  | 0.0E+00  |         | Hebp1    | 1.673 | 0.752 | 0.647   | 4.2E-98  | 6.3E-95  |
|                      | Il1f9        | 0.835 | 0.940 | 0.545    | 3.3E-294 | 4.9E-291 |         | Mrc1     | 1.060 | 0.678 | 0.421   | 4.6E-96  | 6.8E-93  |
|                      | Silfn4       | 0.805 | 0.912 | 0.554    | 3.6E-286 | 5.4E-283 |         | Creg1    | 1.335 | 0.866 | 0.665   | 2.1E-95  | 3.1E-92  |
|                      | Tgm1         | 0.511 | 0.865 | 0.592    | 3.6E-260 | 5.4E-257 |         | Mpeg1    | 1.104 | 0.872 | 0.615   | 1.0E-91  | 1.5E-88  |
|                      | Ngp          | 1.375 | 0.786 | 0.348    | 1.6E-249 | 2.3E-246 |         | Rpl3     | 1.021 | 0.848 | 0.712   | 2.1E-91  | 3.2E-88  |
|                      | Gm5483       | 1.224 | 0.916 | 0.606    | 2.1E-249 | 3.2E-246 |         | Ear2     | 1.521 | 0.627 | 0.320   | 7.5E-87  | 1.1E-83  |
|                      | Gbp2         | 0.381 | 0.899 | 0.640    | 3.9E-247 | 5.9E-244 |         | Gpx1     | 1.184 | 0.891 | 0.835   | 1.3E-82  | 2.0E-79  |
|                      | BC100530     | 2.269 | 0.877 | 0.550    | 4.7E-247 | 7.0E-244 |         | Ctsl     | 1.931 | 0.937 | 0.845   | 3.9E-82  | 5.8E-79  |
|                      | Tgfb1        | 0.991 | 0.922 | 0.598    | 1.6E-246 | 2.5E-243 |         | Anxa4    | 1.516 | 0.722 | 0.503   | 2.2E-78  | 3.2E-75  |
|                      | Flna         | 0.907 | 0.875 | 0.483    | 5.7E-215 | 8.5E-212 |         | Gyg      | 1.106 | 0.792 | 0.651   | 6.1E-76  | 9.1E-73  |
|                      | Csf2rb       | 0.767 | 0.972 | 0.676    | 1.4E-214 | 2.1E-211 |         | Akr1b3   | 1.361 | 0.704 | 0.519   | 2.5E-74  | 3.7E-71  |
|                      | Hacd4        | 1.020 | 0.822 | 0.508    | 3.9E-214 | 5.8E-211 |         | Abcg1    | 1.286 | 0.825 | 0.655   | 1.8E-73  | 2.7E-70  |
|                      | Ccl6         | 0.890 | 0.959 | 0.624    | 1.5E-213 | 2.3E-210 |         | Cybb     | 1.621 | 0.701 | 0.520   | 1.8E-71  | 2.7E-68  |
|                      | Gyg          | 0.741 | 0.863 | 0.647    | 1.3E-200 | 2.0E-197 |         | Anxa5    | 1.578 | 0.758 | 0.684   | 1.8E-70  | 2.7E-67  |
|                      | Stfa2l1      | 1.303 | 0.835 | 0.467    | 2.0E-193 | 2.9E-190 |         | Il18     | 1.245 | 0.662 | 0.512   | 9.3E-69  | 1.4E-65  |
|                      | Pi16         | 0.851 | 0.785 | 0.460    | 4.3E-188 | 6.4E-185 |         | Fit1-ps1 | 0.990 | 0.663 | 0.422   | 6.5E-67  | 9.7E-64  |
|                      | Tceal9       | 0.260 | 0.937 | 0.666    | 1.7E-185 | 2.6E-182 |         | Lamtor4  | 1.225 | 0.821 | 0.703   | 5.3E-66  | 7.9E-63  |
|                      | Id1          | 0.309 | 0.894 | 0.685    | 8.3E-174 | 1.2E-170 |         | Mgst1    | 1.663 | 0.691 | 0.607   | 2.6E-64  | 4.0E-61  |
|                      | Syne1        | 0.622 | 0.810 | 0.599    | 1.2E-162 | 1.8E-159 |         | Hexa     | 1.098 | 0.839 | 0.699   | 4.3E-62  | 6.4E-59  |
|                      | F630028O10Ri | 0.753 | 0.828 | 0.534    | 8.0E-158 | 1.2E-154 |         | Sh3bgrl  | 1.604 | 0.671 | 0.556   | 1.4E-58  | 2.1E-55  |
|                      | Mgst1        | 0.476 | 0.870 | 0.599    | 2.7E-148 | 4.1E-145 |         | Cndp2    | 1.101 | 0.673 | 0.547   | 2.4E-57  | 3.5E-54  |
|                      | Gadd45a      | 0.597 | 0.832 | 0.616    | 9.7E-141 | 1.5E-137 |         | Lmna     | 1.256 | 0.730 | 0.630   | 2.9E-50  | 4.4E-47  |
|                      | Tuba1a       | 0.562 | 0.780 | 0.518    | 2.4E-137 | 3.7E-134 |         | Gstm1    | 1.617 | 0.640 | 0.563   | 2.5E-49  | 3.7E-46  |
| Napsa                | 0.305        | 0.855 | 0.579 | 6.0E-121 | 9.0E-118 |          | Ptms    | 1.387    | 0.727 | 0.623 | 3.7E-49 | 5.5E-46  |          |
| Adam8                | 0.628        | 0.807 | 0.586 | 3.7E-118 | 5.5E-115 |          | Sept9   | 1.139    | 0.627 | 0.473 | 6.6E-45 | 9.8E-42  |          |
| Ly6c2                | 0.635        | 0.708 | 0.387 | 1.9E-116 | 2.9E-113 |          | Lamp1   | 0.986    | 0.887 | 0.863 | 7.9E-42 | 1.2E-38  |          |
| Arhgap25             | 0.285        | 0.808 | 0.494 | 8.0E-109 | 1.2E-105 |          | Nenf    | 0.948    | 0.658 | 0.522 | 8.2E-42 | 1.2E-38  |          |
| Fgd4                 | 0.382        | 0.790 | 0.629 | 7.6E-99  | 1.1E-95  |          | Selenop | 1.239    | 0.639 | 0.523 | 4.1E-40 | 6.2E-37  |          |
| Lmo4                 | 0.595        | 0.715 | 0.404 | 6.3E-96  | 9.5E-93  |          | Ctsb    | 1.179    | 0.945 | 0.945 | 9.1E-39 | 1.4E-35  |          |
| Smpd3a               | 0.448        | 0.826 | 0.623 | 7.2E-91  | 1.1E-87  |          | Dbi     | 1.285    | 0.650 | 0.649 | 5.4E-32 | 8.1E-29  |          |
| Itgb2                | 0.339        | 0.867 | 0.585 | 4.4E-86  | 6.6E-83  |          | Ccl9    | 1.120    | 0.623 | 0.545 | 1.0E-31 | 1.5E-28  |          |
| Acv11                | 0.628        | 0.673 | 0.488 | 1.1E-76  | 1.7E-73  |          | Ctsa    | 0.950    | 0.810 | 0.702 | 4.3E-31 | 6.5E-28  |          |
| Saa3                 | 0.352        | 0.854 | 0.617 | 1.3E-74  | 2.0E-71  |          | Camk1   | 1.023    | 0.632 | 0.532 | 6.6E-31 | 9.9E-28  |          |
| Sirpa                | 0.296        | 0.858 | 0.617 | 5.0E-72  | 7.5E-69  |          | Hspe1   | 1.301    | 0.691 | 0.676 | 9.4E-31 | 1.4E-27  |          |
| Olfm4                | 1.468        | 0.683 | 0.470 | 6.3E-67  | 9.5E-64  |          | Smpd3a  | 0.946    | 0.721 | 0.628 | 2.8E-25 | 4.3E-22  |          |
| Asprv1               | 0.875        | 0.706 | 0.585 | 2.1E-58  | 3.2E-55  |          | Pgls    | 1.000    | 0.682 | 0.636 | 5.1E-23 | 7.6E-20  |          |

|           |       |       |       |         |         |          |       |       |       |         |         |
|-----------|-------|-------|-------|---------|---------|----------|-------|-------|-------|---------|---------|
| Olfm4     | 1.468 | 0.683 | 0.470 | 6.3E-67 | 9.5E-64 | Smpd3a   | 0.946 | 0.721 | 0.628 | 2.8E-25 | 4.3E-22 |
| Asprv1    | 0.875 | 0.706 | 0.585 | 2.1E-58 | 3.2E-55 | Pgls     | 1.000 | 0.682 | 0.636 | 5.1E-23 | 7.6E-20 |
| Camp      | 0.968 | 0.597 | 0.362 | 2.9E-50 | 4.4E-47 | Atp5g1   | 1.239 | 0.649 | 0.649 | 5.3E-21 | 8.0E-18 |
| Serpinb1a | 0.640 | 0.616 | 0.536 | 9.8E-38 | 1.5E-34 | Trf      | 0.948 | 0.589 | 0.509 | 6.0E-18 | 9.0E-15 |
| Cfp       | 0.367 | 0.625 | 0.445 | 1.9E-37 | 2.9E-34 | Fam96a   | 0.940 | 0.409 | 0.573 | 6.5E-15 | 9.8E-12 |
| Sitfa3    | 0.514 | 0.382 | 0.548 | 5.2E-34 | 7.8E-31 | Ppp1r14b | 1.198 | 0.602 | 0.668 | 1.6E-10 | 2.4E-07 |
| Abcd2     | 0.264 | 0.621 | 0.524 | 2.9E-28 | 4.3E-25 | Rexo2    | 1.352 | 0.558 | 0.640 | 1.2E-09 | 1.8E-06 |
| Dgat2     | 0.299 | 0.683 | 0.628 | 9.4E-26 | 1.4E-22 | Aig1     | 1.010 | 0.561 | 0.683 | 5.7E-03 | 1.0E+00 |
| Rab27a    | 0.295 | 0.545 | 0.430 | 4.6E-11 | 6.8E-08 |          |       |       |       |         |         |
| Osm       | 0.446 | 0.514 | 0.328 | 4.6E-06 | 7.0E-03 |          |       |       |       |         |         |

**Supplemental Table 4: GSEA on scRNAseq Populations, related to Figure 6**  
**NES=Normalized Enrichment Score, FDR=False Discovery Rate**

| Group                      | MSigDB Signature Name                                                                                                                   | Combo vs aPD1                              |       |         |       |       |         |       |       |         |
|----------------------------|-----------------------------------------------------------------------------------------------------------------------------------------|--------------------------------------------|-------|---------|-------|-------|---------|-------|-------|---------|
|                            |                                                                                                                                         | Macs/Dend                                  |       |         | Neus  |       |         | Tumor |       |         |
|                            |                                                                                                                                         | NES                                        | FDR q | -Log(q) | NES   | FDR q | -Log(q) | NES   | FDR q | -Log(q) |
| DNA Replication and Damage | REACTOME_G1_S_DNA_DAMAGE_CHECKPOINTS.v2022.1.Hs.grp                                                                                     | 1.64                                       | 0.02  | 1.65    | 1.30  | 0.18  | 0.74    | 1.46  | 0.03  | 1.57    |
|                            | REACTOME_ORC1_REMOVAL_FROM_CHROMATIN.v2022.1.Hs.grp                                                                                     | 1.51                                       | 0.04  | 1.36    | 1.64  | 0.04  | 1.39    | 1.49  | 0.02  | 1.68    |
|                            | REACTOME_SWITCHING_OF_ORIGINS_TO_A_POST_REPLICATIVE_STATE.v2022.1.Hs.grp                                                                | 1.42                                       | 0.07  | 1.15    | 1.59  | 0.05  | 1.33    | 1.43  | 0.03  | 1.46    |
|                            | REACTOME_CDT1_ASSOCIATION_WITH_THE_CDC6_ORC_ORIGIN_COMPLEX.v2022.1.Hs.grp                                                               | 1.55                                       | 0.03  | 1.46    | 1.69  | 0.04  | 1.40    | 1.41  | 0.04  | 1.36    |
|                            | REACTOME_SYNTHESIS_OF_DNA.v2022.1.Hs.grp                                                                                                | 1.37                                       | 0.10  | 1.01    | 1.63  | 0.04  | 1.39    | 1.37  | 0.06  | 1.23    |
|                            | REACTOME_APC_C_MEDIATED_DEGRADATION_OF_CELL_CYCLE_PROTEINS.v2022.1.Hs.grp                                                               | 1.45                                       | 0.06  | 1.24    | 1.52  | 0.07  | 1.18    | 1.40  | 0.05  | 1.34    |
| Protein and RNA Processing | KEGG_RIBOSOME.v2022.1.Hs.grp                                                                                                            | 2.56                                       | 0.00  | 4.00    | 1.61  | 0.04  | 1.37    | -2.28 | 0.00  | 4.00    |
|                            | REACTOME_EUKARYOTIC_TRANSLATION_ELONGATION.v2022.1.Hs.grp                                                                               | 2.56                                       | 0.00  | 4.00    | 1.52  | 0.07  | 1.17    | -2.42 | 0.00  | 4.00    |
|                            | Hs.grp                                                                                                                                  | 2.54                                       | 0.00  | 4.00    | 1.64  | 0.04  | 1.39    | -2.02 | 0.00  | 2.85    |
|                            | REACTOME_RESPONSE_OF_EIF2AK4_GCN2_TO_AMINO_ACID_DEFICIENCY.v2022.1.Hs.grp                                                               | 2.41                                       | 0.00  | 4.00    | 1.36  | 0.14  | 0.84    | -2.12 | 0.00  | 3.34    |
|                            | REACTOME_EUKARYOTIC_TRANSLATION_INITIATION.v2022.1.Hs.grp                                                                               | 2.40                                       | 0.00  | 4.00    | 1.25  | 0.22  | 0.65    | -2.11 | 0.00  | 3.37    |
|                            | REACTOME_INFLUENZA_INFECTION.v2022.1.Hs.grp                                                                                             | 2.40                                       | 0.00  | 4.00    | 1.27  | 0.21  | 0.67    | -2.19 | 0.00  | 3.84    |
|                            | GOBP_CYTOPLASMIC_TRANSLATION.v2022.1.Hs.grp                                                                                             | 2.24                                       | 0.00  | 4.00    | 1.04  | 0.45  | 0.34    | -1.94 | 0.00  | 2.60    |
|                            | REACTOME_TRANSLATION.v2022.1.Hs.grp                                                                                                     | 2.01                                       | 0.00  | 3.05    | 1.23  | 0.24  | 0.61    | -1.62 | 0.02  | 1.69    |
|                            | REACTOME_SELENOAMINO_ACID_METABOLISM.v2022.1.Hs.grp                                                                                     | 2.38                                       | 0.00  | 4.00    | 1.51  | 0.07  | 1.17    | -2.38 | 0.00  | 4.00    |
|                            | REACTOME_CELLULAR_RESPONSE_TO_STARVATION.v2022.1.Hs.grp                                                                                 | 2.30                                       | 0.00  | 4.00    | 1.04  | 0.45  | 0.35    | -1.80 | 0.01  | 2.14    |
|                            | REACTOME_METABOLISM_OF_AMINO_ACIDS_AND_DERIVATIVES.v2022.1.Hs.grp                                                                       | 1.98                                       | 0.00  | 2.99    | 1.22  | 0.25  | 0.61    | -1.56 | 0.03  | 1.54    |
|                            | REACTOME_NONSENSE_MEDIATED_DECAY_NMD.v2022.1.Hs.grp                                                                                     | 2.48                                       | 0.00  | 4.00    | 1.42  | 0.11  | 0.96    | -2.21 | 0.00  | 4.00    |
|                            | REACTOME_RRNA_PROCESSING.v2022.1.Hs.grp                                                                                                 | 2.19                                       | 0.00  | 4.00    | 1.40  | 0.12  | 0.91    | -2.01 | 0.00  | 2.79    |
| Oxidative Phosphorylation  | GOBP_AEROBIC_RESPIRATION.v2022.1.Hs.grp                                                                                                 | 1.77                                       | 0.01  | 2.11    | 2.53  | 0.00  | 4.00    | 1.63  | 0.01  | 2.28    |
|                            | GOBP_OXIDATIVE_PHOSPHORYLATION.v2022.1.Hs.grp                                                                                           | 1.95                                       | 0.00  | 2.80    | 2.62  | 0.00  | 4.00    | 1.72  | 0.00  | 2.67    |
|                            | GOBP_ATP_SYNTHESIS_COUPLED_ELECTRON_TRANSPORT.v2022.1.Hs.grp                                                                            | 2.02                                       | 0.00  | 3.01    | 2.64  | 0.00  | 4.00    | 1.62  | 0.01  | 2.22    |
|                            | GOBP_RESPIRATORY_ELECTRON_TRANSPORT_CHAIN.v2022.1.Hs.grp                                                                                | 1.89                                       | 0.00  | 2.60    | 2.48  | 0.00  | 4.00    | 1.67  | 0.00  | 2.42    |
|                            | REACTOME_RESPIRATORY_ELECTRON_TRANSPORT_ATP_SYNTHESIS_BY_CHEMOSMOTIC_COUPLING_AND_HEAT_PRODUCTION_BY_UNCOUPLING_PROTEINS.v2022.1.Hs.grp | 1.81                                       | 0.01  | 2.27    | 2.69  | 0.00  | 4.00    | 1.74  | 0.00  | 2.77    |
|                            | GOBP_ATP_BIOSYNTHETIC_PROCESS.v2022.1.Hs.grp                                                                                            | 1.76                                       | 0.01  | 2.05    | 2.08  | 0.00  | 3.19    | 1.66  | 0.00  | 2.38    |
|                            | Hs.grp                                                                                                                                  | 1.54                                       | 0.04  | 1.44    | 2.31  | 0.00  | 4.00    | 1.60  | 0.01  | 2.16    |
|                            | GOBP_ELECTRON_TRANSPORT_CHAIN.v2022.1.Hs.grp                                                                                            | 1.59                                       | 0.03  | 1.52    | 2.30  | 0.00  | 4.00    | 1.72  | 0.00  | 2.69    |
|                            | REACTOME_RESPIRATORY_ELECTRON_TRANSPORT.v2022.1.Hs.grp                                                                                  | 1.83                                       | 0.00  | 2.36    | 2.53  | 0.00  | 4.00    | 1.62  | 0.01  | 2.22    |
|                            | KEGG_OXIDATIVE_PHOSPHORYLATION.v2022.1.Hs.grp                                                                                           | 1.85                                       | 0.00  | 2.41    | 2.31  | 0.00  | 4.00    | 1.69  | 0.00  | 2.57    |
|                            | REACTOME_COMPLEX_I_BIOGENESIS.v2022.1.Hs.grp                                                                                            | 1.83                                       | 0.00  | 2.37    | 2.13  | 0.00  | 3.23    | 1.58  | 0.01  | 2.10    |
| Myeloid Migration          | GOBP_NEUTROPHIL_MIGRATION.v2022.1.Hs.grp                                                                                                | 2.02                                       | 0.00  | 3.03    | -0.94 | 0.81  | 0.09    | 1.97  | 0.00  | 4.00    |
|                            | GOBP_MYELOID_LEUKOCYTE_MIGRATION.v2022.1.Hs.grp                                                                                         | 1.99                                       | 0.00  | 2.98    | -0.95 | 0.83  | 0.08    | 1.84  | 0.00  | 3.20    |
|                            | GOBP_NEUTROPHIL_CHEMOTAXIS.v2022.1.Hs.grp                                                                                               | 1.99                                       | 0.00  | 3.00    | 0.88  | 0.72  | 0.14    | 2.12  | 0.00  | 4.00    |
|                            | GOBP_GRANULOCYTE_MIGRATION.v2022.1.Hs.grp                                                                                               | 1.97                                       | 0.00  | 2.99    | 1.08  | 0.42  | 0.38    | 1.94  | 0.00  | 4.00    |
|                            | GOBP_LEUKOCYTE_CHEMOTAXIS.v2022.1.Hs.grp                                                                                                | 1.90                                       | 0.00  | 2.61    | -0.94 | 0.79  | 0.10    | 1.73  | 0.00  | 2.68    |
|                            | GOBP_GRANULOCYTE_CHEMOTAXIS.v2022.1.Hs.grp                                                                                              | 1.90                                       | 0.00  | 2.59    | 1.06  | 0.43  | 0.37    | 2.07  | 0.00  | 4.00    |
|                            | GOBP_CELL_CHEMOTAXIS.v2022.1.Hs.grp                                                                                                     | 1.89                                       | 0.00  | 2.61    | 1.05  | 0.44  | 0.35    | 1.72  | 0.00  | 2.68    |
|                            | GOBP_LEUKOCYTE_MIGRATION.v2022.1.Hs.grp                                                                                                 | 1.81                                       | 0.01  | 2.26    | -1.04 | 0.76  | 0.12    | 1.68  | 0.00  | 2.45    |
|                            | GOBP_TAXIS.v2022.1.Hs.grp                                                                                                               | 1.69                                       | 0.01  | 1.85    | 1.04  | 0.45  | 0.34    | 1.62  | 0.01  | 2.22    |
|                            |                                                                                                                                         | GOBP_GRANULOCYTE_ACTIVATION.v2022.1.Hs.grp | 1.47  | 0.06    | 1.26  | 1.16  | 0.31    | 0.50  | 1.52  | 0.02    |
| Myeloid Activation         | GOBP_POSITIVE_REGULATION_OF_MYELOID_CELL_DIFFERENTIATION.v2022.1.Hs.grp                                                                 | 1.53                                       | 0.04  | 1.39    | 1.03  | 0.47  | 0.33    | 1.49  | 0.02  | 1.69    |
|                            | GOBP_REGULATION_OF_MYELOID_LEUKOCYTE_MEDIATED_IMMUNITY.v2022.1.Hs.grp                                                                   | 0.91                                       | 0.64  | 0.19    | -0.80 | 0.92  | 0.03    | 1.48  | 0.02  | 1.65    |
|                            | GOBP_LEUKOCYTE_MEDIATED_CYTOTOXICITY.v2022.1.Hs.grp                                                                                     | 1.29                                       | 0.15  | 0.82    | -0.85 | 0.89  | 0.05    | 1.88  | 0.00  | 3.52    |
|                            | GOBP_FC_RECEPTOR_SIGNALING_PATHWAY.v2022.1.Hs.grp                                                                                       | 1.12                                       | 0.33  | 0.48    | -0.99 | 0.80  | 0.09    | 1.39  | 0.05  | 1.30    |
|                            | GOBP_REGULATION_OF_LEUKOCYTE_MEDIATED_CYTOTOXICITY.v2022.1.Hs.grp                                                                       | 1.16                                       | 0.28  | 0.55    | -1.03 | 0.73  | 0.14    | 1.72  | 0.00  | 2.66    |
|                            |                                                                                                                                         | GOBP_RESPONSE_TO_CHEMOKINE.v2022.1.Hs.grp  | 1.75  | 0.01    | 2.02  | -1.26 | 0.38    | 0.42  | 1.69  | 0.00    |
| Inflammation               | KEGG_CYTOKINE_CYTOKINE_RECEPTOR_INTERACTION.v2022.1.Hs.grp                                                                              | 1.56                                       | 0.04  | 1.46    | -1.40 | 0.24  | 0.62    | 1.52  | 0.02  | 1.79    |
|                            | HALLMARK_IL6_JAK_STAT3_SIGNALING.v2022.1.Hs.grp                                                                                         | 1.55                                       | 0.04  | 1.45    | -1.48 | 0.17  | 0.77    | 1.48  | 0.02  | 1.63    |
|                            | GOBP_POSITIVE_REGULATION_OF_TUMOR_NECROSIS_FACTOR_SUPERFAMILY_CYTOKINE_PRODUCTION.v2022.1.Hs.grp                                        | 1.57                                       | 0.03  | 1.47    | -1.26 | 0.37  | 0.44    | 1.59  | 0.01  | 2.12    |
|                            | GOBP_NEGATIVE_REGULATION_OF_VIRAL_GENOME_REPLICATION.v2022.1.Hs.grp                                                                     | 1.93                                       | 0.00  | 2.72    | 1.53  | 0.06  | 1.20    | 1.35  | 0.07  | 1.17    |
|                            | GOBP_TUMOR_NECROSIS_FACTOR_SUPERFAMILY_CYTOKINE_PRODUCTION.v2022.1.Hs.grp                                                               | 1.81                                       | 0.01  | 2.26    | 0.97  | 0.56  | 0.25    | 1.56  | 0.01  | 1.98    |
|                            | HALLMARK_TNFA_SIGNALING_VIA_NFKB.v2022.1.Hs.grp                                                                                         | 1.61                                       | 0.03  | 1.58    | -2.35 | 0.00  | 4.00    | 1.44  | 0.03  | 1.49    |
|                            | REACTOME_INTERFERON_ALPHA_BETA_SIGNALING.v2022.1.Hs.grp                                                                                 | 1.96                                       | 0.00  | 2.88    | 1.87  | 0.01  | 2.14    | 1.58  | 0.01  | 2.09    |
|                            | HALLMARK_INTERFERON_ALPHA_RESPONSE.v2022.1.Hs.grp                                                                                       | 2.17                                       | 0.00  | 3.82    | 1.79  | 0.02  | 1.76    | 1.57  | 0.01  | 2.06    |
|                            | HALLMARK_INTERFERON_GAMMA_RESPONSE.v2022.1.Hs.grp                                                                                       | 2.04                                       | 0.00  | 3.09    | 0.92  | 0.64  | 0.19    | 1.47  | 0.03  | 1.60    |
|                            | GOBP_ACUTE_INFLAMMATORY_RESPONSE.v2022.1.Hs.grp                                                                                         | 2.02                                       | 0.00  | 2.99    | 1.41  | 0.12  | 0.93    | 1.76  | 0.00  | 2.79    |
|                            | HALLMARK_ALLOGRAFT_REJECTION.v2022.1.Hs.grp                                                                                             | 1.72                                       | 0.01  | 1.92    | -0.92 | 0.80  | 0.10    | 1.59  | 0.01  | 2.11    |
|                            | HALLMARK_INFLAMMATORY_RESPONSE.v2022.1.Hs.grp                                                                                           | 1.97                                       | 0.00  | 2.96    | -1.51 | 0.15  | 0.82    | 1.49  | 0.02  | 1.67    |

**Supplemental Table 4 Continued: GSEA on scRNAseq Populations, related to Figure 6**  
**NES=Normalized Enrichment Score, FDR=False Discovery Rate**

| Group                                                                     | MSigDB Signature Name                                                                                                                    | Combo vs GSK |       |         |       |       |         |       |       |         |
|---------------------------------------------------------------------------|------------------------------------------------------------------------------------------------------------------------------------------|--------------|-------|---------|-------|-------|---------|-------|-------|---------|
|                                                                           |                                                                                                                                          | Macs/Dend    |       |         | Neus  |       |         | Tumor |       |         |
|                                                                           |                                                                                                                                          | NES          | FDR q | -Log(q) | NES   | FDR q | -Log(q) | NES   | FDR q | -Log(q) |
| DNA Replication and Damage                                                | REACTOME_G1_S_DNA_DAMAGE_CHECKPOINTS.v2022.1.Hs.grp                                                                                      | 1.72         | 0.01  | 2.20    | 1.09  | 0.39  |         | 1.30  | 0.12  | 0.92    |
|                                                                           | REACTOME_ORC1_REMOVAL_FROM_CHROMATIN.v2022.1.Hs.grp                                                                                      | 1.76         | 0.00  | 2.38    | 1.29  | 0.20  | 0.69    | 1.27  | 0.14  | 0.84    |
|                                                                           | REACTOME_SWITCHING_OF_ORIGINS_TO_A_POST_REPLICATIVE_STATE.v2022.1.Hs.grp                                                                 | 1.65         | 0.01  | 1.96    | 1.20  | 0.26  | 0.58    | 1.23  | 0.18  | 0.75    |
|                                                                           | REACTOME_CDT1_ASSOCIATION_WITH_THE_CDC6_ORC_ORIGIN_COMPLEX.v2022.1.Hs.grp                                                                | 1.76         | 0.00  | 2.37    | 1.30  | 0.20  | 0.69    | 1.21  | 0.19  | 0.71    |
|                                                                           | REACTOME_SYNTHESIS_OF_DNA.v2022.1.Hs.grp                                                                                                 | 1.62         | 0.01  | 1.84    | 1.18  | 0.29  | 0.54    | 1.20  | 0.20  | 0.69    |
| REACTOME_APC_C_MEDIATED_DEGRADATION_OF_CELL_CYCLE_PROTEINS.v2022.1.Hs.grp | 1.66                                                                                                                                     | 0.01         | 2.00  | 1.22    | 0.25  | 0.60  | 1.20    | 0.20  | 0.69  |         |
| Protein and RNA Processing                                                | KEGG_RIBOSOME.v2022.1.Hs.grp                                                                                                             | 2.59         | 0.00  | 4.00    | -1.30 | 0.31  | 0.50    | -2.15 | 0.00  | 3.86    |
|                                                                           | REACTOME_EUKARYOTIC_TRANSLATION_ELONGATION.v2022.1.Hs.grp                                                                                | 2.61         | 0.00  | 4.00    | -1.43 | 0.28  | 0.55    | -2.28 | 0.00  | 4.00    |
|                                                                           | REACTOME_SRP_DEPENDENT_COTRANSLATIONAL_PROTEIN_TARGETING_TO_MEMBRANE.v2022.1.Hs.grp                                                      | 2.51         | 0.00  | 4.00    | -1.25 | 0.33  | 0.48    | -2.12 | 0.00  | 3.70    |
|                                                                           | REACTOME_RESPONSE_OF_EIF2AK4_GCN2_TO_AMINO_ACID_DEFICIENCY.v2022.1.Hs.grp                                                                | 2.63         | 0.00  | 4.00    | -1.40 | 0.33  | 0.49    | -2.27 | 0.00  | 4.00    |
|                                                                           | REACTOME_EUKARYOTIC_TRANSLATION_INITIATION.v2022.1.Hs.grp                                                                                | 2.52         | 0.00  | 4.00    | -1.38 | 0.27  | 0.57    | -2.09 | 0.00  | 3.48    |
|                                                                           | REACTOME_INFLUENZA_INFECTION.v2022.1.Hs.grp                                                                                              | 2.53         | 0.00  | 4.00    | -1.40 | 0.30  | 0.52    | -2.18 | 0.00  | 3.76    |
|                                                                           | GOBP_CYTOPLASMIC_TRANSLATION.v2022.1.Hs.grp                                                                                              | 2.41         | 0.00  | 4.00    | -1.46 | 0.25  | 0.60    | -2.18 | 0.00  | 3.81    |
|                                                                           | REACTOME_TRANSLATION.v2022.1.Hs.grp                                                                                                      | 2.29         | 0.00  | 4.00    | -1.29 | 0.33  | 0.48    | -2.02 | 0.00  | 3.36    |
|                                                                           | REACTOME_SELENOAMINO_ACID_METABOLISM.v2022.1.Hs.grp                                                                                      | 2.56         | 0.00  | 4.00    | -1.36 | 0.29  | 0.54    | -2.24 | 0.00  | 4.00    |
|                                                                           | REACTOME_CELLULAR_RESPONSE_TO_STARVATION.v2022.1.Hs.grp                                                                                  | 2.39         | 0.00  | 4.00    | -1.59 | 0.24  | 0.61    | -2.05 | 0.00  | 3.31    |
|                                                                           | REACTOME_METABOLISM_OF_AMINO_ACIDS_AND_DERIVATIVES.v2022.1.Hs.grp                                                                        | 2.21         | 0.00  | 4.00    | -1.09 | 0.54  | 0.27    | -1.66 | 0.01  | 1.85    |
|                                                                           | REACTOME_NONSENSE_MEDIATED_DECAY_NMD.v2022.1.Hs.grp                                                                                      | 2.58         | 0.00  | 4.00    | -1.34 | 0.32  | 0.49    | -2.14 | 0.00  | 3.90    |
| REACTOME_RRNA_PROCESSING.v2022.1.Hs.grp                                   | 2.39                                                                                                                                     | 0.00         | 4.00  | -1.38   | 0.28  | 0.55  | -2.13   | 0.00  | 3.67  |         |
| Oxidative Phosphorylation                                                 | GOBP_AEROBIC_RESPIRATION.v2022.1.Hs.grp                                                                                                  | 2.05         | 0.00  | 3.93    | 1.93  | 0.09  | 1.06    | 1.82  | 0.00  | 3.70    |
|                                                                           | GOBP_OXIDATIVE_PHOSPHORYLATION.v2022.1.Hs.grp                                                                                            | 2.14         | 0.00  | 4.00    | 1.90  | 0.06  | 1.26    | 1.92  | 0.00  | 3.82    |
|                                                                           | GOBP_ATP_SYNTHESIS_COUPLED_ELECTRON_TRANSPORT.v2022.1.Hs.grp                                                                             | 2.14         | 0.00  | 4.00    | 1.83  | 0.06  | 1.23    | 1.88  | 0.00  | 3.97    |
|                                                                           | GOBP_RESPIRATORY_ELECTRON_TRANSPORT_CHAIN.v2022.1.Hs.grp                                                                                 | 2.06         | 0.00  | 3.91    | 1.81  | 0.05  | 1.28    | 1.88  | 0.00  | 3.94    |
|                                                                           | REACTOME_RESPIRATORY_ELECTRON_TRANSPORT_ATP_SYNTHESIS_BY_CHEMIOSMOTIC_COUPLING_AND_HEAT_PRODUCTION_BY_UNCOUPLING_PROTEINS.v2022.1.Hs.grp | 2.07         | 0.00  | 3.88    | 1.78  | 0.06  | 1.19    | 1.96  | 0.00  | 4.00    |
|                                                                           | GOBP_ATP_BIOSYNTHETIC_PROCESS.v2022.1.Hs.grp                                                                                             | 2.08         | 0.00  | 3.85    | 1.72  | 0.06  | 1.24    | 1.98  | 0.00  | 4.00    |
|                                                                           | REACTOME_THE_CITRIC_ACID_TCA_CYCLE_AND_RESPIRATORY_ELECTRON_TRANSPORT.v2022.1.Hs.grp                                                     | 1.96         | 0.00  | 3.45    | 1.72  | 0.05  | 1.26    | 1.87  | 0.00  | 4.04    |
|                                                                           | GOBP_ELECTRON_TRANSPORT_CHAIN.v2022.1.Hs.grp                                                                                             | 1.84         | 0.00  | 2.70    | 1.71  | 0.05  | 1.26    | 1.88  | 0.00  | 4.19    |
|                                                                           | REACTOME_RESPIRATORY_ELECTRON_TRANSPORT.v2022.1.Hs.grp                                                                                   | 1.95         | 0.00  | 3.41    | 1.70  | 0.05  | 1.30    | 1.91  | 0.00  | 4.04    |
|                                                                           | KEGG_OXIDATIVE_PHOSPHORYLATION.v2022.1.Hs.grp                                                                                            | 2.07         | 0.00  | 3.87    | 1.65  | 0.06  | 1.21    | 2.05  | 0.00  | 4.00    |
| REACTOME_COMPLEX_I_BIOGENESIS.v2022.1.Hs.grp                              | 1.85                                                                                                                                     | 0.00         | 2.77  | 1.58    | 0.08  | 1.09  | 1.80    | 0.00  | 3.38  |         |
| Myeloid Migration                                                         | GOBP_NEUTROPHIL_MIGRATION.v2022.1.Hs.grp                                                                                                 | 1.81         | 0.00  | 2.59    | 1.43  | 0.14  | 0.84    | 1.83  | 0.00  | 3.72    |
|                                                                           | GOBP_MYELOID_LEUKOCYTE_MIGRATION.v2022.1.Hs.grp                                                                                          | 1.88         | 0.00  | 2.95    | 1.38  | 0.17  | 0.78    | 1.84  | 0.00  | 3.72    |
|                                                                           | GOBP_NEUTROPHIL_CHEMOTAXIS.v2022.1.Hs.grp                                                                                                | 1.84         | 0.00  | 2.70    | 1.26  | 0.21  | 0.68    | 1.75  | 0.00  | 3.07    |
|                                                                           | GOBP_GRANULOCYTE_MIGRATION.v2022.1.Hs.grp                                                                                                | 1.89         | 0.00  | 2.99    | 1.54  | 0.09  | 1.03    | 1.75  | 0.00  | 3.07    |
|                                                                           | GOBP_LEUKOCYTE_CHEMOTAXIS.v2022.1.Hs.grp                                                                                                 | 1.91         | 0.00  | 3.14    | 1.35  | 0.17  | 0.76    | 1.51  | 0.02  | 1.72    |
|                                                                           | GOBP_GRANULOCYTE_CHEMOTAXIS.v2022.1.Hs.grp                                                                                               | 1.90         | 0.00  | 3.05    | 1.39  | 0.16  | 0.79    | 1.71  | 0.00  | 2.84    |
|                                                                           | GOBP_CELL_CHEMOTAXIS.v2022.1.Hs.grp                                                                                                      | 1.98         | 0.00  | 3.60    | 1.58  | 0.08  | 1.11    | 1.64  | 0.00  | 2.41    |
|                                                                           | GOBP_LEUKOCYTE_MIGRATION.v2022.1.Hs.grp                                                                                                  | 1.80         | 0.00  | 2.54    | 1.43  | 0.14  | 0.84    | 1.68  | 0.00  | 2.68    |
|                                                                           | GOBP_TAXIS.v2022.1.Hs.grp                                                                                                                | 1.76         | 0.00  | 2.38    | 1.50  | 0.12  | 0.91    | 1.62  | 0.01  | 2.29    |
|                                                                           | GOBP_REGULATION_OF_LEUKOCYTE_MIGRATION.v2022.1.Hs.grp                                                                                    | 1.81         | 0.00  | 2.59    | 1.43  | 0.14  | 0.84    | 1.83  | 0.00  | 3.72    |
| Myeloid Activation                                                        | GOBP_GRANULOCYTE_ACTIVATION.v2022.1.Hs.grp                                                                                               | 1.57         | 0.02  | 1.66    | 1.55  | 0.09  | 1.03    | 1.73  | 0.00  | 3.01    |
|                                                                           | GOBP_POSITIVE_REGULATION_OF_MYELOID_CELL_DIFFERENTIATION.v2022.1.Hs.grp                                                                  | 1.29         | 0.15  | 0.83    | 1.08  | 0.39  | 0.41    | 1.76  | 0.00  | 3.16    |
|                                                                           | GOBP_REGULATION_OF_MYELOID_LEUKOCYTE_MEDIATED_IMMUNITY.v2022.1.Hs.grp                                                                    | 1.39         | 0.08  | 1.10    | 1.19  | 0.28  | 0.55    | 1.79  | 0.00  | 3.35    |
|                                                                           | GOBP_LEUKOCYTE_MEDIATED_CYTOTOXICITY.v2022.1.Hs.grp                                                                                      | 1.35         | 0.10  | 1.00    | 0.91  | 0.65  | 0.19    | 1.72  | 0.00  | 2.95    |
|                                                                           | GOBP_FC_RECEPTOR_SIGNALING_PATHWAY.v2022.1.Hs.grp                                                                                        | 1.39         | 0.08  | 1.10    | 0.94  | 0.60  | 0.22    | 1.77  | 0.00  | 3.19    |
|                                                                           | GOBP_REGULATION_OF_LEUKOCYTE_MEDIATED_CYTOTOXICITY.v2022.1.Hs.grp                                                                        | 1.12         | 0.31  | 0.50    | -0.69 | 0.99  | 0.00    | 1.79  | 0.00  | 3.39    |
| Inflammation                                                              | GOBP_RESPONSE_TO_CHEMOKINE.v2022.1.Hs.grp                                                                                                | 1.61         | 0.02  | 1.82    | -0.90 | 0.79  | 0.10    | 1.73  | 0.00  | 3.00    |
|                                                                           | KEGG_CYTOKINE_CYTOKINE_RECEPTOR_INTERACTION.v2022.1.Hs.grp                                                                               | 1.62         | 0.01  | 1.83    | 0.84  | 0.78  | 0.11    | 1.64  | 0.00  | 2.37    |
|                                                                           | HALLMARK_IL6_JAK_STAT3_SIGNALING.v2022.1.Hs.grp                                                                                          | 1.67         | 0.01  | 2.02    | 0.66  | 0.96  | 0.02    | 1.50  | 0.02  | 1.66    |
|                                                                           | GOBP_POSITIVE_REGULATION_OF_TUMOR_NECROSIS_FACTOR_SUPERFAMILY_CYTOKINE_PRODUCTION.v2022.1.Hs.grp                                         | 1.24         | 0.18  | 0.75    | -1.12 | 0.48  | 0.32    | 1.89  | 0.00  | 4.15    |
|                                                                           | GOBP_NEGATIVE_REGULATION_OF_VIRAL_GENOME_REPLICATION.v2022.1.Hs.grp                                                                      | 1.52         | 0.03  | 1.51    | 1.66  | 0.06  | 1.26    | 1.83  | 0.00  | 3.70    |
|                                                                           | GOBP_TUMOR_NECROSIS_FACTOR_SUPERFAMILY_CYTOKINE_PRODUCTION.v2022.1.Hs.grp                                                                | 1.38         | 0.08  | 1.09    | -0.87 | 0.83  | 0.08    | 1.77  | 0.00  | 3.17    |
|                                                                           | HALLMARK_TNFA_SIGNALING_VIA_NFKB.v2022.1.Hs.grp                                                                                          | 1.65         | 0.01  | 1.96    | -1.33 | 0.32  | 0.49    | 1.38  | 0.06  | 1.20    |
|                                                                           | REACTOME_INTERFERON_ALPHA_BETA_SIGNALING.v2022.1.Hs.grp                                                                                  | 1.67         | 0.01  | 2.01    | 1.12  | 0.35  | 0.46    | 1.73  | 0.00  | 3.01    |
|                                                                           | HALLMARK_INTERFERON_ALPHA_RESPONSE.v2022.1.Hs.grp                                                                                        | 1.83         | 0.00  | 2.69    | 1.43  | 0.15  | 0.84    | 1.84  | 0.00  | 3.74    |
|                                                                           | HALLMARK_INTERFERON_GAMMA_RESPONSE.v2022.1.Hs.grp                                                                                        | 1.98         | 0.00  | 3.57    | 1.30  | 0.20  | 0.70    | 1.78  | 0.00  | 3.28    |
|                                                                           | GOBP_ACUTE_INFLAMMATORY_RESPONSE.v2022.1.Hs.grp                                                                                          | 1.85         | 0.00  | 2.74    | 1.68  | 0.06  | 1.24    | 1.71  | 0.00  | 2.83    |
|                                                                           | HALLMARK_ALLOGRAFT_REJECTION.v2022.1.Hs.grp                                                                                              | 1.94         | 0.00  | 3.33    | 0.96  | 0.57  | 0.24    | 1.53  | 0.02  | 1.78    |
| HALLMARK_INFLAMMATORY_RESPONSE.v2022.1.Hs.grp                             | 1.82                                                                                                                                     | 0.00         | 2.66  | 1.07    | 0.40  | 0.39  | 1.71    | 0.00  | 2.84  |         |

**Supplemental Table 5: GSEA on scRNAseq Populations, related to Figure 6**  
**NES=Normalized Enrichment Score, FDR=False Discovery Rate**

| Group                      | MSigDB Signature Name                                                                                                                 | Combo vs Placebo |               |      |               |       |               |       |      |      |
|----------------------------|---------------------------------------------------------------------------------------------------------------------------------------|------------------|---------------|------|---------------|-------|---------------|-------|------|------|
|                            |                                                                                                                                       | Macs/Dend        |               | Neus |               | Tumor |               |       |      |      |
|                            |                                                                                                                                       | NES              | FDR q -Log(q) | NES  | FDR q -Log(q) | NES   | FDR q -Log(q) |       |      |      |
| DNA Replication and Damage | REACTOME_G1_S_DNA_DAMAGE_CHECKPOINTS.v2022.1.Hs.grp                                                                                   | 2.19             | 0.00          | 4.00 | 1.86          | 0.00  | 2.76          | 1.50  | 0.03 | 1.60 |
|                            | REACTOME_ORC1_REMOVAL_FROM_CHROMATIN.v2022.1.Hs.grp                                                                                   | 2.27             | 0.00          | 4.00 | 1.95          | 0.00  | 3.16          | 1.44  | 0.04 | 1.39 |
|                            | REACTOME_SWITCHING_OF_ORIGINS_TO_A_POST_REPLICATIVE_STATE.v2022.1.Hs.grp                                                              | 2.18             | 0.00          | 4.00 | 1.95          | 0.00  | 3.16          | 1.42  | 0.05 | 1.33 |
|                            | REACTOME_CDT1_ASSOCIATION_WITH_THE_CDC6_ORC_ORIGIN_COMPLEX.v2022.1.Hs.grp                                                             | 2.22             | 0.00          | 4.00 | 1.88          | 0.00  | 2.86          | 1.47  | 0.03 | 1.52 |
|                            | REACTOME_SYNTHESIS_OF_DNA.v2022.1.Hs.grp                                                                                              | 2.06             | 0.00          | 4.01 | 2.01          | 0.00  | 3.50          | 1.39  | 0.06 | 1.23 |
|                            | REACTOME_APC_C_MEDIATED_DEGRADATION_OF_CELL_CYCLE_PROTEINS.v2022.1.Hs.grp                                                             | 2.18             | 0.00          | 4.00 | 1.96          | 0.00  | 3.18          | 1.47  | 0.03 | 1.52 |
| Protein and RNA Processing | KEGG_RIBOSOME.v2022.1.Hs.grp                                                                                                          | 3.06             | 0.00          | 4.00 | 3.34          | 0.00  | 4.00          | 1.61  | 0.01 | 2.04 |
|                            | REACTOME_EUKARYOTIC_TRANSLATION_ELONGATION.v2022.1.Hs.grp                                                                             | 3.06             | 0.00          | 4.00 | 3.33          | 0.00  | 4.00          | 1.57  | 0.01 | 1.90 |
|                            | REACTOME_SRP_DEPENDENT_COTRANSLATIONAL_PROTEIN_TARGETING_TO_MEMBRANE.v2022.1.Hs.grp                                                   | 3.03             | 0.00          | 4.00 | 3.34          | 0.00  | 4.00          | 1.58  | 0.01 | 1.92 |
|                            | REACTOME_RESPONSE_OF_EIF2AK4_GCN2_TO_AMINO_ACID_DEFICIENCY.v2022.1.Hs.grp                                                             | 3.06             | 0.00          | 4.00 | 3.32          | 0.00  | 4.00          | 1.52  | 0.02 | 1.68 |
|                            | REACTOME_EUKARYOTIC_TRANSLATION_INITIATION.v2022.1.Hs.grp                                                                             | 2.94             | 0.00          | 4.00 | 3.36          | 0.00  | 4.00          | 1.58  | 0.01 | 1.92 |
|                            | REACTOME_INFLUENZA_INFECTION.v2022.1.Hs.grp                                                                                           | 2.89             | 0.00          | 4.00 | 3.23          | 0.00  | 4.00          | 1.33  | 0.09 | 1.02 |
|                            | GOBP_CYTOPLASMIC_TRANSLATION.v2022.1.Hs.grp                                                                                           | 2.81             | 0.00          | 4.00 | 3.26          | 0.00  | 4.00          | 1.48  | 0.03 | 1.53 |
|                            | REACTOME_TRANSLATION.v2022.1.Hs.grp                                                                                                   | 2.81             | 0.00          | 4.00 | 3.21          | 0.00  | 4.00          | 1.35  | 0.08 | 1.11 |
|                            | REACTOME_SELENOAMINO_ACID_METABOLISM.v2022.1.Hs.grp                                                                                   | 3.04             | 0.00          | 4.00 | 3.36          | 0.00  | 4.00          | 1.50  | 0.02 | 1.61 |
|                            | REACTOME_CELLULAR_RESPONSE_TO_STARVATION.v2022.1.Hs.grp                                                                               | 2.86             | 0.00          | 4.00 | 3.22          | 0.00  | 4.00          | 1.54  | 0.02 | 1.72 |
|                            | REACTOME_METABOLISM_OF_AMINO_ACIDS_AND_DERIVATIVES.v2022.1.Hs.grp                                                                     | 2.72             | 0.00          | 4.00 | 3.06          | 0.00  | 4.00          | 1.41  | 0.05 | 1.32 |
|                            | REACTOME_NONSENSE_MEDIATED_DECAY_NMD.v2022.1.Hs.grp                                                                                   | 2.93             | 0.00          | 4.00 | 3.33          | 0.00  | 4.00          | 1.50  | 0.02 | 1.61 |
|                            | REACTOME_RRNA_PROCESSING.v2022.1.Hs.grp                                                                                               | 2.93             | 0.00          | 4.00 | 3.28          | 0.00  | 4.00          | 1.48  | 0.03 | 1.55 |
| Oxidative Phosphorylation  | GOBP_AEROBIC_RESPIRATION.v2022.1.Hs.grp                                                                                               | 1.70             | 0.01          | 2.12 | 2.59          | 0.00  | 4.00          | 1.86  | 0.00 | 3.69 |
|                            | GOBP_OXIDATIVE_PHOSPHORYLATION.v2022.1.Hs.grp                                                                                         | 1.88             | 0.00          | 2.91 | 2.66          | 0.00  | 4.00          | 1.96  | 0.00 | 4.13 |
|                            | GOBP_ATP_SYNTHESIS_COUPLED_ELECTRON_TRANSPORT.v2022.1.Hs.grp                                                                          | 1.83             | 0.00          | 2.73 | 2.54          | 0.00  | 4.00          | 1.92  | 0.00 | 3.99 |
|                            | GOBP_RESPIRATORY_ELECTRON_TRANSPORT_CHAIN.v2022.1.Hs.grp                                                                              | 1.71             | 0.01          | 2.15 | 2.47          | 0.00  | 4.00          | 1.91  | 0.00 | 3.86 |
|                            | REACTOME_RESPIRATORY_ELECTRON_TRANSPORT_ATP_SYNTHESIS_BY_CHEMOSMOTIC_COUPLING_AND_HEAT_PRODUCED_BY_UNCOUPLING_PROTEINS.v2022.1.Hs.grp | 1.75             | 0.00          | 2.32 | 2.69          | 0.00  | 4.00          | 2.10  | 0.00 | 4.00 |
|                            | GOBP_ATP_BIOSYNTHETIC_PROCESS.v2022.1.Hs.grp                                                                                          | 1.84             | 0.00          | 2.73 | 2.45          | 0.00  | 4.00          | 2.06  | 0.00 | 4.00 |
|                            | REACTOME_THE_CITRIC_ACID_TCA_CYCLE_AND_RESPIRATORY_ELECTRON_TRANSPORT.v2022.1.Hs.grp                                                  | 1.48             | 0.04          | 1.43 | 2.64          | 0.00  | 4.00          | 1.92  | 0.00 | 3.97 |
|                            | GOBP_ELECTRON_TRANSPORT_CHAIN.v2022.1.Hs.grp                                                                                          | 1.46             | 0.04          | 1.36 | 2.27          | 0.00  | 4.00          | 1.90  | 0.00 | 3.77 |
|                            | REACTOME_RESPIRATORY_ELECTRON_TRANSPORT.v2022.1.Hs.grp                                                                                | 1.70             | 0.01          | 2.13 | 2.53          | 0.00  | 4.00          | 2.01  | 0.00 | 3.79 |
|                            | KEGG_OXIDATIVE_PHOSPHORYLATION.v2022.1.Hs.grp                                                                                         | 1.69             | 0.01          | 2.12 | 2.63          | 0.00  | 4.00          | 2.13  | 0.00 | 4.00 |
|                            | REACTOME_COMPLEX_I_BIOGENESIS.v2022.1.Hs.grp                                                                                          | 1.82             | 0.00          | 2.63 | 2.20          | 0.00  | 4.00          | 1.90  | 0.00 | 3.75 |
| Myeloid Migration          | GOBP_NEUTROPHIL_MIGRATION.v2022.1.Hs.grp                                                                                              | -1.43            | 0.06          | 1.25 | -1.49         | 0.08  | 1.11          | 1.16  | 0.27 | 0.57 |
|                            | GOBP_MYELOID_LEUKOCYTE_MIGRATION.v2022.1.Hs.grp                                                                                       | -1.51            | 0.04          | 1.43 | -1.43         | 0.10  | 1.00          | 1.30  | 0.11 | 0.94 |
|                            | GOBP_NEUTROPHIL_CHEMOTAXIS.v2022.1.Hs.grp                                                                                             | -1.41            | 0.07          | 1.18 | -1.50         | 0.07  | 1.13          | 1.20  | 0.22 | 0.66 |
|                            | GOBP_GRANULOCYTE_MIGRATION.v2022.1.Hs.grp                                                                                             | -1.49            | 0.04          | 1.40 | -1.43         | 0.10  | 0.99          | 1.23  | 0.18 | 0.74 |
|                            | GOBP_LEUKOCYTE_CHEMOTAXIS.v2022.1.Hs.grp                                                                                              | -1.50            | 0.04          | 1.43 | -1.76         | 0.01  | 1.84          | 1.09  | 0.37 | 0.43 |
|                            | GOBP_GRANULOCYTE_CHEMOTAXIS.v2022.1.Hs.grp                                                                                            | -1.50            | 0.04          | 1.43 | -1.46         | 0.09  | 1.06          | 1.25  | 0.17 | 0.78 |
|                            | GOBP_CELL_CHEMOTAXIS.v2022.1.Hs.grp                                                                                                   | -1.50            | 0.04          | 1.43 | -1.84         | 0.01  | 2.03          | 1.19  | 0.23 | 0.64 |
|                            | GOBP_LEUKOCYTE_MIGRATION.v2022.1.Hs.grp                                                                                               | -1.60            | 0.02          | 1.64 | -1.78         | 0.01  | 1.89          | 1.13  | 0.31 | 0.51 |
|                            | GOBP_TAXIS.v2022.1.Hs.grp                                                                                                             | -1.65            | 0.02          | 1.81 | -1.72         | 0.02  | 1.77          | 1.14  | 0.31 | 0.51 |
| Myeloid Activation         | GOBP_GRANULOCYTE_ACTIVATION.v2022.1.Hs.grp                                                                                            | -1.19            | 0.22          | 0.65 | -1.21         | 0.24  | 0.62          | 1.04  | 0.47 | 0.33 |
|                            | GOBP_POSITIVE_REGULATION_OF_MYELOID_CELL_DIFFERENTIATION.v2022.1.Hs.grp                                                               | -1.44            | 0.05          | 1.28 | -1.80         | 0.01  | 1.91          | 0.75  | 0.88 | 0.06 |
|                            | GOBP_REGULATION_OF_MYELOID_LEUKOCYTE_MEDIATED_IMMUNITY.v2022.1.Hs.grp                                                                 | -0.84            | 0.78          | 0.11 | -1.05         | 0.45  | 0.35          | -1.00 | 0.47 | 0.33 |
|                            | GOBP_LEUKOCYTE_MEDIATED_CYTOTOXICITY.v2022.1.Hs.grp                                                                                   | 1.23             | 0.16          | 0.79 | -1.33         | 0.16  | 0.81          | 1.42  | 0.05 | 1.33 |
|                            | GOBP_FC_RECEPTOR_SIGNALING_PATHWAY.v2022.1.Hs.grp                                                                                     | -0.91            | 0.66          | 0.18 | -1.51         | 0.07  | 1.14          | 0.67  | 0.93 | 0.03 |
|                            | GOBP_REGULATION_OF_LEUKOCYTE_MEDIATED_CYTOTOXICITY.v2022.1.Hs.grp                                                                     | 1.22             | 0.17          | 0.77 | -1.58         | 0.05  | 1.32          | 0.97  | 0.58 | 0.23 |
| Inflammation               | GOBP_RESPONSE_TO_CHEMOKINE.v2022.1.Hs.grp                                                                                             | -1.90            | 0.00          | 2.76 | -2.13         | 0.00  | 4.00          | -1.25 | 0.16 | 0.81 |
|                            | KEGG_CYTOKINE_CYTOKINE_RECEPTOR_INTERACTION.v2022.1.Hs.grp                                                                            | -1.56            | 0.03          | 1.56 | -1.79         | 0.01  | 1.93          | -1.97 | 0.00 | 2.45 |
|                            | HALLMARK_IL6_JAK_STAT3_SIGNALING.v2022.1.Hs.grp                                                                                       | -1.55            | 0.03          | 1.53 | -1.97         | 0.00  | 2.37          | -1.15 | 0.24 | 0.61 |
|                            | p                                                                                                                                     | 0.94             | 0.58          | 0.24 | -0.99         | 0.52  | 0.28          | 1.38  | 0.06 | 1.19 |
|                            | GOBP_NEGATIVE_REGULATION_OF_VIRAL_GENOME_REPLICATION.v2022.1.Hs.grp                                                                   | 1.30             | 0.11          | 0.97 | 1.12          | 0.29  | 0.54          | -2.23 | 0.00 | 2.47 |
|                            | GOBP_TUMOR_NECROSIS_FACTOR_SUPERFAMILY_CYTOKINE_PRODUCTION.v2022.1.Hs.grp                                                             | -1.04            | 0.43          | 0.37 | -0.99         | 0.53  | 0.28          | 1.08  | 0.39 | 0.41 |
|                            | HALLMARK_TNFA_SIGNALING_VIA_NFKB.v2022.1.Hs.grp                                                                                       | -2.36            | 0.00          | 4.00 | -3.21         | 0.00  | 4.00          | -1.41 | 0.07 | 1.18 |
|                            | REACTOME_INTERFERON_ALPHA_BETA_SIGNALING.v2022.1.Hs.grp                                                                               | 1.52             | 0.03          | 1.52 | 1.22          | 0.18  | 0.74          | -2.17 | 0.00 | 2.77 |
|                            | HALLMARK_INTERFERON_ALPHA_RESPONSE.v2022.1.Hs.grp                                                                                     | 1.44             | 0.05          | 1.34 | 1.39          | 0.08  | 1.11          | -2.14 | 0.00 | 2.93 |
|                            | HALLMARK_INTERFERON_GAMMA_RESPONSE.v2022.1.Hs.grp                                                                                     | 1.32             | 0.10          | 1.00 | -0.98         | 0.54  | 0.27          | -1.44 | 0.06 | 1.21 |
|                            | GOBP_ACUTE_INFLAMMATORY_RESPONSE.v2022.1.Hs.grp                                                                                       | 1.63             | 0.01          | 1.87 | -1.54         | 0.06  | 1.21          | 1.36  | 0.08 | 1.12 |
|                            | HALLMARK_ALLOGRAFT_REJECTION.v2022.1.Hs.grp                                                                                           | 1.36             | 0.08          | 1.11 | -1.03         | 0.47  | 0.33          | 1.06  | 0.43 | 0.36 |
|                            | HALLMARK_INFLAMMATORY_RESPONSE.v2022.1.Hs.grp                                                                                         | -1.55            | 0.03          | 1.52 | -1.90         | 0.01  | 2.28          | -1.47 | 0.06 | 1.22 |



**Supplemental Table 5 Continued: GSEA on scRNAseq Populations, related to Figure 6**  
**NES=Normalized Enrichment Score, FDR=False Discovery Rate**

| Group                                         | MSigDB Signature Name                                                                                                                 | GSK vs Placebo |              |       |              |       |              |       |      |      |
|-----------------------------------------------|---------------------------------------------------------------------------------------------------------------------------------------|----------------|--------------|-------|--------------|-------|--------------|-------|------|------|
|                                               |                                                                                                                                       | Macs/Dend      |              | Neus  |              | Tumor |              |       |      |      |
|                                               |                                                                                                                                       | NES            | FDR q-Log(q) | NES   | FDR q-Log(q) | NES   | FDR q-Log(q) |       |      |      |
| DNA Replication and Damage                    | REACTOME_G1_S_DNA_DAMAGE_CHECKPOINTS.v2022.1.Hs.grp                                                                                   | 1.87           | 0.00         | 2.68  | 1.83         | 0.00  | 2.66         | 1.14  | 0.35 | 0.46 |
|                                               | REACTOME_ORC1_REMOVAL_FROM_CHROMATIN.v2022.1.Hs.grp                                                                                   | 2.09           | 0.00         | 4.15  | 1.89         | 0.00  | 2.83         | 1.19  | 0.32 | 0.49 |
|                                               | REACTOME_SWITCHING_OF_ORIGINS_TO_A_POST_REPLICATIVE_STATE.v2022.1.Hs.grp                                                              | 2.02           | 0.00         | 3.39  | 1.97         | 0.00  | 3.13         | 1.13  | 0.36 | 0.45 |
|                                               | REACTOME_CDT1_ASSOCIATION_WITH_THE_CDC6_ORC_ORIGIN_COMPLEX.v2022.1.Hs.grp                                                             | 2.22           | 0.00         | 4.00  | 1.86         | 0.00  | 2.74         | 1.21  | 0.30 | 0.52 |
|                                               | REACTOME_SYNTHESIS_OF_DNA.v2022.1.Hs.grp                                                                                              | 1.87           | 0.00         | 2.69  | 1.95         | 0.00  | 3.06         | 1.14  | 0.34 | 0.46 |
|                                               | REACTOME_APC_C_MEDIATED_DEGRADATION_OF_CELL_CYCLE_PROTEINS.v2022.1.Hs.grp                                                             | 2.02           | 0.00         | 3.41  | 1.95         | 0.00  | 3.06         | 1.09  | 0.41 | 0.39 |
| Protein and RNA Processing                    | KEGG_RIBOSOME.v2022.1.Hs.grp                                                                                                          | 2.45           | 0.00         | 4.00  | 3.46         | 0.00  | 4.00         | 2.46  | 0.00 | 4.00 |
|                                               | REACTOME_EUKARYOTIC_TRANSLATION_ELONGATION.v2022.1.Hs.grp                                                                             | 2.53           | 0.00         | 4.00  | 3.51         | 0.00  | 4.00         | 2.47  | 0.00 | 4.00 |
|                                               | REACTOME_SRP_DEPENDENT_COTRANSLATIONAL_PROTEIN_TARGETING_TO_MEMBRANE.v2022.1.Hs.grp                                                   | 2.50           | 0.00         | 4.00  | 3.46         | 0.00  | 4.00         | 2.37  | 0.00 | 4.00 |
|                                               | REACTOME_RESPONSE_OF_EIF2AK4_GCN2_TO_AMINO_ACID_DEFICIENCY.v2022.1.Hs.grp                                                             | 2.32           | 0.00         | 4.00  | 3.45         | 0.00  | 4.00         | 2.44  | 0.00 | 4.00 |
|                                               | REACTOME_EUKARYOTIC_TRANSLATION_INITIATION.v2022.1.Hs.grp                                                                             | 2.27           | 0.00         | 4.00  | 3.46         | 0.00  | 4.00         | 2.44  | 0.00 | 4.00 |
|                                               | REACTOME_INFLUENZA_INFECTION.v2022.1.Hs.grp                                                                                           | 2.00           | 0.00         | 3.24  | 3.42         | 0.00  | 4.00         | 2.20  | 0.00 | 4.00 |
|                                               | GOBP_CYTOPLASMIC_TRANSLATION.v2022.1.Hs.grp                                                                                           | 2.16           | 0.00         | 4.00  | 3.36         | 0.00  | 4.00         | 2.43  | 0.00 | 4.00 |
|                                               | REACTOME_TRANSLATION.v2022.1.Hs.grp                                                                                                   | 2.06           | 0.00         | 4.19  | 3.47         | 0.00  | 4.00         | 2.29  | 0.00 | 4.00 |
|                                               | REACTOME_SELENOAMINO_ACID_METABOLISM.v2022.1.Hs.grp                                                                                   | 2.37           | 0.00         | 4.00  | 3.48         | 0.00  | 4.00         | 2.38  | 0.00 | 4.00 |
|                                               | REACTOME_CELLULAR_RESPONSE_TO_STARVATION.v2022.1.Hs.grp                                                                               | 2.31           | 0.00         | 4.00  | 3.38         | 0.00  | 4.00         | 2.38  | 0.00 | 4.00 |
|                                               | REACTOME_METABOLISM_OF_AMINO_ACIDS_AND_DERIVATIVES.v2022.1.Hs.grp                                                                     | 2.13           | 0.00         | 4.00  | 3.29         | 0.00  | 4.00         | 1.88  | 0.00 | 3.25 |
|                                               | REACTOME_NONSENSE_MEDIATED_DECAY_NMD.v2022.1.Hs.grp                                                                                   | 2.21           | 0.00         | 4.00  | 3.47         | 0.00  | 4.00         | 2.35  | 0.00 | 4.00 |
|                                               | REACTOME_RRNA_PROCESSING.v2022.1.Hs.grp                                                                                               | 2.18           | 0.00         | 4.00  | 3.41         | 0.00  | 4.00         | 2.37  | 0.00 | 4.00 |
| Oxidative Phosphorylation                     | GOBP_AEROBIC_RESPIRATION.v2022.1.Hs.grp                                                                                               | -1.23          | 0.21         | 0.67  | 1.94         | 0.00  | 3.03         | 1.14  | 0.35 | 0.46 |
|                                               | GOBP_OXIDATIVE_PHOSPHORYLATION.v2022.1.Hs.grp                                                                                         | -1.13          | 0.32         | 0.49  | 2.05         | 0.00  | 3.80         | 1.25  | 0.27 | 0.58 |
|                                               | GOBP_ATP_SYNTHESIS_COUPLED_ELECTRON_TRANSPORT.v2022.1.Hs.grp                                                                          | -1.20          | 0.24         | 0.61  | 2.04         | 0.00  | 3.71         | 1.08  | 0.42 | 0.37 |
|                                               | GOBP_RESPIRATORY_ELECTRON_TRANSPORT_CHAIN.v2022.1.Hs.grp                                                                              | -1.09          | 0.36         | 0.44  | 2.00         | 0.00  | 3.42         | 1.18  | 0.33 | 0.48 |
|                                               | REACTOME_RESPIRATORY_ELECTRON_TRANSPORT_ATP_SYNTHESIS_BY_CHEMOSMOTIC_COUPLING_AND_HEAT_PRODUCED_BY_UNCOUPLING_PROTEINS.v2022.1.Hs.grp | -1.34          | 0.13         | 0.90  | 2.14         | 0.00  | 4.10         | 1.31  | 0.20 | 0.70 |
|                                               | GOBP_ATP_BIOSYNTHETIC_PROCESS.v2022.1.Hs.grp                                                                                          | -1.22          | 0.22         | 0.66  | 1.87         | 0.00  | 2.74         | 1.04  | 0.48 | 0.32 |
|                                               | REACTOME_THE_CITRIC_ACID_TCA_CYCLE_AND_RESPIRATORY_ELECTRON_TRANSPORT.v2022.1.Hs.grp                                                  | -1.36          | 0.12         | 0.93  | 2.04         | 0.00  | 3.81         | 1.16  | 0.34 | 0.47 |
|                                               | GOBP_ELECTRON_TRANSPORT_CHAIN.v2022.1.Hs.grp                                                                                          | -1.10          | 0.36         | 0.44  | 1.54         | 0.03  | 1.54         | 1.17  | 0.34 | 0.46 |
|                                               | REACTOME_RESPIRATORY_ELECTRON_TRANSPORT.v2022.1.Hs.grp                                                                                | -1.22          | 0.22         | 0.66  | 1.99         | 0.00  | 3.34         | 1.16  | 0.33 | 0.48 |
|                                               | KEGG_OXIDATIVE_PHOSPHORYLATION.v2022.1.Hs.grp                                                                                         | -1.40          | 0.09         | 1.05  | 2.18         | 0.00  | 4.00         | 1.18  | 0.33 | 0.48 |
|                                               | REACTOME_COMPLEX_I_BIOGENESIS.v2022.1.Hs.grp                                                                                          | -0.99          | 0.51         | 0.29  | 1.62         | 0.02  | 1.82         | 0.96  | 0.59 | 0.23 |
| Myeloid Migration                             | GOBP_NEUTROPHIL_MIGRATION.v2022.1.Hs.grp                                                                                              | -2.04          | 0.00         | 3.50  | -1.70        | 0.02  | 1.73         | -2.20 | 0.00 | 4.00 |
|                                               | GOBP_MYELOID_LEUKOCYTE_MIGRATION.v2022.1.Hs.grp                                                                                       | -2.02          | 0.00         | 3.64  | -1.75        | 0.01  | 1.93         | -2.08 | 0.00 | 3.48 |
|                                               | GOBP_NEUTROPHIL_CHEMOTAXIS.v2022.1.Hs.grp                                                                                             | -2.02          | 0.00         | 3.75  | -1.59        | 0.04  | 1.46         | -2.10 | 0.00 | 3.43 |
|                                               | GOBP_GRANULOCYTE_MIGRATION.v2022.1.Hs.grp                                                                                             | -2.11          | 0.00         | 3.59  | -1.86        | 0.01  | 2.10         | -2.07 | 0.00 | 3.52 |
|                                               | GOBP_LEUKOCYTE_CHEMOTAXIS.v2022.1.Hs.grp                                                                                              | -2.02          | 0.00         | 3.70  | -1.90        | 0.01  | 2.26         | -1.87 | 0.00 | 2.61 |
|                                               | GOBP_GRANULOCYTE_CHEMOTAXIS.v2022.1.Hs.grp                                                                                            | -2.09          | 0.00         | 3.72  | -1.66        | 0.02  | 1.62         | -2.02 | 0.00 | 3.44 |
|                                               | GOBP_CELL_CHEMOTAXIS.v2022.1.Hs.grp                                                                                                   | -2.02          | 0.00         | 3.80  | -2.09        | 0.00  | 3.02         | -1.94 | 0.00 | 3.05 |
|                                               | GOBP_LEUKOCYTE_MIGRATION.v2022.1.Hs.grp                                                                                               | -2.01          | 0.00         | 3.84  | -2.04        | 0.00  | 2.77         | -1.98 | 0.00 | 3.34 |
|                                               | GOBP_TAXIS.v2022.1.Hs.grp                                                                                                             | -1.98          | 0.00         | 3.76  | -2.04        | 0.00  | 2.74         | -1.77 | 0.01 | 2.24 |
| Myeloid Activation                            | GOBP_GRANULOCYTE_ACTIVATION.v2022.1.Hs.grp                                                                                            | -1.60          | 0.02         | 1.71  | -1.64        | 0.03  | 1.60         | -1.99 | 0.00 | 3.33 |
|                                               | GOBP_POSITIVE_REGULATION_OF_MYELOID_CELL_DIFFERENTIATION.v2022.1.Hs.grp                                                               | -1.65          | 0.02         | 1.80  | -2.07        | 0.00  | 2.88         | -2.16 | 0.00 | 3.73 |
|                                               | GOBP_REGULATION_OF_MYELOID_LEUKOCYTE_MEDIATED_IMMUNITY.v2022.1.Hs.grp                                                                 | -1.26          | 0.19         | 0.71  | -1.34        | 0.13  | 0.90         | -2.04 | 0.00 | 3.54 |
|                                               | GOBP_LEUKOCYTE_MEDIATED_CYTOTOXICITY.v2022.1.Hs.grp                                                                                   | -1.09          | 0.36         | 0.44  | -1.25        | 0.19  | 0.73         | -1.57 | 0.03 | 1.55 |
|                                               | GOBP_FC_RECEPTOR_SIGNALING_PATHWAY.v2022.1.Hs.grp                                                                                     | -1.43          | 0.08         | 1.12  | -1.34        | 0.13  | 0.90         |       |      |      |
|                                               | GOBP_REGULATION_OF_LEUKOCYTE_MEDIATED_CYTOTOXICITY.v2022.1.Hs.grp                                                                     | -0.93          | 0.62         | 0.21  | -1.18        | 0.24  | 0.61         | -1.84 | 0.00 | 2.54 |
| Inflammation                                  | GOBP_RESPONSE_TO_CHEMOKINE.v2022.1.Hs.grp                                                                                             | -2.00          | 0.00         | 3.73  | -1.86        | 0.01  | 2.11         | -1.85 | 0.00 | 2.58 |
|                                               | KEGG_CYTOKINE_CYTOKINE_RECEPTOR_INTERACTION.v2022.1.Hs.grp                                                                            | -1.96          | 0.00         | 3.85  | -1.85        | 0.01  | 2.13         | -2.34 | 0.00 | 4.00 |
|                                               | HALLMARK_IL6_JAK_STAT3_SIGNALING.v2022.1.Hs.grp                                                                                       | -2.01          | 0.00         | 3.88  | -1.98        | 0.00  | 2.58         | -2.16 | 0.00 | 3.76 |
|                                               | GOBP_NEGATIVE_REGULATION_OF_VIRAL_GENOME_REPLICATION.v2022.1.Hs.grp                                                                   | -1.10          | 0.36         | 0.44  | -1.00        | 0.49  | 0.31         | -1.74 | 0.01 | 2.14 |
|                                               | GOBP_TUMOR_NECROSIS_FACTOR_SUPERFAMILY_CYTOKINE_PRODUCTION.v2022.1.Hs.grp                                                             | -1.22          | 0.23         | 0.65  | -1.23        | 0.20  | 0.69         | -2.37 | 0.00 | 4.00 |
|                                               | GOBP_TUMOR_NECROSIS_FACTOR_SUPERFAMILY_CYTOKINE_PRODUCTION.v2022.1.Hs.grp                                                             | -1.35          | 0.12         | 0.92  | -1.20        | 0.23  | 0.64         | -2.08 | 0.00 | 3.50 |
|                                               | HALLMARK_TNFA_SIGNALING_VIA_NFKB.v2022.1.Hs.grp                                                                                       | -2.43          | 0.00         | 4.00  | -3.00        | 0.00  | 4.00         | -1.93 | 0.00 | 3.05 |
|                                               | REACTOME_INTERFERON_ALPHA_BETA_SIGNALING.v2022.1.Hs.grp                                                                               | -1.00          | 0.50         | 0.30  | 0.99         | 0.50  | 0.30         | -2.38 | 0.00 | 4.00 |
|                                               | HALLMARK_INTERFERON_ALPHA_RESPONSE.v2022.1.Hs.grp                                                                                     | -1.17          | 0.27         | 0.57  | 1.05         | 0.40  | 0.40         | -2.66 | 0.00 | 4.00 |
|                                               | HALLMARK_INTERFERON_GAMMA_RESPONSE.v2022.1.Hs.grp                                                                                     | -1.44          | 0.07         | 1.14  | -1.52        | 0.05  | 1.30         | -2.39 | 0.00 | 4.00 |
|                                               | GOBP_ACUTE_INFLAMMATORY_RESPONSE.v2022.1.Hs.grp                                                                                       | -1.41          | 0.09         | 1.07  | -1.91        | 0.01  | 2.24         | -2.10 | 0.00 | 3.49 |
|                                               | HALLMARK_ALLOGRAFT_REJECTION.v2022.1.Hs.grp                                                                                           | -1.61          | 0.02         | 1.70  | -1.39        | 0.10  | 1.00         | -1.43 | 0.06 | 1.20 |
| HALLMARK_INFLAMMATORY_RESPONSE.v2022.1.Hs.grp | -2.12                                                                                                                                 | 0.00           | 3.42         | -2.32 | 0.00         | 4.00  | -2.23        | 0.00  | 4.00 |      |

**Supplemental Table 5 Continued: GSEA on scRNAseq Populations, related to Figure 6**  
**NES=Normalized Enrichment Score, FDR=False Discovery Rate**

| Group                      | MSigDB Signature Name                                                                                                                  | aPD1 vs Placebo |              |      |              |       |              |       |      |      |
|----------------------------|----------------------------------------------------------------------------------------------------------------------------------------|-----------------|--------------|------|--------------|-------|--------------|-------|------|------|
|                            |                                                                                                                                        | Macs/Dend       |              | Neus |              | Tumor |              |       |      |      |
|                            |                                                                                                                                        | NES             | FDR q-Log(q) | NES  | FDR q-Log(q) | NES   | FDR q-Log(q) |       |      |      |
| DNA Replication and Damage | REACTOME_G1_S_DNA_DAMAGE_CHECKPOINTS.v2022.1.Hs.grp                                                                                    | 2.15            | 0.00         | 4.00 | 1.81         | 0.00  | 2.45         | 0.83  | 0.81 | 0.09 |
|                            | REACTOME_ORC1_REMOVAL_FROM_CHROMATIN.v2022.1.Hs.grp                                                                                    | 2.32            | 0.00         | 4.00 | 1.73         | 0.01  | 2.06         | 0.80  | 0.84 | 0.07 |
|                            | REACTOME_SWITCHING_OF_ORIGINS_TO_A_POST_REPLICATIVE_STATE.v2022.1.Hs.grp                                                               | 2.24            | 0.00         | 4.00 | 1.65         | 0.02  | 1.81         | 0.75  | 0.88 | 0.05 |
|                            | REACTOME_CDT1_ASSOCIATION_WITH_THE_CDC6_ORC_ORIGIN_COMPLEX.v2022.1.Hs.grp                                                              | 2.39            | 0.00         | 4.00 | 1.70         | 0.01  | 1.96         | 0.94  | 0.65 | 0.18 |
|                            | REACTOME_SYNTHESIS_OF_DNA.v2022.1.Hs.grp                                                                                               | 2.16            | 0.00         | 4.00 | 1.63         | 0.02  | 1.74         | 0.79  | 0.86 | 0.07 |
|                            | REACTOME_APC_C_MEDIATED_DEGRADATION_OF_CELL_CYCLE_PROTEINS.v2022.1.Hs.grp                                                              | 2.33            | 0.00         | 4.00 | 1.66         | 0.01  | 1.83         | 0.84  | 0.80 | 0.10 |
| Protein and RNA Processing | KEGG_RIBOSOME.v2022.1.Hs.grp                                                                                                           | 3.25            | 0.00         | 4.00 | 3.40         | 0.00  | 4.00         | 2.48  | 0.00 | 4.00 |
|                            | REACTOME_EUKARYOTIC_TRANSLATION_ELONGATION.v2022.1.Hs.grp                                                                              | 3.17            | 0.00         | 4.00 | 3.35         | 0.00  | 4.00         | 2.50  | 0.00 | 4.00 |
|                            | REACTOME_SRP_DEPENDENT_COTRANSLATIONAL_PROTEIN_TARGETING_TO_MEMBRANE.v2022.1.Hs.grp                                                    | 3.04            | 0.00         | 4.00 | 3.33         | 0.00  | 4.00         | 2.46  | 0.00 | 4.00 |
|                            | REACTOME_RESPONSE_OF_EIF2AK4_GCN2_TO_AMINO_ACID_DEFICIENCY.v2022.1.Hs.grp                                                              | 3.00            | 0.00         | 4.00 | 3.28         | 0.00  | 4.00         | 2.22  | 0.00 | 4.00 |
|                            | REACTOME_EUKARYOTIC_TRANSLATION_INITIATION.v2022.1.Hs.grp                                                                              | 2.91            | 0.00         | 4.00 | 3.37         | 0.00  | 4.00         | 2.41  | 0.00 | 4.00 |
|                            | REACTOME_INFLUENZA_INFECTION.v2022.1.Hs.grp                                                                                            | 2.63            | 0.00         | 4.00 | 3.27         | 0.00  | 4.00         | 2.34  | 0.00 | 4.00 |
|                            | GOBP_CYTOPLASMIC_TRANSLATION.v2022.1.Hs.grp                                                                                            | 2.67            | 0.00         | 4.00 | 3.32         | 0.00  | 4.00         | 2.39  | 0.00 | 4.00 |
|                            | REACTOME_TRANSLATION.v2022.1.Hs.grp                                                                                                    | 2.54            | 0.00         | 4.00 | 3.23         | 0.00  | 4.00         | 2.29  | 0.00 | 4.00 |
|                            | REACTOME_SELENOAMINO_ACID_METABOLISM.v2022.1.Hs.grp                                                                                    | 3.05            | 0.00         | 4.00 | 3.35         | 0.00  | 4.00         | 2.41  | 0.00 | 4.00 |
|                            | REACTOME_CELLULAR_RESPONSE_TO_STARVATION.v2022.1.Hs.grp                                                                                | 2.85            | 0.00         | 4.00 | 3.25         | 0.00  | 4.00         | 2.17  | 0.00 | 4.00 |
|                            | REACTOME_METABOLISM_OF_AMINO_ACIDS_AND_DERIVATIVES.v2022.1.Hs.grp                                                                      | 2.58            | 0.00         | 4.00 | 3.16         | 0.00  | 4.00         | 2.00  | 0.00 | 4.00 |
|                            | REACTOME_NONSENSE_MEDIATED_DECAY_NMD.v2022.1.Hs.grp                                                                                    | 2.90            | 0.00         | 4.00 | 3.38         | 0.00  | 4.00         | 2.42  | 0.00 | 4.00 |
|                            | REACTOME_RRNA_PROCESSING.v2022.1.Hs.grp                                                                                                | 2.62            | 0.00         | 4.00 | 3.29         | 0.00  | 4.00         | 2.38  | 0.00 | 4.00 |
| Oxidative Phosphorylation  | GOBP_AEROBIC_RESPIRATION.v2022.1.Hs.grp                                                                                                | -1.04           | 0.47         | 0.33 | 0.98         | 0.58  | 0.24         | 1.64  | 0.01 | 1.96 |
|                            | GOBP_OXIDATIVE_PHOSPHORYLATION.v2022.1.Hs.grp                                                                                          | -1.05           | 0.45         | 0.34 | 0.96         | 0.61  | 0.21         | 1.71  | 0.00 | 2.32 |
|                            | GOBP_ATP_SYNTHESIS_COUPLED_ELECTRON_TRANSPORT.v2022.1.Hs.grp                                                                           | -1.14           | 0.32         | 0.49 | 0.87         | 0.75  | 0.12         | 1.62  | 0.01 | 1.89 |
|                            | GOBP_RESPIRATORY_ELECTRON_TRANSPORT_CHAIN.v2022.1.Hs.grp                                                                               | -1.15           | 0.32         | 0.50 | 1.03         | 0.50  | 0.30         | 1.61  | 0.01 | 1.85 |
|                            | REACTOME_RESPIRATORY_ELECTRON_TRANSPORT_ATP_SYNTHESIS_BY_CHEMIOSMOTIC_COUPLING_AND_HEAT_PRODUCED_BY_UNCOUPLING_PROTEINS.v2022.1.Hs.grp | -1.11           | 0.36         | 0.44 | 0.93         | 0.66  | 0.18         | 1.77  | 0.00 | 2.64 |
|                            | GOBP_ATP_BIOSYNTHETIC_PROCESS.v2022.1.Hs.grp                                                                                           | -0.98           | 0.55         | 0.26 | 1.12         | 0.38  | 0.42         | 1.73  | 0.00 | 2.44 |
|                            | REACTOME_THE_CITRIC_ACID_TCA_CYCLE_AND_RESPIRATORY_ELECTRON_TRANSPORT.v2022.1.Hs.grp                                                   | -1.19           | 0.27         | 0.57 | 1.08         | 0.43  | 0.36         | 1.69  | 0.01 | 2.18 |
|                            | GOBP_ELECTRON_TRANSPORT_CHAIN.v2022.1.Hs.grp                                                                                           | -1.17           | 0.29         | 0.54 | 0.74         | 0.93  | 0.03         | 1.57  | 0.02 | 1.64 |
|                            | REACTOME_RESPIRATORY_ELECTRON_TRANSPORT.v2022.1.Hs.grp                                                                                 | -1.14           | 0.32         | 0.50 | 0.75         | 0.92  | 0.04         | 1.65  | 0.01 | 1.97 |
|                            | KEGG_OXIDATIVE_PHOSPHORYLATION.v2022.1.Hs.grp                                                                                          | -1.26           | 0.19         | 0.72 | 1.39         | 0.09  | 1.03         | 1.75  | 0.00 | 2.56 |
|                            | REACTOME_COMPLEX_I_BIOGENESIS.v2022.1.Hs.grp                                                                                           | -1.04           | 0.46         | 0.34 | 0.64         | 0.98  | 0.01         | 1.38  | 0.10 | 1.00 |
| Myeloid Migration          | GOBP_NEUTROPHIL_MIGRATION.v2022.1.Hs.grp                                                                                               | -2.07           | 0.00         | 4.00 | -1.38        | 0.13  | 0.89         | -2.21 | 0.00 | 4.00 |
|                            | GOBP_MYELOID_LEUKOCYTE_MIGRATION.v2022.1.Hs.grp                                                                                        | -2.11           | 0.00         | 4.00 | -1.61        | 0.05  | 1.28         | -1.91 | 0.00 | 2.81 |
|                            | GOBP_NEUTROPHIL_CHEMOTAXIS.v2022.1.Hs.grp                                                                                              | -2.06           | 0.00         | 4.00 | -1.45        | 0.10  | 1.00         | -2.14 | 0.00 | 4.00 |
|                            | GOBP_GRANULOCYTE_MIGRATION.v2022.1.Hs.grp                                                                                              | -2.16           | 0.00         | 4.00 | -1.62        | 0.05  | 1.27         | -2.08 | 0.00 | 3.99 |
|                            | GOBP_LEUKOCYTE_CHEMOTAXIS.v2022.1.Hs.grp                                                                                               | -1.95           | 0.00         | 3.67 | -1.86        | 0.01  | 1.85         | -1.98 | 0.00 | 3.28 |
|                            | GOBP_GRANULOCYTE_CHEMOTAXIS.v2022.1.Hs.grp                                                                                             | -2.15           | 0.00         | 4.00 | -1.73        | 0.03  | 1.55         | -2.01 | 0.00 | 3.44 |
|                            | GOBP_CELL_CHEMOTAXIS.v2022.1.Hs.grp                                                                                                    | -1.91           | 0.00         | 3.35 | -2.09        | 0.00  | 2.62         | -1.83 | 0.00 | 2.51 |
|                            | GOBP_LEUKOCYTE_MIGRATION.v2022.1.Hs.grp                                                                                                | -1.97           | 0.00         | 3.86 | -1.91        | 0.01  | 1.99         | -1.81 | 0.00 | 2.38 |
|                            | GOBP_TAXIS.v2022.1.Hs.grp                                                                                                              | -1.87           | 0.00         | 3.06 | -1.96        | 0.01  | 2.07         | -1.75 | 0.01 | 2.18 |
| Myeloid Activation         | GOBP_GRANULOCYTE_ACTIVATION.v2022.1.Hs.grp                                                                                             | -1.56           | 0.03         | 1.55 | -1.50        | 0.09  | 1.06         | -1.51 | 0.04 | 1.39 |
|                            | GOBP_POSITIVE_REGULATION_OF_MYELOID_CELL_DIFFERENTIATION.v2022.1.Hs.grp                                                                | -1.67           | 0.01         | 2.02 | -2.28        | 0.00  | 3.23         | -1.78 | 0.00 | 2.31 |
|                            | GOBP_REGULATION_OF_MYELOID_LEUKOCYTE_MEDIATED_IMMUNITY.v2022.1.Hs.grp                                                                  | -0.87           | 0.72         | 0.15 | 0.69         | 0.96  | 0.02         | -1.87 | 0.00 | 2.65 |
|                            | GOBP_LEUKOCYTE_MEDIATED_CYTOTOXICITY.v2022.1.Hs.grp                                                                                    | -0.84           | 0.75         | 0.13 | -1.13        | 0.32  | 0.49         | -1.68 | 0.01 | 1.92 |
|                            | GOBP_FC_RECEPTOR_SIGNALING_PATHWAY.v2022.1.Hs.grp                                                                                      | -0.95           | 0.60         | 0.22 |              |       |              | -1.27 | 0.15 | 0.83 |
|                            | GOBP_REGULATION_OF_LEUKOCYTE_MEDIATED_CYTOTOXICITY.v2022.1.Hs.grp                                                                      | 1.01            | 0.42         | 0.38 | -1.17        | 0.30  | 0.52         | -1.87 | 0.00 | 2.66 |
| Inflammation               | GOBP_RESPONSE_TO_CHEMOKINE.v2022.1.Hs.grp                                                                                              | -2.07           | 0.00         | 4.00 | -1.68        | 0.03  | 1.46         | -1.80 | 0.00 | 2.31 |
|                            | KEGG_CYTOKINE_CYTOKINE_RECEPTOR_INTERACTION.v2022.1.Hs.grp                                                                             | -1.80           | 0.00         | 2.60 | -1.69        | 0.03  | 1.48         | -2.23 | 0.00 | 4.00 |
|                            | HALLMARK_IL6_JAK_STAT3_SIGNALING.v2022.1.Hs.grp                                                                                        | -1.72           | 0.01         | 2.23 | -1.56        | 0.06  | 1.19         | -1.91 | 0.00 | 2.80 |
|                            |                                                                                                                                        | -1.15           | 0.30         | 0.52 | 0.73         | 0.93  | 0.03         | -1.34 | 0.10 | 1.00 |
|                            | GOBP_NEGATIVE_REGULATION_OF_VIRAL_GENOME_REPLICATION.v2022.1.Hs.grp                                                                    | -1.48           | 0.06         | 1.24 | -1.60        | 0.05  | 1.28         | -2.10 | 0.00 | 4.00 |
|                            | GOBP_TUMOR_NECROSIS_FACTOR_SUPERFAMILY_CYTOKINE_PRODUCTION.v2022.1.Hs.grp                                                              | -1.41           | 0.08         | 1.07 | -1.08        | 0.38  | 0.42         | -1.48 | 0.05 | 1.32 |
|                            | HALLMARK_TNFA_SIGNALING_VIA_NFKB.v2022.1.Hs.grp                                                                                        | -2.32           | 0.00         | 4.00 | -2.33        | 0.00  | 2.93         | -1.87 | 0.00 | 2.63 |
|                            | REACTOME_INTERFERON_ALPHA_BETA_SIGNALING.v2022.1.Hs.grp                                                                                | -1.29           | 0.16         | 0.79 | -1.79        | 0.02  | 1.70         | -2.28 | 0.00 | 4.00 |
|                            | HALLMARK_INTERFERON_ALPHA_RESPONSE.v2022.1.Hs.grp                                                                                      | -1.39           | 0.09         | 1.04 | -1.15        | 0.32  | 0.49         | -2.46 | 0.00 | 4.00 |
|                            | HALLMARK_INTERFERON_GAMMA_RESPONSE.v2022.1.Hs.grp                                                                                      | -1.43           | 0.08         | 1.12 | -1.04        | 0.41  | 0.38         | -2.18 | 0.00 | 4.00 |
|                            | GOBP_ACUTE_INFLAMMATORY_RESPONSE.v2022.1.Hs.grp                                                                                        | -1.37           | 0.11         | 0.98 | -1.90        | 0.01  | 2.01         | -1.77 | 0.01 | 2.24 |
|                            | HALLMARK_ALLOGRAFT_REJECTION.v2022.1.Hs.grp                                                                                            | -1.40           | 0.09         | 1.06 | -1.13        | 0.32  | 0.49         | -1.62 | 0.02 | 1.75 |
|                            | HALLMARK_INFLAMMATORY_RESPONSE.v2022.1.Hs.grp                                                                                          | -2.14           | 0.00         | 4.00 | -1.61        | 0.05  | 1.29         | -1.88 | 0.00 | 2.65 |

**Supplemental Table 6: Genes Highly Expressed in Neutrophil Clusters, Related to Figure 6**  
**Log2FC=Log2-fold change between cluster and all others, pct=percentage of cells expressing**

| Gene     |              |        |       |         |          |             | Gene    |          |        |          |          |          |             |
|----------|--------------|--------|-------|---------|----------|-------------|---------|----------|--------|----------|----------|----------|-------------|
| Cluster  | Symbol       | Log2FC | pct.1 | pct.2   | P value  | Adj P value | Cluster | Symbol   | Log2FC | pct.1    | pct.2    | P value  | Adj P value |
| Neu-1    | Cst3         | 2.050  | 0.929 | 0.784   | 0.0E+00  | 0.0E+00     | Neu-3   | Gadd45b  | 2.421  | 0.877    | 0.664    | 0.0E+00  | 0.0E+00     |
|          | Gngt2        | 1.920  | 0.812 | 0.557   | 0.0E+00  | 0.0E+00     |         | Nceh1    | 2.367  | 0.856    | 0.760    | 0.0E+00  | 0.0E+00     |
|          | Hexb         | 1.393  | 0.794 | 0.754   | 0.0E+00  | 0.0E+00     |         | Gpnmb    | 2.274  | 0.781    | 0.565    | 0.0E+00  | 0.0E+00     |
|          | Gpx1         | 1.277  | 0.869 | 0.823   | 0.0E+00  | 0.0E+00     |         | Psap     | 2.244  | 0.852    | 0.718    | 0.0E+00  | 0.0E+00     |
|          | Ptgs1        | 1.126  | 0.772 | 0.702   | 0.0E+00  | 0.0E+00     |         | Ifrd1    | 2.039  | 0.819    | 0.707    | 0.0E+00  | 0.0E+00     |
|          | Ms4a6d       | 0.881  | 0.805 | 0.780   | 0.0E+00  | 0.0E+00     |         | Hilpda   | 2.038  | 0.836    | 0.799    | 0.0E+00  | 0.0E+00     |
|          | Gm19951      | 0.635  | 0.840 | 0.837   | 0.0E+00  | 0.0E+00     |         | Ccl3     | 1.982  | 0.920    | 0.759    | 0.0E+00  | 0.0E+00     |
|          | Cenpx        | 0.430  | 0.745 | 0.593   | 0.0E+00  | 0.0E+00     |         | Atp6v1c1 | 1.914  | 0.857    | 0.766    | 0.0E+00  | 0.0E+00     |
|          | Hist1h4d     | 0.351  | 0.793 | 0.747   | 0.0E+00  | 0.0E+00     |         | Lamp1    | 1.832  | 0.885    | 0.784    | 0.0E+00  | 0.0E+00     |
|          | Ranbp1       | 0.333  | 0.704 | 0.546   | 0.0E+00  | 0.0E+00     |         | Hcar2    | 1.829  | 0.884    | 0.824    | 0.0E+00  | 0.0E+00     |
|          | Card11       | 0.298  | 0.831 | 0.810   | 0.0E+00  | 0.0E+00     |         | Ctsb     | 1.789  | 0.977    | 0.916    | 0.0E+00  | 0.0E+00     |
|          | Hist1h1d     | 0.297  | 0.697 | 0.506   | 0.0E+00  | 0.0E+00     |         | Cd63     | 1.786  | 0.936    | 0.864    | 0.0E+00  | 0.0E+00     |
|          | Dmkn         | 0.263  | 0.794 | 0.646   | 0.0E+00  | 0.0E+00     |         | Zeb2     | 1.742  | 0.829    | 0.553    | 0.0E+00  | 0.0E+00     |
|          | Cpt1a        | 0.256  | 0.724 | 0.482   | 0.0E+00  | 0.0E+00     |         | Ctsz     | 1.678  | 0.936    | 0.850    | 0.0E+00  | 0.0E+00     |
|          | H1f0         | 0.809  | 0.700 | 0.554   | 4.0E-279 | 5.9E-276    |         | Ftl1     | 1.590  | 1.000    | 0.999    | 0.0E+00  | 0.0E+00     |
|          | Laptm5       | 0.807  | 0.829 | 0.784   | 8.0E-255 | 1.2E-251    |         | F10      | 1.513  | 0.863    | 0.864    | 0.0E+00  | 0.0E+00     |
|          | Asah1        | 0.427  | 0.666 | 0.444   | 2.5E-208 | 3.7E-205    |         | Gas2l3   | 1.194  | 0.818    | 0.737    | 0.0E+00  | 0.0E+00     |
|          | Atp1a1       | 1.115  | 0.779 | 0.714   | 3.2E-204 | 4.8E-201    |         | Dock10   | 1.193  | 0.783    | 0.789    | 0.0E+00  | 0.0E+00     |
|          | Pmaip1       | 0.631  | 0.787 | 0.697   | 2.3E-202 | 3.5E-199    |         | Lhfp12   | 1.059  | 0.784    | 0.606    | 0.0E+00  | 0.0E+00     |
|          | Hist1h1e     | 0.525  | 0.794 | 0.723   | 2.0E-201 | 2.9E-198    |         | P2rx7    | 0.743  | 0.760    | 0.628    | 0.0E+00  | 0.0E+00     |
|          | Atp5g1       | 0.535  | 0.667 | 0.503   | 3.9E-197 | 5.8E-194    |         | Pdxk     | 0.707  | 0.726    | 0.490    | 0.0E+00  | 0.0E+00     |
|          | Ltc4s        | 0.855  | 0.644 | 0.562   | 2.4E-193 | 3.5E-190    |         | Gstm1    | 0.948  | 0.697    | 0.537    | 5.0E-285 | 7.5E-282    |
|          | Ptma         | 1.199  | 0.760 | 0.667   | 4.4E-184 | 6.5E-181    |         | Tst      | 0.523  | 0.688    | 0.501    | 9.7E-282 | 1.5E-278    |
|          | Reep5        | 0.947  | 0.749 | 0.636   | 1.4E-175 | 2.1E-172    |         | Hexa     | 1.286  | 0.839    | 0.735    | 4.4E-268 | 6.5E-265    |
|          | Fam96a       | 0.381  | 0.589 | 0.440   | 2.4E-164 | 3.7E-161    |         | Atp6v0d2 | 0.978  | 0.752    | 0.684    | 3.5E-267 | 5.3E-264    |
|          | Cd81         | 0.475  | 0.278 | 0.442   | 2.2E-155 | 3.3E-152    |         | Dhfr     | 0.859  | 0.789    | 0.859    | 3.2E-265 | 4.7E-262    |
|          | Rps2         | 0.817  | 0.873 | 0.819   | 8.0E-152 | 1.2E-148    |         | Chka     | 0.492  | 0.738    | 0.529    | 2.2E-261 | 3.2E-258    |
|          | Chil3        | 1.278  | 0.842 | 0.760   | 4.3E-130 | 6.4E-127    |         | Plcx2    | 0.704  | 0.728    | 0.788    | 1.7E-250 | 2.5E-247    |
|          | Agap1        | 0.711  | 0.586 | 0.439   | 4.9E-117 | 7.3E-114    |         | Fcgr2b   | 0.662  | 0.838    | 0.714    | 5.9E-241 | 8.8E-238    |
|          | Cd302        | 0.256  | 0.296 | 0.474   | 2.5E-116 | 3.8E-113    |         | Gns      | 1.455  | 0.782    | 0.705    | 7.0E-240 | 1.1E-236    |
|          | Cd300c2      | 0.778  | 0.716 | 0.616   | 2.5E-111 | 3.8E-108    |         | Ctsd     | 0.702  | 0.987    | 0.976    | 1.2E-220 | 1.8E-217    |
|          | Lrp1         | 0.630  | 0.529 | 0.374   | 2.7E-108 | 4.0E-105    |         | Atf3     | 1.518  | 0.679    | 0.486    | 1.4E-214 | 2.2E-211    |
|          | Krt19        | 0.266  | 0.659 | 0.814   | 1.1E-103 | 1.7E-100    |         | Npc1     | 1.184  | 0.749    | 0.753    | 6.1E-211 | 9.1E-208    |
|          | Hebp1        | 0.441  | 0.646 | 0.524   | 5.1E-103 | 7.6E-100    |         | Aprt     | 1.030  | 0.820    | 0.695    | 1.5E-210 | 2.3E-207    |
|          | Ccnd2        | 0.297  | 0.487 | 0.674   | 3.5E-88  | 5.2E-85     |         | Cd68     | 1.480  | 0.714    | 0.531    | 1.7E-208 | 2.6E-205    |
|          | Ssbp4        | 0.336  | 0.596 | 0.543   | 6.5E-87  | 9.8E-84     |         | Canx     | 0.895  | 0.769    | 0.640    | 1.5E-207 | 2.3E-204    |
|          | Tcf4         | 0.262  | 0.442 | 0.288   | 1.4E-86  | 2.1E-83     |         | Cd274    | 1.443  | 0.725    | 0.671    | 2.9E-205 | 4.3E-202    |
|          | Dpep2        | 0.452  | 0.652 | 0.764   | 1.9E-86  | 2.8E-83     |         | Plekhm2  | 1.059  | 0.785    | 0.766    | 4.3E-197 | 6.4E-194    |
|          | Grn          | 0.508  | 0.869 | 0.830   | 2.0E-84  | 2.9E-81     |         | Prdx1    | 1.174  | 0.673    | 0.462    | 6.6E-191 | 9.9E-188    |
|          | Calr         | 0.613  | 0.710 | 0.613   | 1.3E-82  | 1.9E-79     |         | Tpp1     | 1.030  | 0.716    | 0.620    | 1.2E-185 | 1.8E-182    |
|          | B930036N10Ri | 0.429  | 0.642 | 0.682   | 1.8E-82  | 2.7E-79     |         | Naglu    | 0.956  | 0.616    | 0.469    | 3.1E-165 | 4.6E-162    |
|          | Naaa         | 0.466  | 0.655 | 0.600   | 1.6E-81  | 2.4E-78     |         | H2-Eb1   | 0.929  | 0.683    | 0.729    | 7.5E-150 | 1.1E-146    |
|          | Pgls         | 0.322  | 0.607 | 0.512   | 2.7E-81  | 4.0E-78     |         | Dhrs3    | 0.764  | 0.674    | 0.525    | 6.6E-145 | 9.9E-142    |
|          | Id2          | 0.400  | 0.925 | 0.882   | 1.7E-75  | 2.6E-72     |         | Dnmt1    | 0.341  | 0.626    | 0.526    | 3.8E-137 | 5.7E-134    |
|          | Bcl2a1b      | 0.796  | 0.640 | 0.563   | 8.2E-75  | 1.2E-71     |         | Npc2     | 1.027  | 0.875    | 0.886    | 1.8E-132 | 2.7E-129    |
| Ctsa     | 0.531        | 0.744  | 0.686 | 2.7E-68 | 4.0E-65  | Tmem86a     | 0.556   | 0.724    | 0.748  | 2.4E-128 | 3.5E-125 |          |             |
| Manf     | 0.354        | 0.814  | 0.794 | 6.8E-68 | 1.0E-64  | Gadd45g     | 1.393   | 0.634    | 0.509  | 5.6E-122 | 8.4E-119 |          |             |
| Cybb     | 0.303        | 0.519  | 0.409 | 4.6E-65 | 6.8E-62  | Id2         | 0.969   | 0.874    | 0.904  | 4.8E-121 | 7.2E-118 |          |             |
| Gm26917  | 0.282        | 0.585  | 0.474 | 1.5E-61 | 2.2E-58  | Hpgds       | 0.522   | 0.680    | 0.724  | 9.2E-119 | 1.4E-115 |          |             |
| Ndufa4   | 0.667        | 0.623  | 0.564 | 1.9E-60 | 2.9E-57  | Inhba       | 0.874   | 0.622    | 0.511  | 6.6E-114 | 9.9E-111 |          |             |
| Hist1h1c | 0.752        | 0.664  | 0.572 | 3.1E-58 | 4.7E-55  | Tcirg1      | 1.016   | 0.670    | 0.594  | 1.6E-112 | 2.5E-109 |          |             |
| Bcl2a1a  | 0.768        | 0.592  | 0.516 | 3.8E-58 | 5.7E-55  | Lgmn        | 0.951   | 0.627    | 0.518  | 1.4E-111 | 2.1E-108 |          |             |
| Gm2a     | 0.892        | 0.637  | 0.616 | 1.3E-56 | 2.0E-53  | Ccnf        | 0.540   | 0.662    | 0.781  | 5.7E-109 | 8.6E-106 |          |             |
| Phlda1   | 0.268        | 0.391  | 0.530 | 1.3E-55 | 1.9E-52  | Creg1       | 1.377   | 0.702    | 0.577  | 1.2E-106 | 1.9E-103 |          |             |
| Mt1      | 0.286        | 0.750  | 0.734 | 4.5E-55 | 6.8E-52  | Myo5a       | 0.533   | 0.480    | 0.319  | 2.3E-99  | 3.5E-96  |          |             |
| Hist1h4i | 0.880        | 0.646  | 0.592 | 5.1E-54 | 7.6E-51  | Mpeg1       | 0.803   | 0.701    | 0.585  | 5.7E-99  | 8.5E-96  |          |             |

|              |          |       |       |         |          |          |                  |          |       |         |         |          |          |
|--------------|----------|-------|-------|---------|----------|----------|------------------|----------|-------|---------|---------|----------|----------|
| Nap1l1       | 0.311    | 0.514 | 0.434 | 7.4E-52 | 1.1E-48  | Ccl4     | 1.163            | 0.868    | 0.935 | 3.7E-95 | 5.6E-92 |          |          |
| Ccng1        | 0.519    | 0.520 | 0.461 | 1.5E-51 | 2.2E-48  | Syng1    | 0.793            | 0.721    | 0.791 | 7.6E-92 | 1.1E-88 |          |          |
| Unc93b1      | 0.566    | 0.570 | 0.493 | 1.8E-51 | 2.6E-48  | Aplp2    | 0.334            | 0.718    | 0.588 | 7.3E-91 | 1.1E-87 |          |          |
| Pycard       | 0.298    | 0.870 | 0.846 | 2.1E-51 | 3.1E-48  | Hmx1     | 1.205            | 0.790    | 0.778 | 9.1E-85 | 1.4E-81 |          |          |
| P2ry6        | 0.379    | 0.710 | 0.721 | 1.9E-50 | 2.9E-47  | Hspa9    | 0.589            | 0.651    | 0.663 | 2.2E-81 | 3.4E-78 |          |          |
| Tubb5        | 0.364    | 0.356 | 0.505 | 2.0E-50 | 3.0E-47  | Hspa5    | 0.742            | 0.800    | 0.740 | 2.0E-80 | 2.9E-77 |          |          |
| Tubb4b       | 0.403    | 0.662 | 0.575 | 5.7E-48 | 8.6E-45  | Dpp7     | 0.502            | 0.624    | 0.692 | 1.0E-72 | 1.5E-69 |          |          |
| Pdia6        | 0.555    | 0.775 | 0.771 | 7.2E-48 | 1.1E-44  | Hsp90b1  | 0.441            | 0.736    | 0.690 | 3.7E-72 | 5.5E-69 |          |          |
| Gm20186      | 0.390    | 0.404 | 0.535 | 4.5E-47 | 6.7E-44  | Rgs1     | 0.942            | 0.774    | 0.774 | 7.5E-70 | 1.1E-66 |          |          |
| Ucp2         | 0.715    | 0.743 | 0.739 | 8.8E-42 | 1.3E-38  | Hk2      | 0.381            | 0.466    | 0.660 | 4.3E-69 | 6.4E-66 |          |          |
| Clec12a      | 0.455    | 0.481 | 0.424 | 1.0E-39 | 1.6E-36  | Sqstm1   | 0.921            | 0.608    | 0.494 | 1.2E-67 | 1.8E-64 |          |          |
| Colgalt1     | 0.261    | 0.486 | 0.423 | 4.1E-39 | 6.1E-36  | Emp1     | 0.827            | 0.723    | 0.773 | 6.3E-65 | 9.4E-62 |          |          |
| Cks2         | 0.955    | 0.534 | 0.469 | 1.2E-36 | 1.8E-33  | Rps2     | 0.628            | 0.867    | 0.830 | 3.3E-63 | 4.9E-60 |          |          |
| Rpn1         | 0.256    | 0.347 | 0.457 | 3.6E-31 | 5.3E-28  | Hspa1b   | 0.866            | 0.659    | 0.604 | 4.8E-63 | 7.2E-60 |          |          |
| Id1          | 0.318    | 0.832 | 0.819 | 1.9E-28 | 2.8E-25  | Fam20c   | 0.379            | 0.847    | 0.869 | 2.1E-60 | 3.1E-57 |          |          |
| Fam20c       | 0.332    | 0.792 | 0.904 | 6.0E-27 | 9.0E-24  | Slc37a2  | 0.582            | 0.609    | 0.576 | 3.5E-55 | 5.3E-52 |          |          |
| Ctsc         | 0.283    | 0.661 | 0.629 | 8.2E-26 | 1.2E-22  | Ctsl     | 0.651            | 0.807    | 0.742 | 5.6E-54 | 8.4E-51 |          |          |
| Lamtor4      | 0.498    | 0.641 | 0.610 | 1.3E-25 | 2.0E-22  | Fabp5    | 0.488            | 0.626    | 0.784 | 3.1E-49 | 4.6E-46 |          |          |
| Csf1r        | 0.363    | 0.280 | 0.375 | 2.1E-25 | 3.2E-22  | Ctsa     | 0.516            | 0.748    | 0.695 | 6.2E-49 | 9.3E-46 |          |          |
| Rhoc         | 0.353    | 0.529 | 0.648 | 1.6E-24 | 2.4E-21  | Hsp90aa1 | 1.357            | 0.762    | 0.791 | 1.2E-48 | 1.8E-45 |          |          |
| Cdc42ep3     | 0.331    | 0.512 | 0.462 | 5.0E-23 | 7.5E-20  | Tim2     | 1.159            | 0.724    | 0.658 | 9.5E-47 | 1.4E-43 |          |          |
| Krt18        | 0.259    | 0.611 | 0.616 | 1.1E-21 | 1.7E-18  | Hal      | 0.601            | 0.514    | 0.776 | 7.5E-29 | 1.1E-25 |          |          |
| Rgs1         | 0.444    | 0.650 | 0.843 | 6.1E-21 | 9.2E-18  | Cldn1    | 0.594            | 0.582    | 0.669 | 4.4E-28 | 6.6E-25 |          |          |
| H2afz        | 0.536    | 0.744 | 0.728 | 1.6E-19 | 2.5E-16  | Jdp2     | 0.437            | 0.670    | 0.653 | 2.7E-25 | 4.0E-22 |          |          |
| Rpl3         | 0.306    | 0.538 | 0.517 | 1.6E-16 | 2.4E-13  | Acod1    | 0.845            | 0.548    | 0.530 | 8.1E-24 | 1.2E-20 |          |          |
| Hist1h2ap    | 0.291    | 0.508 | 0.492 | 1.7E-16 | 2.5E-13  | Slc7a11  | 0.925            | 0.565    | 0.555 | 1.8E-23 | 2.7E-20 |          |          |
| Mpeg1        | 0.501    | 0.595 | 0.621 | 2.6E-16 | 3.8E-13  | Gm       | 0.382            | 0.873    | 0.835 | 1.8E-21 | 2.8E-18 |          |          |
| Cfp          | 0.260    | 0.543 | 0.504 | 1.5E-15 | 2.2E-12  | Vegfa    | 0.831            | 0.495    | 0.452 | 1.0E-20 | 1.6E-17 |          |          |
| Tubb6        | 0.260    | 0.394 | 0.341 | 4.6E-14 | 7.0E-11  | Gm26870  | 0.478            | 0.567    | 0.719 | 2.0E-19 | 3.0E-16 |          |          |
| Erp29        | 0.740    | 0.600 | 0.627 | 1.3E-13 | 2.0E-10  | Gusb     | 0.335            | 0.618    | 0.634 | 2.3E-19 | 3.5E-16 |          |          |
| Fyb          | 0.264    | 0.751 | 0.780 | 2.7E-10 | 4.0E-07  | Cd300c2  | 0.375            | 0.675    | 0.645 | 4.3E-19 | 6.5E-16 |          |          |
| Spp1         | 0.341    | 0.831 | 0.843 | 3.7E-09 | 5.5E-06  | Hspe1    | 0.432            | 0.639    | 0.663 | 1.4E-15 | 2.1E-12 |          |          |
| Atad2        | 0.270    | 0.495 | 0.481 | 4.1E-09 | 6.2E-06  | Slc43a3  | 0.361            | 0.577    | 0.707 | 1.5E-15 | 2.3E-12 |          |          |
| Bcl2a1d      | 0.651    | 0.380 | 0.413 | 7.1E-08 | 1.1E-04  | Abcg1    | 0.435            | 0.571    | 0.559 | 2.1E-15 | 3.2E-12 |          |          |
| S100a10      | 0.397    | 0.513 | 0.610 | 3.7E-07 | 5.6E-04  | Syne1    | 0.692            | 0.511    | 0.667 | 2.2E-14 | 3.3E-11 |          |          |
| Ctss         | 0.529    | 0.679 | 0.716 | 6.8E-07 | 1.0E-03  | Rps6ka2  | 0.368            | 0.521    | 0.558 | 4.6E-14 | 6.8E-11 |          |          |
| Apoe         | 0.328    | 0.748 | 0.737 | 8.0E-06 | 1.2E-02  | Flt1-ps1 | 0.479            | 0.338    | 0.347 | 1.7E-11 | 2.5E-08 |          |          |
| Tnf          | 0.345    | 0.327 | 0.311 | 8.5E-06 | 1.3E-02  | C3       | 0.346            | 0.632    | 0.634 | 4.3E-11 | 6.5E-08 |          |          |
| Gm12840      | 1.062    | 0.321 | 0.302 | 6.5E-05 | 9.7E-02  | Thbs1    | 1.191            | 0.451    | 0.593 | 1.1E-09 | 1.6E-06 |          |          |
| Pou2f2       | 0.584    | 0.387 | 0.411 | 7.3E-04 | 1.0E+00  | Hbb-bs   | 0.414            | 0.804    | 0.812 | 3.3E-09 | 5.0E-06 |          |          |
| Aprt         | 0.360    | 0.639 | 0.770 | 1.4E-03 | 1.0E+00  | Rpl3     | 0.505            | 0.532    | 0.522 | 5.9E-09 | 8.8E-06 |          |          |
| Abca1        | 0.524    | 0.768 | 0.829 | 4.0E-03 | 1.0E+00  | Acp5     | 0.601            | 0.473    | 0.461 | 1.5E-03 | 1.0E+00 |          |          |
| Tgfb1        | 0.309    | 0.586 | 0.654 | 5.9E-03 | 1.0E+00  | Hspa1a   | 0.817            | 0.527    | 0.564 | 1.7E-03 | 1.0E+00 |          |          |
| Acp5         | 0.644    | 0.451 | 0.471 | 7.0E-03 | 1.0E+00  | Spp1     | 1.001            | 0.762    | 0.862 | 5.5E-03 | 1.0E+00 |          |          |
| <b>Neu-2</b> | BC100530 | 1.757 | 0.815 | 0.739   | 0.0E+00  | 0.0E+00  | <b>Neu-5-IFN</b> | lsg15    | 3.959 | 0.914   | 0.574   | 8.6E-166 | 1.3E-162 |
|              | Gm5483   | 1.712 | 0.938 | 0.789   | 0.0E+00  | 0.0E+00  |                  | Rsad2    | 3.922 | 0.893   | 0.799   | 5.5E-153 | 8.3E-150 |
|              | Wfdc17   | 1.379 | 0.993 | 0.891   | 0.0E+00  | 0.0E+00  |                  | lfi47    | 2.686 | 0.858   | 0.765   | 3.1E-121 | 4.7E-118 |
|              | Cxcl2    | 1.173 | 0.951 | 0.703   | 0.0E+00  | 0.0E+00  |                  | lfitm3   | 2.227 | 0.937   | 0.742   | 1.4E-114 | 2.1E-111 |
|              | lfitm1   | 1.111 | 0.963 | 0.776   | 0.0E+00  | 0.0E+00  |                  | Gbp2     | 3.371 | 0.883   | 0.701   | 2.0E-112 | 3.0E-109 |
|              | Lrg1     | 0.856 | 0.929 | 0.751   | 0.0E+00  | 0.0E+00  |                  | lfit2    | 1.589 | 0.827   | 0.776   | 2.5E-109 | 3.8E-106 |
|              | Egr1     | 0.840 | 0.912 | 0.633   | 0.0E+00  | 0.0E+00  |                  | Rtp4     | 2.640 | 0.820   | 0.711   | 1.3E-94  | 1.9E-91  |
|              | Retnlg   | 0.817 | 0.960 | 0.812   | 0.0E+00  | 0.0E+00  |                  | Slfn4    | 2.454 | 0.848   | 0.736   | 8.9E-90  | 1.3E-86  |
|              | Wfdc21   | 0.764 | 0.945 | 0.788   | 0.0E+00  | 0.0E+00  |                  | Slfn5    | 2.495 | 0.787   | 0.619   | 1.1E-87  | 1.7E-84  |
|              | Ccl6     | 0.733 | 0.910 | 0.693   | 0.0E+00  | 0.0E+00  |                  | lfit1bl2 | 0.982 | 0.794   | 0.613   | 2.2E-77  | 3.3E-74  |
|              | Lcn2     | 0.710 | 0.911 | 0.736   | 0.0E+00  | 0.0E+00  |                  | lsg20    | 2.415 | 0.731   | 0.518   | 3.4E-64  | 5.1E-61  |
|              | Cxcl3    | 0.666 | 0.840 | 0.353   | 0.0E+00  | 0.0E+00  |                  | lfit1    | 3.118 | 0.693   | 0.425   | 1.5E-61  | 2.2E-58  |
|              | Tceal9   | 0.526 | 0.888 | 0.729   | 0.0E+00  | 0.0E+00  |                  | Zbp1     | 1.428 | 0.789   | 0.729   | 2.5E-60  | 3.7E-57  |
|              | Slfn4    | 0.469 | 0.942 | 0.649   | 0.0E+00  | 0.0E+00  |                  | lfi202b  | 0.654 | 0.739   | 0.617   | 3.0E-57  | 4.5E-54  |
|              | Id1      | 0.277 | 0.915 | 0.784   | 4.8E-284 | 7.2E-281 |                  | lfit3b   | 2.094 | 0.698   | 0.535   | 7.2E-57  | 1.1E-53  |
|              | Slpi     | 0.579 | 0.904 | 0.662   | 4.9E-284 | 7.3E-281 |                  | Oasl1    | 2.280 | 0.668   | 0.414   | 6.9E-56  | 1.0E-52  |
|              | Dgat2    | 0.449 | 0.795 | 0.605   | 5.1E-282 | 7.6E-279 |                  | lfit3    | 3.099 | 0.612   | 0.263   | 4.7E-39  | 7.0E-36  |
|              | Adam8    | 1.014 | 0.729 | 0.463   | 8.4E-262 | 1.3E-258 |                  | Cldn1    | 0.258 | 0.777   | 0.646   | 1.1E-38  | 1.6E-35  |
|              | Prok2    | 0.277 | 0.790 | 0.700   | 4.3E-239 | 6.4E-236 |                  | Bst2     | 1.698 | 0.657   | 0.525   | 6.1E-38  | 9.1E-35  |
|              | Vim      | 0.636 | 0.831 | 0.556   | 1.3E-219 | 2.0E-216 |                  | Ctss     | 1.414 | 0.764   | 0.701   | 7.1E-37  | 1.1E-33  |
|              | G0s2     | 0.703 | 0.819 | 0.568   | 3.6E-170 | 5.3E-167 |                  | Fcgr4    | 0.876 | 0.812   | 0.699   | 1.1E-32  | 1.6E-29  |
|              | Glrx     | 0.709 | 0.678 | 0.390   | 5.3E-170 | 7.9E-167 |                  | Cmpk2    | 1.332 | 0.647   | 0.692   | 9.6E-30  | 1.4E-26  |

|                      |               |       |       |         |          |          |  |           |       |       |       |         |         |
|----------------------|---------------|-------|-------|---------|----------|----------|--|-----------|-------|-------|-------|---------|---------|
|                      | F630028O10Ril | 0.557 | 0.798 | 0.542   | 6.6E-167 | 9.8E-164 |  | Clec4a3   | 0.377 | 0.614 | 0.450 | 1.1E-28 | 1.6E-25 |
|                      | Ier3          | 0.594 | 0.972 | 0.826   | 5.5E-157 | 8.2E-154 |  | Acod1     | 0.910 | 0.764 | 0.528 | 9.0E-26 | 1.3E-22 |
|                      | Steap4        | 0.560 | 0.732 | 0.674   | 8.3E-127 | 1.2E-123 |  | Ii18      | 0.463 | 0.556 | 0.366 | 4.8E-23 | 7.2E-20 |
|                      | Gadd45a       | 0.551 | 0.731 | 0.616   | 2.4E-122 | 3.6E-119 |  | Fxyd3     | 0.255 | 0.571 | 0.443 | 7.7E-23 | 1.2E-19 |
|                      | Stfa2l1       | 1.367 | 0.682 | 0.553   | 2.0E-118 | 3.0E-115 |  | Irf7      | 1.505 | 0.642 | 0.564 | 5.3E-21 | 7.9E-18 |
|                      | Csf2rb        | 0.259 | 0.921 | 0.714   | 1.3E-114 | 1.9E-111 |  | Ii18bp    | 0.433 | 0.508 | 0.318 | 7.1E-20 | 1.1E-16 |
|                      | Stfa2         | 0.989 | 0.680 | 0.704   | 2.8E-87  | 4.2E-84  |  | Cxcl10    | 1.827 | 0.551 | 0.388 | 8.9E-20 | 1.3E-16 |
|                      | Ii1f9         | 0.250 | 0.718 | 0.540   | 2.8E-75  | 4.3E-72  |  | Lair1     | 0.305 | 0.609 | 0.516 | 8.0E-19 | 1.2E-15 |
|                      | Asprv1        | 0.555 | 0.707 | 0.722   | 3.9E-33  | 5.8E-30  |  | Gm4316    | 0.443 | 0.279 | 0.343 | 1.0E-17 | 1.5E-14 |
|                      | Saa3          | 0.387 | 0.748 | 0.691   | 3.2E-27  | 4.7E-24  |  | Npc2      | 0.571 | 0.904 | 0.883 | 1.2E-17 | 1.9E-14 |
|                      | Tacstd2       | 0.305 | 0.584 | 0.468   | 3.7E-24  | 5.5E-21  |  | Gbp5      | 1.547 | 0.660 | 0.801 | 1.3E-17 | 1.9E-14 |
|                      | Osm           | 0.506 | 0.460 | 0.331   | 1.0E-09  | 1.6E-06  |  | AW112010  | 0.469 | 0.520 | 0.370 | 1.3E-17 | 1.9E-14 |
|                      | Hacd4         | 0.294 | 0.496 | 0.406   | 4.6E-03  | 1.0E+00  |  | Cd274     | 0.977 | 0.736 | 0.682 | 3.9E-16 | 5.9E-13 |
| <b>Neu-4-classic</b> | Retnlg        | 3.329 | 0.993 | 0.845   | 0.0E+00  | 0.0E+00  |  | Hes1      | 0.375 | 0.358 | 0.549 | 4.7E-16 | 7.0E-13 |
|                      | Iifitn6       | 3.306 | 0.992 | 0.478   | 0.0E+00  | 0.0E+00  |  | Iifi207   | 0.258 | 0.655 | 0.691 | 6.5E-15 | 9.7E-12 |
|                      | Lcn2          | 2.827 | 0.999 | 0.771   | 0.0E+00  | 0.0E+00  |  | Usp18     | 1.418 | 0.604 | 0.700 | 7.7E-15 | 1.2E-11 |
|                      | Wfdc21        | 2.632 | 0.999 | 0.822   | 0.0E+00  | 0.0E+00  |  | Abcg1     | 0.446 | 0.701 | 0.558 | 1.4E-13 | 2.2E-10 |
|                      | Mmp8          | 2.622 | 0.971 | 0.633   | 0.0E+00  | 0.0E+00  |  | Fyb       | 0.553 | 0.835 | 0.768 | 1.2E-12 | 1.8E-09 |
|                      | Ly6g          | 2.187 | 0.944 | 0.567   | 0.0E+00  | 0.0E+00  |  | Bcl2a1b   | 0.420 | 0.751 | 0.586 | 9.3E-11 | 1.4E-07 |
|                      | Anxa1         | 2.167 | 0.997 | 0.716   | 0.0E+00  | 0.0E+00  |  | Cxcl9     | 0.426 | 0.736 | 0.737 | 1.9E-08 | 2.8E-05 |
|                      | Prok2         | 2.127 | 0.960 | 0.707   | 0.0E+00  | 0.0E+00  |  | Iifi2712a | 2.036 | 0.553 | 0.506 | 1.4E-07 | 2.1E-04 |
|                      | Lrg1          | 1.793 | 0.992 | 0.789   | 0.0E+00  | 0.0E+00  |  | Cybb      | 0.284 | 0.546 | 0.446 | 3.7E-07 | 5.5E-04 |
|                      | Iifitn3       | 1.588 | 0.989 | 0.726   | 0.0E+00  | 0.0E+00  |  | Ly6i      | 0.647 | 0.586 | 0.648 | 9.8E-07 | 1.5E-03 |
|                      | Cd177         | 1.349 | 0.907 | 0.656   | 0.0E+00  | 0.0E+00  |  | Plac8     | 1.572 | 0.533 | 0.491 | 1.0E-06 | 1.6E-03 |
|                      | Ggt1          | 1.045 | 0.897 | 0.603   | 0.0E+00  | 0.0E+00  |  | Mpeg1     | 0.339 | 0.726 | 0.608 | 2.2E-06 | 3.4E-03 |
|                      | Glul          | 0.436 | 0.853 | 0.387   | 0.0E+00  | 0.0E+00  |  | Emp3      | 0.292 | 0.447 | 0.314 | 2.4E-06 | 3.5E-03 |
|                      | Gyg           | 0.996 | 0.863 | 0.596   | 8.3E-285 | 1.2E-281 |  | Gm20234   | 0.310 | 0.609 | 0.679 | 2.7E-06 | 4.1E-03 |
|                      | Wfdc17        | 1.832 | 0.997 | 0.916   | 2.1E-279 | 3.1E-276 |  | Cst3      | 0.308 | 0.858 | 0.835 | 9.4E-06 | 1.4E-02 |
|                      | Chil1         | 0.973 | 0.942 | 0.592   | 8.9E-269 | 1.3E-265 |  | Ddx60     | 1.381 | 0.528 | 0.576 | 2.6E-05 | 3.9E-02 |
|                      | Steap4        | 0.716 | 0.940 | 0.670   | 1.5E-254 | 2.2E-251 |  | Iifi209   | 1.094 | 0.563 | 0.675 | 6.0E-05 | 9.0E-02 |
|                      | Stfa2         | 1.185 | 0.909 | 0.678   | 2.8E-254 | 4.2E-251 |  | Unc93b1   | 0.390 | 0.569 | 0.519 | 6.2E-05 | 9.3E-02 |
|                      | Tgm1          | 0.493 | 0.865 | 0.635   | 2.0E-252 | 3.0E-249 |  | Hba-a1    | 0.963 | 0.429 | 0.553 | 1.2E-04 | 1.7E-01 |
|                      | Mgst1         | 0.981 | 0.870 | 0.580   | 2.4E-243 | 3.6E-240 |  | Lyz2      | 0.310 | 0.838 | 0.771 | 1.9E-03 | 1.0E+00 |
|                      | Flna          | 0.955 | 0.875 | 0.433   | 4.9E-242 | 7.4E-239 |  | Ccl4      | 0.628 | 0.921 | 0.920 | 2.1E-03 | 1.0E+00 |
|                      | Ngp           | 1.645 | 0.786 | 0.355   | 7.6E-234 | 1.1E-230 |  | Ly6c2     | 1.048 | 0.482 | 0.460 | 3.0E-03 | 1.0E+00 |
|                      | Slpi          | 1.162 | 0.978 | 0.715   | 2.2E-232 | 3.3E-229 |  |           |       |       |       |         |         |
|                      | Hacd4         | 1.004 | 0.822 | 0.400   | 5.4E-230 | 8.1E-227 |  |           |       |       |       |         |         |
|                      | Iifitn1       | 1.769 | 0.992 | 0.819   | 1.3E-203 | 2.0E-200 |  |           |       |       |       |         |         |
|                      | Ccl6          | 1.106 | 0.959 | 0.742   | 2.3E-188 | 3.5E-185 |  |           |       |       |       |         |         |
|                      | Smpd13a       | 0.852 | 0.826 | 0.558   | 3.0E-187 | 4.5E-184 |  |           |       |       |       |         |         |
|                      | Tuba1a        | 0.578 | 0.780 | 0.474   | 1.3E-175 | 1.9E-172 |  |           |       |       |       |         |         |
|                      | Vim           | 0.919 | 0.966 | 0.611   | 2.8E-175 | 4.1E-172 |  |           |       |       |       |         |         |
|                      | Syne1         | 0.469 | 0.810 | 0.615   | 7.0E-163 | 1.1E-159 |  |           |       |       |       |         |         |
|                      | Tgfb1         | 0.673 | 0.922 | 0.604   | 6.7E-159 | 1.0E-155 |  |           |       |       |       |         |         |
|                      | Glrx          | 0.596 | 0.853 | 0.445   | 1.3E-157 | 2.0E-154 |  |           |       |       |       |         |         |
|                      | Tacstd2       | 0.565 | 0.812 | 0.476   | 1.1E-141 | 1.7E-138 |  |           |       |       |       |         |         |
|                      | Pi16          | 0.611 | 0.785 | 0.543   | 5.7E-120 | 8.6E-117 |  |           |       |       |       |         |         |
|                      | Lyz2          | 0.426 | 0.978 | 0.755   | 2.3E-116 | 3.4E-113 |  |           |       |       |       |         |         |
|                      | Lmo4          | 0.573 | 0.715 | 0.315   | 5.2E-112 | 7.9E-109 |  |           |       |       |       |         |         |
|                      | Ly6c2         | 0.617 | 0.708 | 0.439   | 1.4E-109 | 2.1E-106 |  |           |       |       |       |         |         |
|                      | BC100530      | 1.364 | 0.877 | 0.752   | 3.0E-94  | 4.5E-91  |  |           |       |       |       |         |         |
|                      | Aldh2         | 0.324 | 0.698 | 0.433   | 2.9E-86  | 4.3E-83  |  |           |       |       |       |         |         |
|                      | Stfa2l1       | 0.440 | 0.835 | 0.571   | 5.3E-68  | 7.9E-65  |  |           |       |       |       |         |         |
|                      | Ceacam1       | 0.277 | 0.709 | 0.530   | 2.0E-64  | 3.0E-61  |  |           |       |       |       |         |         |
|                      | Plac8         | 0.327 | 0.668 | 0.476   | 5.6E-64  | 8.4E-61  |  |           |       |       |       |         |         |
|                      | Acvrl1        | 0.598 | 0.673 | 0.666   | 1.5E-62  | 2.3E-59  |  |           |       |       |       |         |         |
|                      | Camp          | 1.496 | 0.597 | 0.402   | 1.9E-49  | 2.9E-46  |  |           |       |       |       |         |         |
|                      | Serp1nb1a     | 0.774 | 0.616 | 0.519   | 1.8E-45  | 2.7E-42  |  |           |       |       |       |         |         |
|                      | Abcd2         | 0.289 | 0.621 | 0.535   | 1.2E-40  | 1.8E-37  |  |           |       |       |       |         |         |
|                      | Stfa3         | 0.395 | 0.382 | 0.646   | 1.5E-34  | 2.3E-31  |  |           |       |       |       |         |         |
| Sept9                | 0.260         | 0.546 | 0.375 | 1.8E-28 | 2.7E-25  |          |  |           |       |       |       |         |         |
| Olfm4                | 0.922         | 0.683 | 0.609 | 5.7E-22 | 8.6E-19  |          |  |           |       |       |       |         |         |
| Asprv1               | 0.255         | 0.706 | 0.718 | 2.2E-13 | 3.3E-10  |          |  |           |       |       |       |         |         |
| C130026I21Rik        | 0.253         | 0.399 | 0.417 | 2.3E-11 | 3.5E-08  |          |  |           |       |       |       |         |         |

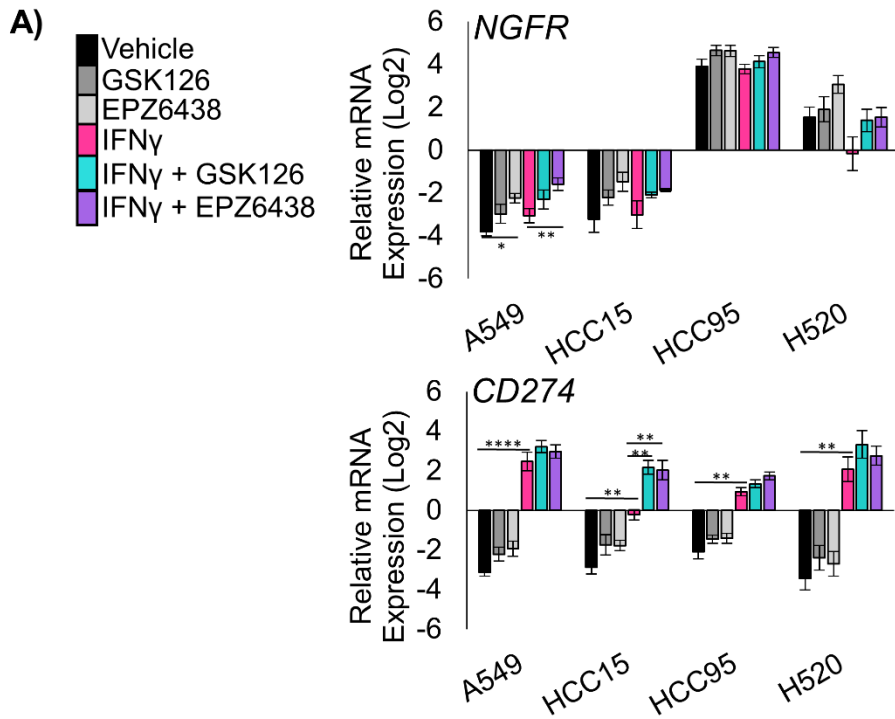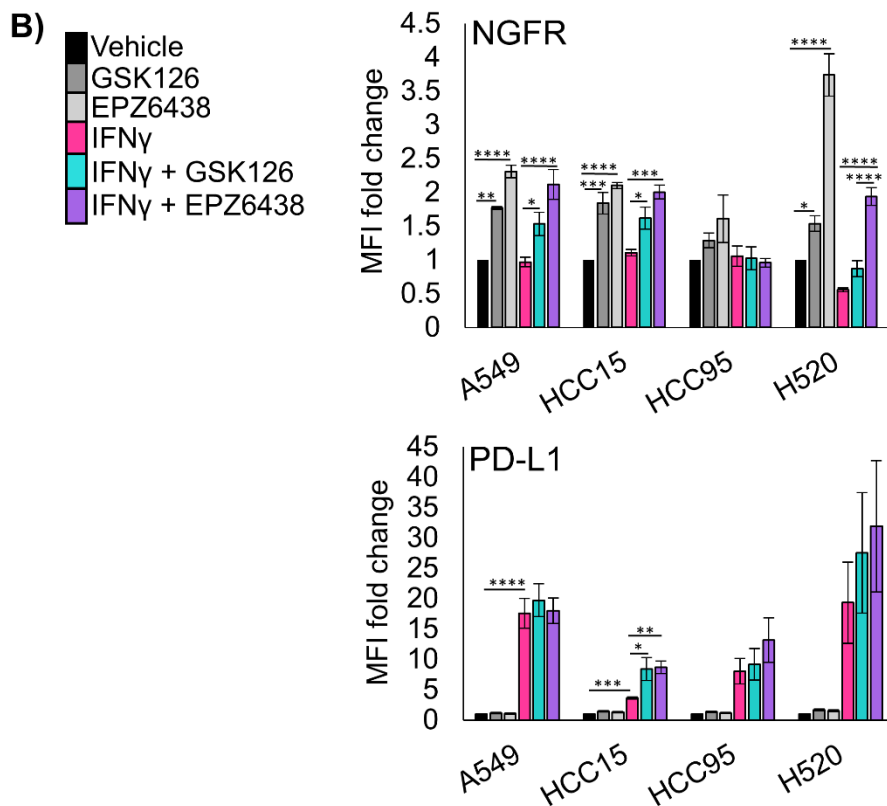

**Supplementary Figure 1: Related to Figure 1**

**A)** RT-qPCR in the indicated four human lung cancer cell lines treated for 7 days with vehicle or EZH2 inhibition with IFN $\gamma$  added on day 5 for the genes *NGFR* and *CD274*, mean  $\pm$  SEM is graphed, n = 4 individual experiments, \* indicated  $p=0.0481$  \*\* $p<0.0098$ , \*\*\*\* $p<0.0001$  by one-way ANOVA with pairwise comparisons and Holm-Šidák's *post hoc* test. **B)** Flow cytometry analysis of indicated four human lung cancer cell lines treated

for 6 days with vehicle or EZH2 inhibition with IFN $\gamma$  added on day 5 for the cell surface proteins NGFR and PD-L1, mean  $\pm$  SEM is graphed, n = 4 individual experiments, \* indicated p = 0.04, \*\*p=0.0033, \*\*\*p<0.0003, \*\*\*\*p<0.0001 by one-way ANOVA with pairwise comparisons and Holm-Šidák's *post hoc* test.

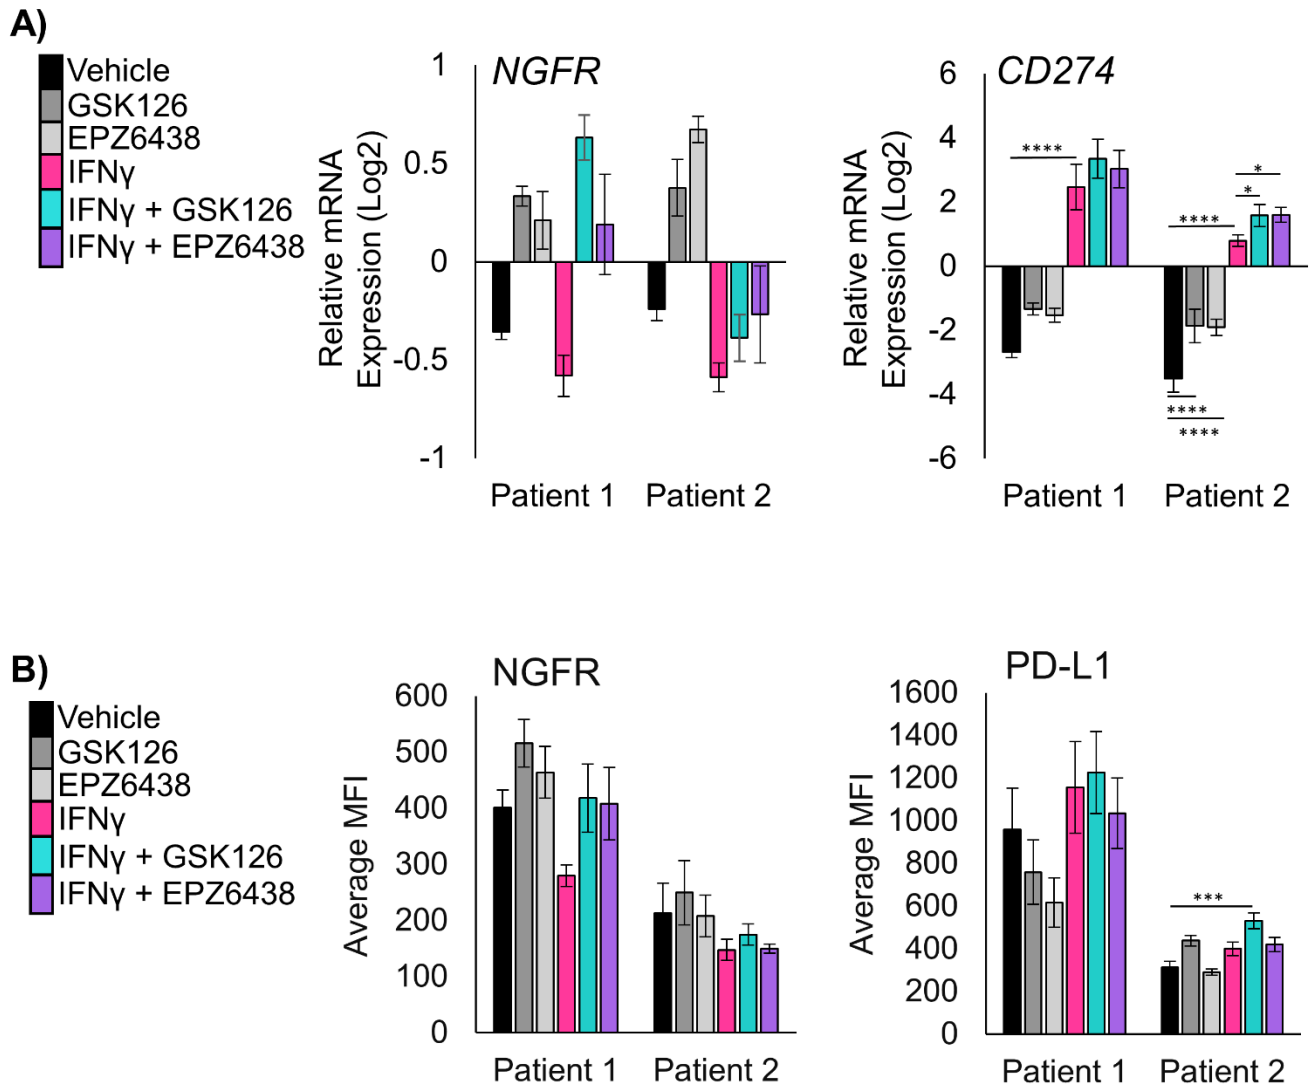

**Supplementary Figure 2: Related to Figure 2**

**A)** RT-qPCR in the indicated two unique patient-derived tumoroid cultures treated for 11 days and IFN $\gamma$  added on day 9 for the genes *NGFR* and *CD274*, mean +/- SEM is graphed, n = 4 individual experiments, \* indicates  $p < 0.03$ , \*\*\*\* $p < 0.0001$  by one-way ANOVA with pairwise comparisons and Holm-Šídák's *post hoc* test. **B)** Flow cytometry analysis of indicated two unique patient derived tumoroid cultures treated for 11 days and IFN $\gamma$  added on day 9 for the cell surface proteins NGFR and PD-L1, mean +/- SEM is graphed, n = 4 individual experiments, \*\*\* indicates  $p = 0.0002$  by one-way ANOVA with pairwise comparisons and Holm-Šídák's *post hoc* test.



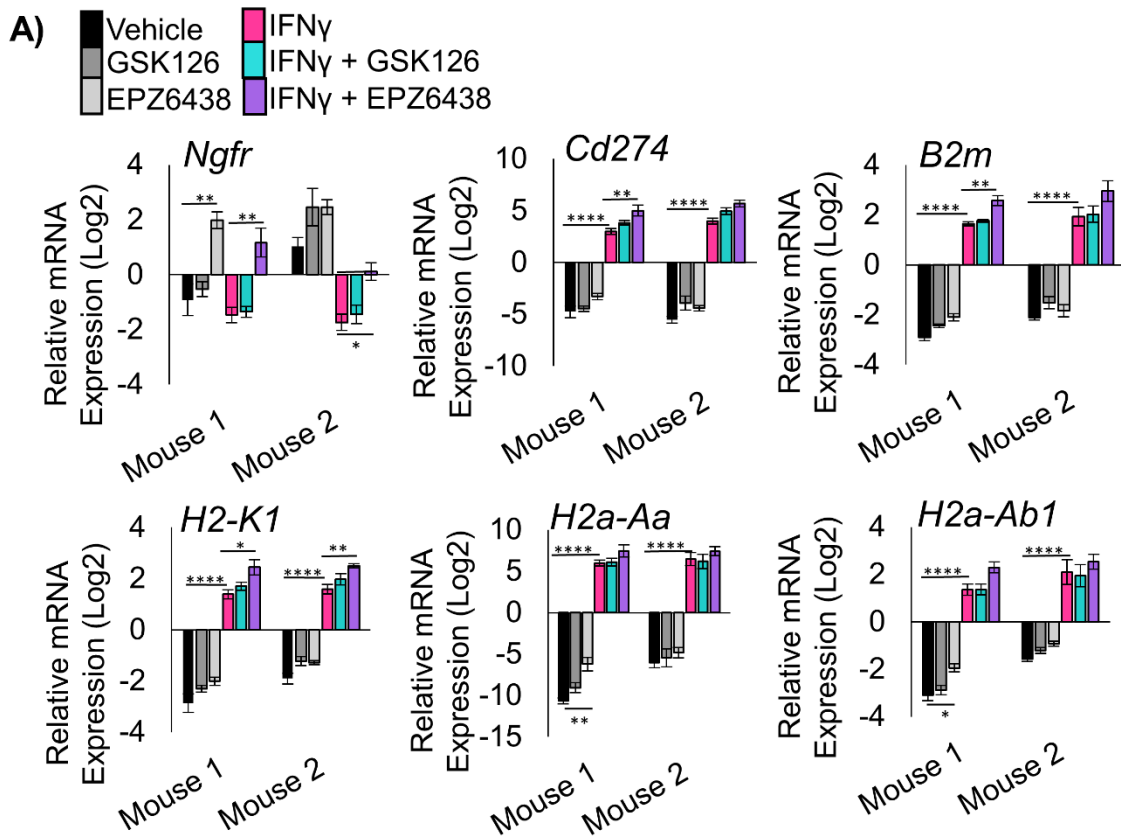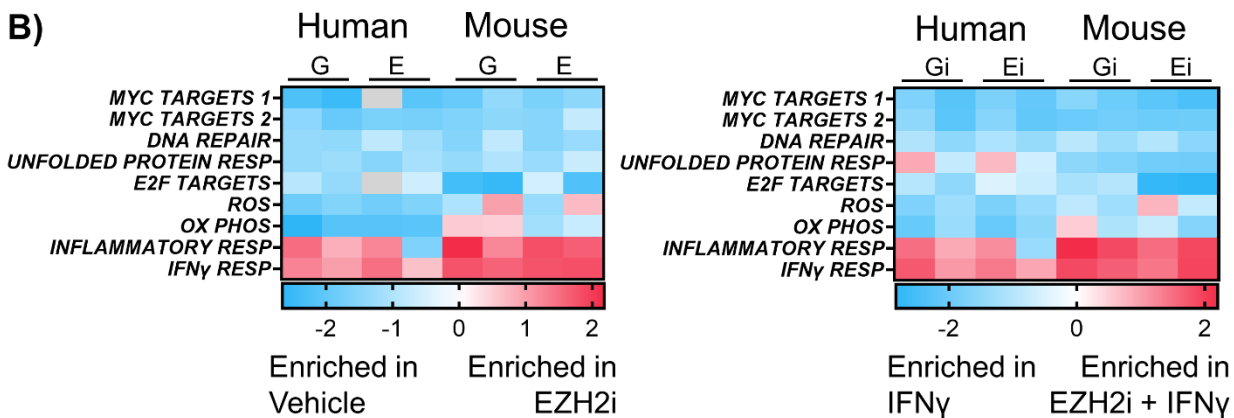

**Supplementary Figure 3: Related to Figure 3**

**A)** RT-qPCR in the indicated two unique murine tumoroid cultures treated for 11 days and IFN $\gamma$  added on day 9 for the genes *Ngfr*, *B2m*, *H2-K1*, *Cd274*, and *H2a-Aa*, mean +/- SEM is graphed, n = 5 individual experiments for mouse 1, n=4 individual experiments for mouse 2, \* indicates p<0.05, \*\*p<0.009, \*\*\*\*p<0.0001 by one-way ANOVA with pairwise comparisons and Holm-Šidák's *post hoc* test. **B)** Heat map of Enrichment Scores using Gene Set Enrichment Analysis on human or murine tumoroids treated with the EZH2 inhibitors GSK126 (G) or EPZ6438 (E) contrasted to vehicle control, or treated with EZH2 inhibitor and IFN $\gamma$  contrasted to IFN $\gamma$  alone. See also Supp. Table 2.

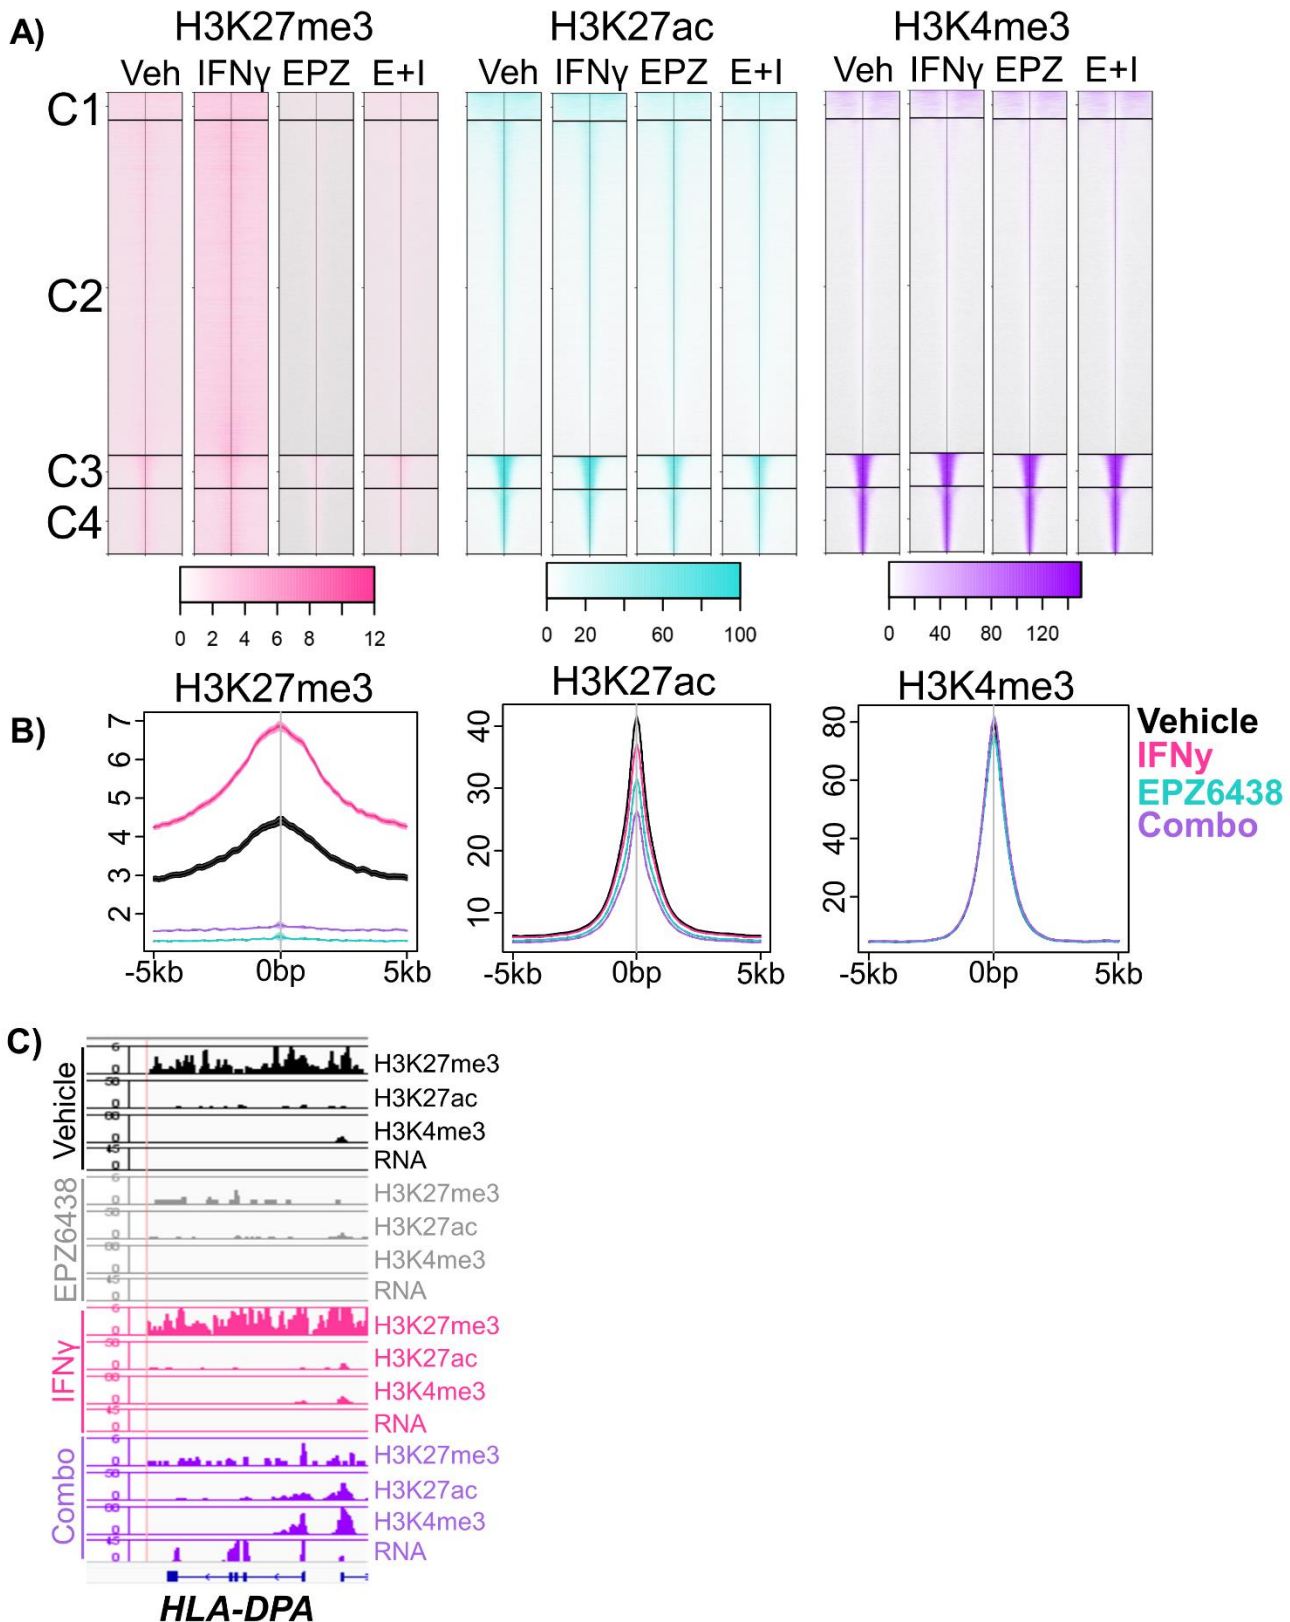

**Supplementary Figure 4: Related to Figure 4**

**A)** Heatmap representation of H3K27me3-, H3K27ac- and H3K4me3-bound chromatin peaks centered across a  $\pm 5$ kb window that shows occupancy in tumoroids cultures of the indicated treatments. **B)** Histogram of merged

ChIP-seq peaks in the indicated 3D tumoroid samples. **C)** Wiggle plots for H3K27me3, H3K27ac, and H3K4me3 histone mark enrichments, and matched RNAseq tracks in patient-derived tumoroids from the indicated treatment groups for the gene *HLA-DPA*.

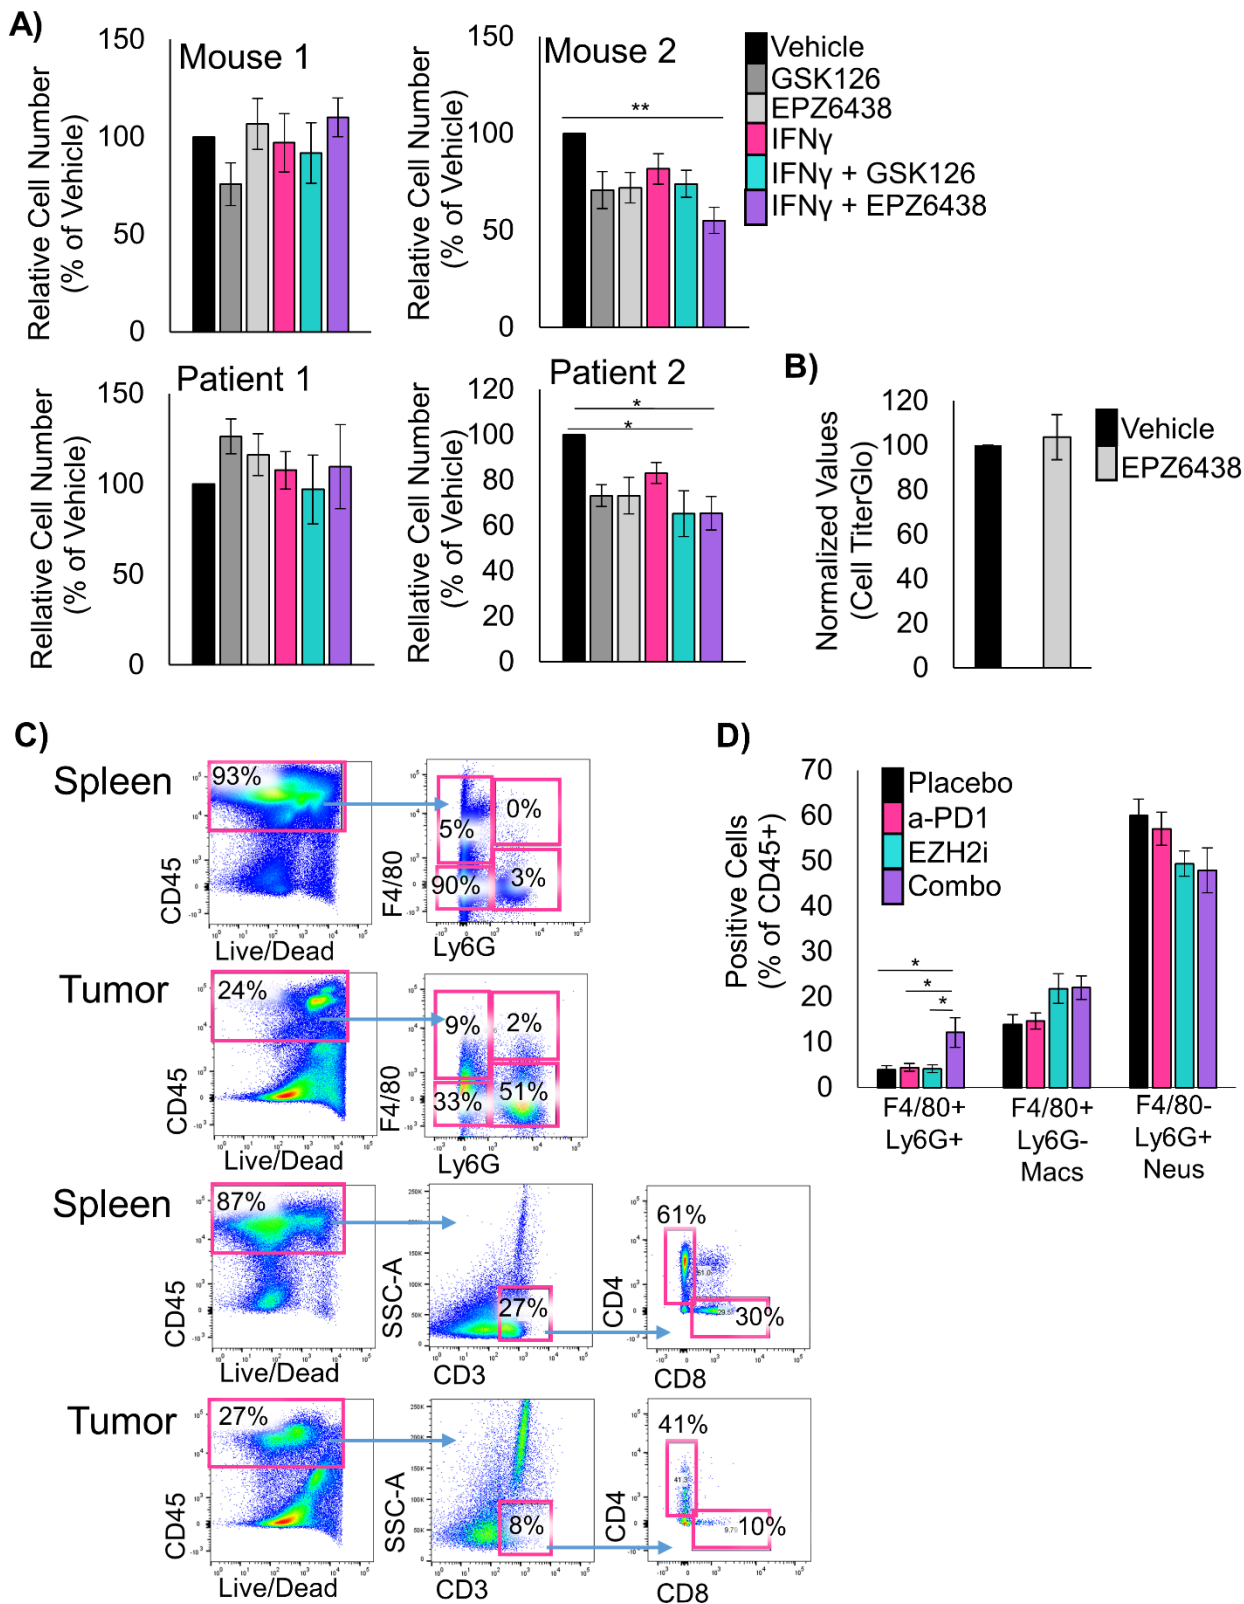

**Supplementary Figure 5: Related to Figure 5**

**A)** Relative counts of cells after dissociation of tumoroids treated with the indicated treatments, mean  $\pm$  s.e.m. is plotted,  $n=4$  individual experiments for the human tumoroids,  $n=7$  experiments for mouse 1 and  $n=5$  experiments for mouse 2, \* indicates  $p<0.0250$ , \*\* $p=0.0048$  by one-way ANOVA with multiple comparisons and

Holm-Šídák's *post-hoc* test. **B)** Relative luminescence from CellTiter Glo assayed tumoroid cultures treated with vehicle or EPZ6438, mean  $\pm$  s.e.m. is plotted, n=4 individual experiments. **C)** Representative flow cytometry plots with the indicated samples and markers. The left plots are gated on FSC/SSC and Live/Dead negative cells. Spleen samples are shown as staining controls. **D)** Flow cytometry analysis of dissociated tumors from the syngeneic grafts from the indicated treatment arms at day 14. Percentage of CD45+ cells expressing F4/80 or Ly6G are graphed, mean  $\pm$  s.e.m. is plotted, placebo n=8, EZH2 inhibitor n=8, anti-PD1 n=9, combo n=7, \* indicates  $p < 0.012$ , by one-way ANOVA with multiple comparisons and Holm-Šídák's *post-hoc* test.

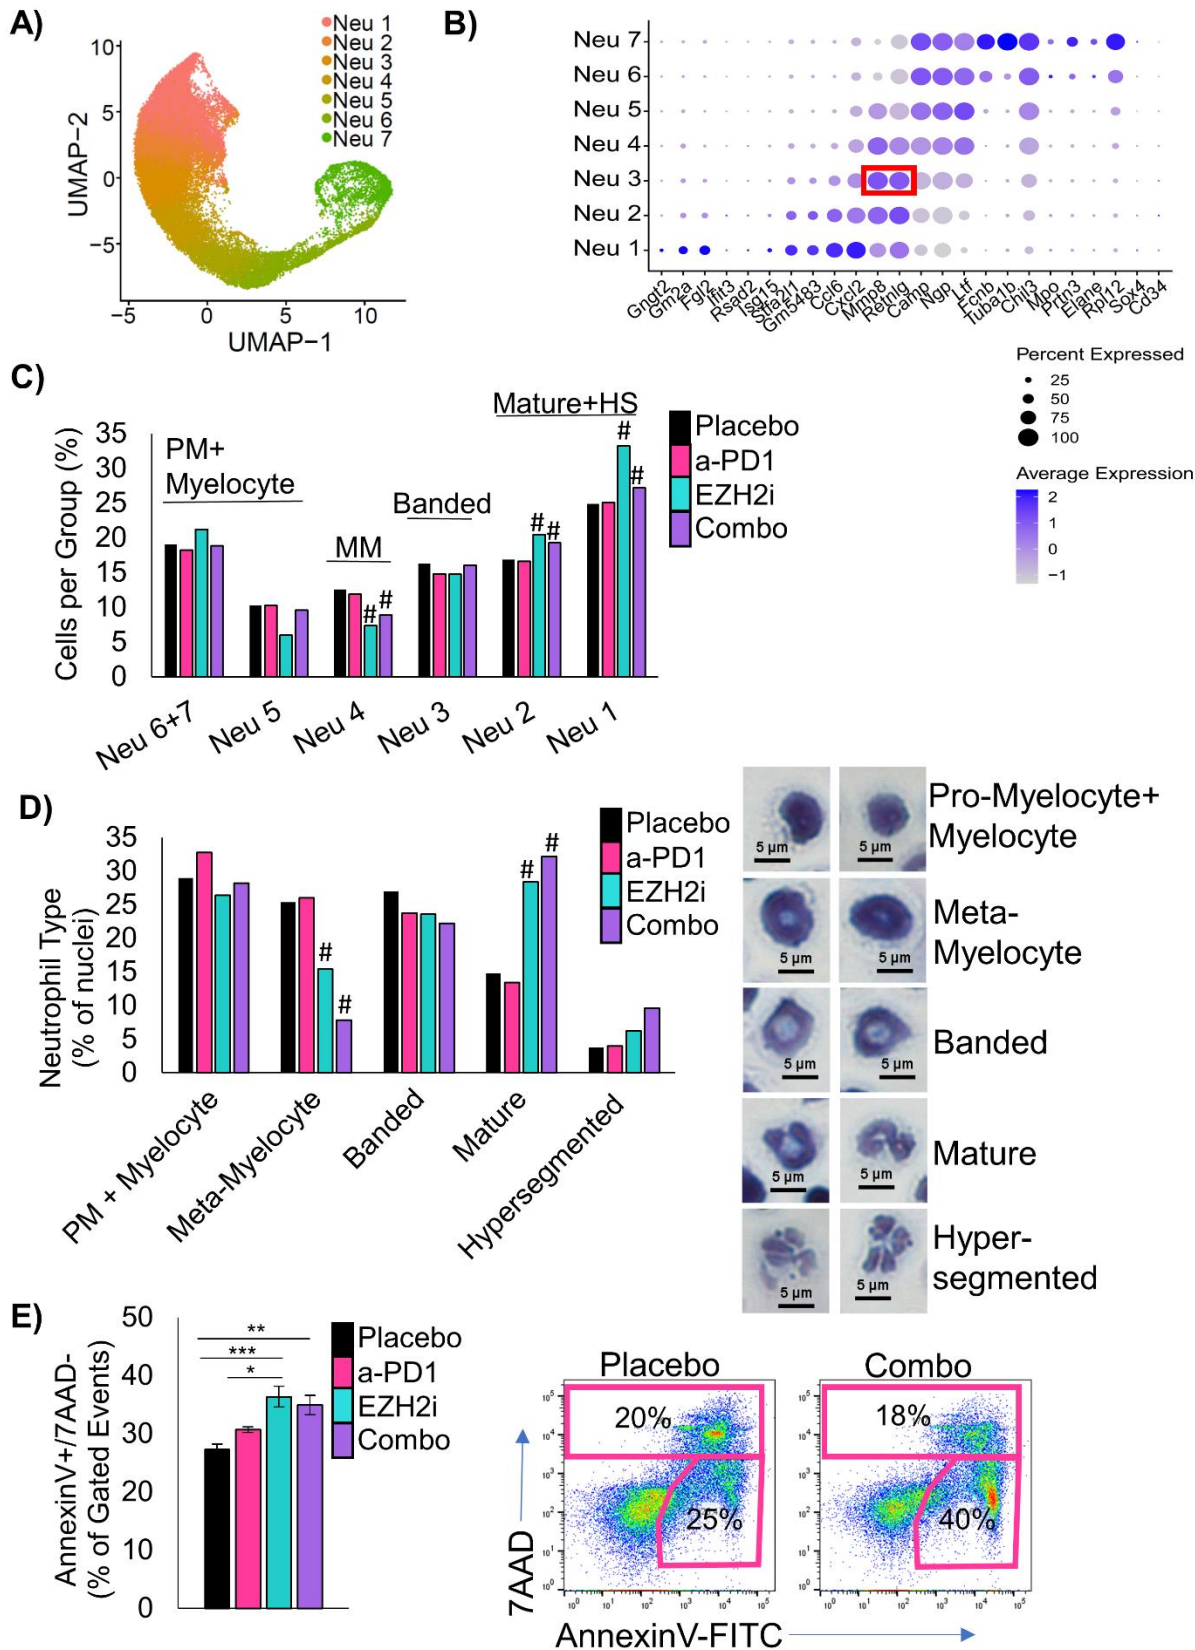

**Supplementary Figure 6: Related to Figure 6**

**A)** Annotated Uniform Manifold Approximation and Projection (UMAP) plot showing the 8 different populations of neutrophils within the bone marrow of tumor-bearing mice treated with placebo, GSK126, anti-PD1, or

combined GSK126 with anti-PD1. **B)** Dot plot showing the relative expression of marker genes (x-axis) in each neutrophil cluster (y-axis). Expression of *Mmp8* and *Rentlg* were shown to be enriched in banded neutrophils. **C)** Percentage of cells per treatment group graphed for the neutrophil populations, # indicates adjusted  $p < 0.008$  by proportion z-test. **D)** Proportions of different nuclear morphologies in bone marrow cytopins, average of  $n=2$  samples for Placebo,  $n=1$  sample for others, 500 nuclei were counted, # indicates  $p < 0.0004$  with Fisher's Exact test between Vehicle and EZH2 inhibitor or Vehicle and Placebo for meta-myelocyte vs mature neutrophils. Representative images of nuclei types shown, scale bar =  $5\mu\text{m}$ . **E)** Percentage of AnnexinV+/7AAD- cells in bone marrow cultures 48 hours post isolation from mice treated with the indicated therapies,  $n=3$  biological replicates each with 2 experimental replicates for placebo, EPZ6438 and combo,  $n=4$  biological replicates each with 2 experimental replicates for anti-PD1, \* indicates  $p=0.012$ , \*\* $p=0.0017$ , \*\*\* $p=0.0003$  by one-way ANOVA with pairwise comparisons and Holm-Šídák's *post-hoc* test. Representative flow plots of placebo and combination treated cultures shown.
